# Supplementary material for: Mechanism and origins of enantioselectivity of cobalt-catalyzed intermolecular hydroacylation/cyclization of 1,6-enynes with aldehydes
Source: Royal Society of Chemistry journal article supplement (doi:10.1039/d2qo00179a), 2022-01-01
Supplement: d2qo00179a1.pdf [file d2qo00179a1.pdf]

*Supporting Information*

**Mechanism and Origins of Enantioselectivity of  
Cobalt-Catalyzed Intermolecular  
Hydroacylation/Cyclization of 1,6-Enynes with  
Aldehydes**

Jiaao Ge, Hongli Wu, Deping Kong, Genping Huang\*

*Department of Chemistry, School of Science and Tianjin Key Laboratory of  
Molecular Optoelectronic Sciences, Tianjin University, Tianjin 300072, P. R. China.*

E-mail: gphuang@tju.edu.cn

**Table of Contents:**

|                                                                                         |           |
|-----------------------------------------------------------------------------------------|-----------|
| <b>1. Possible complexations between cobalt catalyst and reactants-----</b>             | <b>S2</b> |
| <b>2. C(acyl)-H bond cleavage of benzaldehyde-----</b>                                  | <b>S3</b> |
| <b>3. Calculated most favorable pathway with different spin state-----</b>              | <b>S4</b> |
| <b>4. <math>\sigma</math>-bond metathesis between the Co-C and C(acyl)-H bonds-----</b> | <b>S5</b> |
| <b>5. C-O double bond insertion into the Co-C(sp<sup>3</sup>) bond-----</b>             | <b>S6</b> |
| <b>6. Possible pathways leading to hydroarylation product-----</b>                      | <b>S7</b> |
| <b>7. Table of calculated energies and energy corrections-----</b>                      | <b>S8</b> |
| <b>8. Cartesian coordinates-----</b>                                                    | <b>S9</b> |

## 1. Possible complexations between cobalt catalyst and reactants

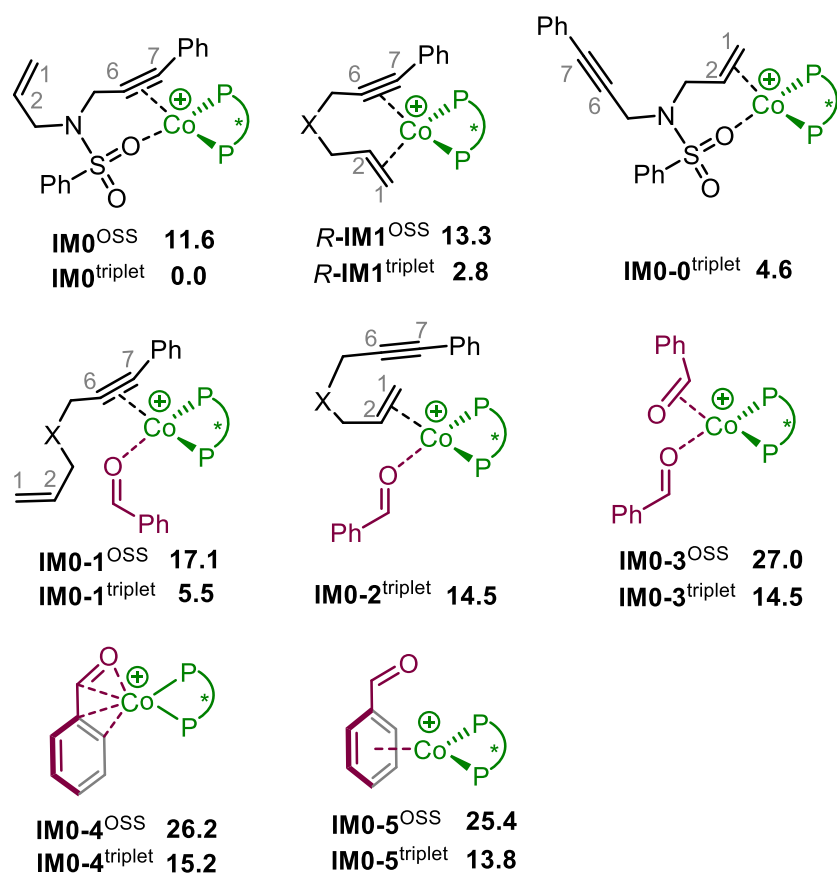

**Scheme S1.** Possible complexations between cobalt catalyst and reactants. Energies are given in kcal/mol.

## 2. C(acyl)-H bond cleavage of benzaldehyde

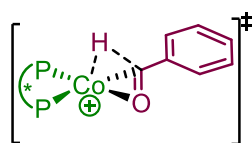

**TS7<sup>CSS</sup>**  
40.4

**Scheme S2.** C(acyl)-H bond cleavage via the C-H oxidative addition. Energies are given in kcal/mol.

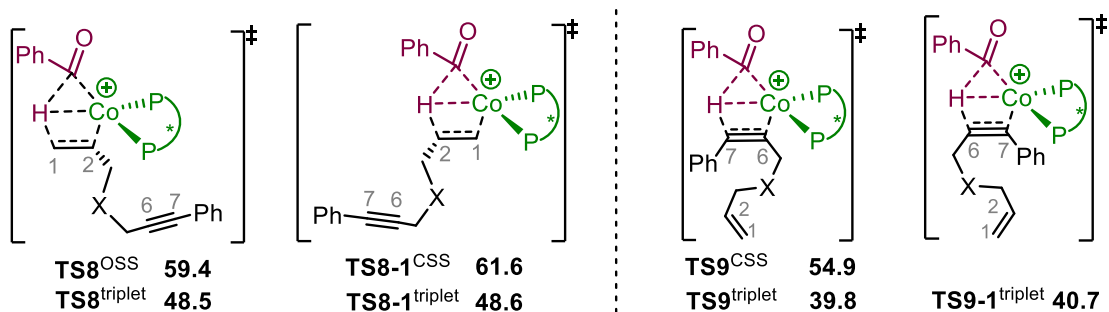

**Scheme S3.** C(acyl)-H bond cleavage via the ligand-to-ligand hydrogen transfer. Energies are given in kcal/mol.

### 3. Calculated most favorable pathway with different spin state

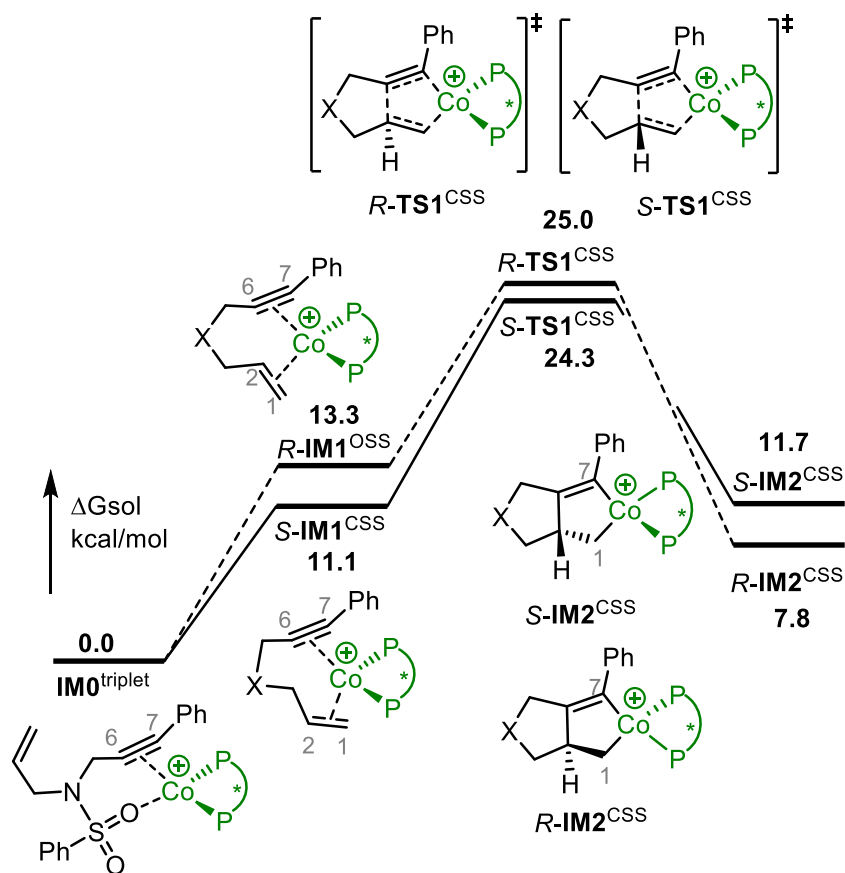

**Scheme S4.** Oxidative cyclization via the singlet spin state. Energies are given in kcal/mol.

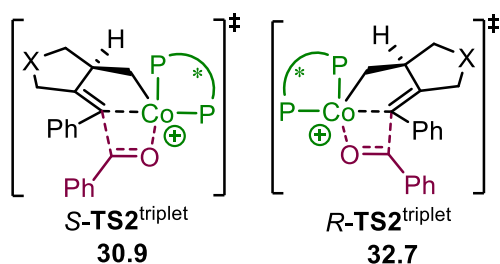

**Scheme S5.** Migratory insertion via the triplet spin state. Energies are given in kcal/mol.

#### 4. $\sigma$ -bond metathesis between the Co-C and C(acyl)-H bonds

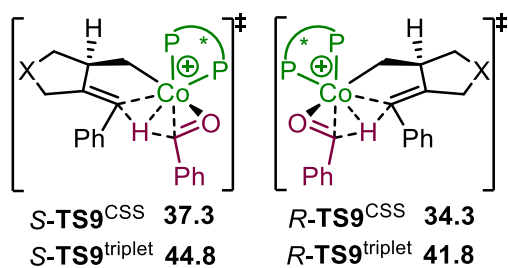

**Scheme S6.**  $\sigma$ -bond metathesis between the Co-C( $sp^2$ ) and C(acyl)-H bonds. Energies are given in kcal/mol.

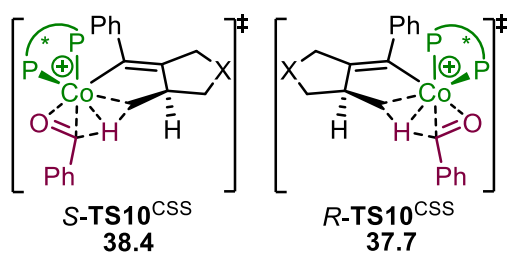

**Scheme S7.**  $\sigma$ -bond metathesis between the Co-C( $sp^3$ ) and C(acyl)-H bonds. Energies are given in kcal/mol.

## 5. C-O double bond insertion into the Co-C(sp<sup>3</sup>) bond

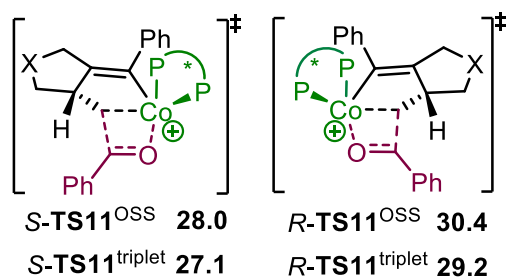

**Scheme S8.** C-O double bond insertion into the Co-C(sp<sup>3</sup>) bond. Energies are given in kcal/mol.

## 6. Possible pathways leading to hydroarylation product

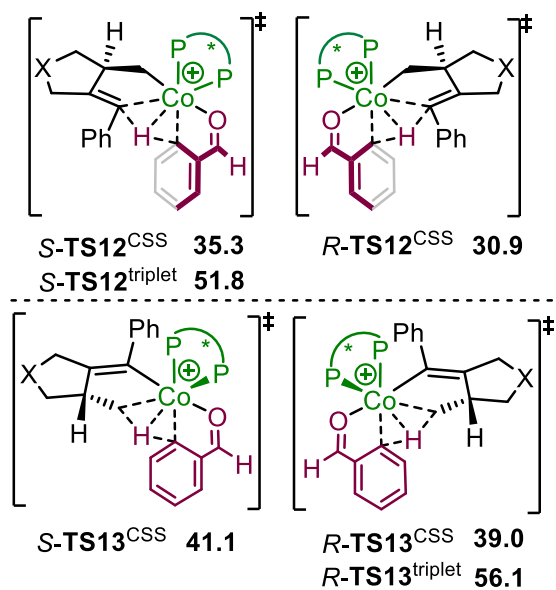

**Scheme S9.** Hydroarylation initiated by the oxidative cyclization. Energies are given in kcal/mol.

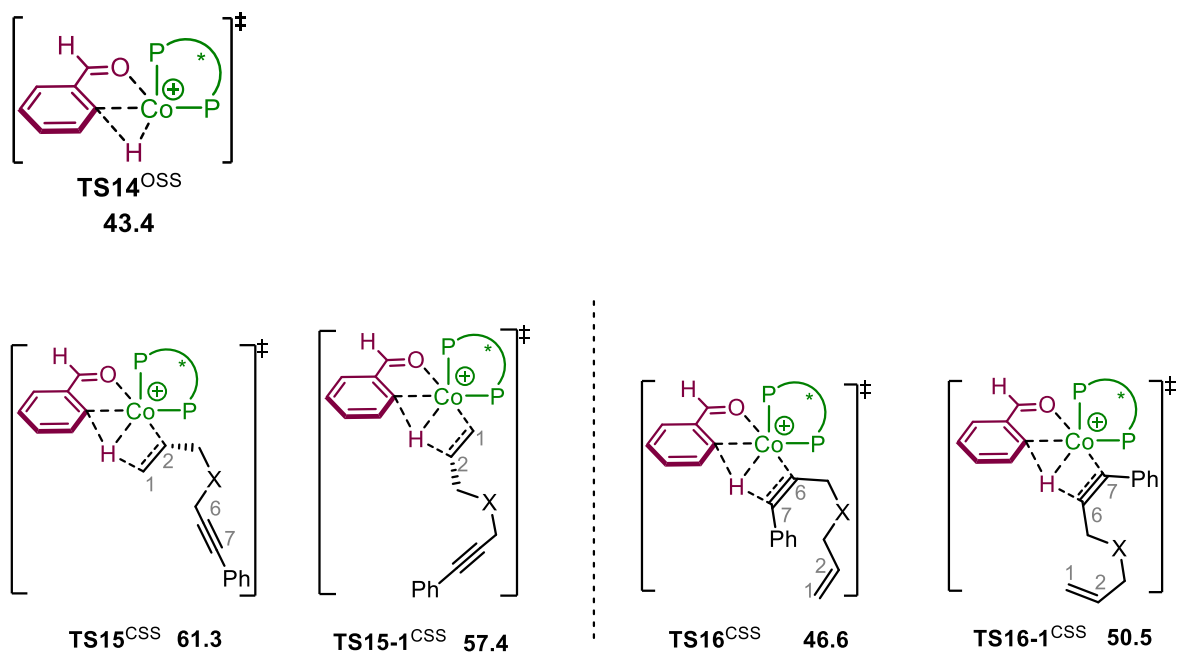

**Scheme S10.** Hydroarylation initiated by the C(aryl)-H bond cleavage. Energies are given in kcal/mol.

## 7. Table of calculated energies and energy corrections

| <b>Stationary point</b>         | <b>Single-point energy-B3LYP-SMD def2-TZVPP (a.u.)</b> | <b>Thermal correction to Gibbs free energy at 298.15 K (a.u.)</b> |
|---------------------------------|--------------------------------------------------------|-------------------------------------------------------------------|
| <b>1a</b>                       | -1299.927801                                           | 0.26187                                                           |
| <b>2a</b>                       | -345.747569                                            | 0.079688                                                          |
| <b>S-3a</b>                     | -1645.757774                                           | 0.373011                                                          |
| <b>R-3a</b>                     | -1645.757774                                           | 0.373011                                                          |
| <b>IM0</b> <sup>triplet</sup>   | -4489.269595                                           | 0.747226                                                          |
| <b>S-IM1</b> <sup>triplet</sup> | -4489.266931                                           | 0.748033                                                          |
| <b>R-IM1</b> <sup>triplet</sup> | -4489.267950                                           | 0.749995                                                          |
| <b>S-TS1</b> <sup>triplet</sup> | -4489.240069                                           | 0.749232                                                          |
| <b>R-TS1</b> <sup>triplet</sup> | -4489.238183                                           | 0.749374                                                          |
| <b>S-IM2</b> <sup>triplet</sup> | -4489.258693                                           | 0.749289                                                          |
| <b>R-IM2</b> <sup>triplet</sup> | -4489.261522                                           | 0.750287                                                          |
| <b>S-TS2</b> <sup>CSS</sup>     | -4835.022884                                           | 0.863673                                                          |
| <b>R-TS2</b> <sup>CSS</sup>     | -4835.015103                                           | 0.863011                                                          |
| <b>S-TS2</b> <sup>triplet</sup> | -4835.001505                                           | 0.848381                                                          |
| <b>R-TS2</b> <sup>triplet</sup> | -4834.998599                                           | 0.848554                                                          |
| <b>S-IM3</b> <sup>triplet</sup> | -4835.040434                                           | 0.845354                                                          |
| <b>R-IM3</b> <sup>triplet</sup> | -4835.041381                                           | 0.845294                                                          |
| <b>S-IM3</b> <sup>CSS</sup>     | -4835.044834                                           | 0.865736                                                          |
| <b>R-IM3</b> <sup>CSS</sup>     | -4835.044407                                           | 0.866174                                                          |
| <b>S-TS3</b> <sup>CSS</sup>     | -4835.032651                                           | 0.860851                                                          |
| <b>R-TS3</b> <sup>CSS</sup>     | -4835.030894                                           | 0.859748                                                          |
| <b>S-IM4</b> <sup>CSS</sup>     | -4835.038632                                           | 0.858812                                                          |
| <b>R-IM4</b> <sup>CSS</sup>     | -4835.034208                                           | 0.860737                                                          |
| <b>S-TS4</b> <sup>OSS</sup>     | -4835.022539                                           | 0.858656                                                          |
| <b>R-TS4</b> <sup>OSS</sup>     | -4835.016845                                           | 0.857967                                                          |
| <b>S-TS5</b> <sup>triplet</sup> | -4258.056822                                           | 0.671895                                                          |
| <b>R-TS5</b> <sup>triplet</sup> | -4258.055075                                           | 0.670912                                                          |
| <b>S-TS6</b> <sup>CSS</sup>     | -4603.844826                                           | 0.783884                                                          |
| <b>R-TS6</b> <sup>CSS</sup>     | -4603.842112                                           | 0.784551                                                          |



## 8. Cartesian coordinates

### 1a

|   |             |             |              |
|---|-------------|-------------|--------------|
| C | -2.52181000 | 2.78223700  | -6.70928000  |
| C | -2.53005500 | 3.45588600  | -7.96739700  |
| C | -3.55648900 | 4.36726800  | -8.27855600  |
| C | -1.50924100 | 3.22623300  | -8.90832800  |
| C | -3.55882700 | 5.03032400  | -9.50240600  |
| H | -4.34399200 | 4.54269800  | -7.55298500  |
| C | -1.51851900 | 3.89479300  | -10.12919000 |
| H | -0.71820800 | 2.52421700  | -8.66722800  |
| C | -2.54121400 | 4.79718100  | -10.43010700 |
| H | -4.35541400 | 5.73104100  | -9.73333900  |
| H | -0.72605700 | 3.71131500  | -10.84829700 |
| H | -2.54509800 | 5.31644100  | -11.38355800 |
| C | -2.51267700 | 2.21478900  | -5.63922800  |
| C | -2.51379900 | 1.58354700  | -4.32464200  |
| H | -3.49475500 | 1.74140800  | -3.85107100  |
| H | -2.34594600 | 0.50808100  | -4.41836800  |
| N | -1.42714900 | 2.12162500  | -3.48228200  |
| C | -1.39506500 | 3.59034500  | -3.31067300  |
| H | -0.56706200 | 3.80711900  | -2.63295100  |
| H | -1.14444500 | 4.01013700  | -4.28859300  |
| C | -2.69266900 | 4.17864100  | -2.81847300  |
| H | -2.97412100 | 3.95857200  | -1.79119200  |
| C | -3.49464200 | 4.91728800  | -3.58488000  |
| H | -3.24258800 | 5.13376300  | -4.62000300  |
| H | -4.42609900 | 5.32955400  | -3.20819800  |
| S | -0.94282700 | 1.15925700  | -2.19316500  |
| O | -0.92032000 | -0.21535400 | -2.69736900  |
| O | 0.23951800  | 1.80333000  | -1.61837400  |
| C | -2.24805200 | 1.25769900  | -0.96910600  |
| C | -3.38613000 | 0.46259700  | -1.11787000  |
| C | -2.12902000 | 2.17067400  | 0.08016600   |
| C | -4.43362600 | 0.60529200  | -0.20844500  |
| H | -3.43307700 | -0.26806300 | -1.91722500  |
| C | -3.18139400 | 2.30121400  | 0.98534100   |
| H | -1.21944700 | 2.75185200  | 0.18048100   |
| C | -4.33435200 | 1.52650400  | 0.83630200   |
| H | -5.32315800 | -0.00814600 | -0.31118300  |
| H | -3.09940400 | 3.00323200  | 1.80914700   |
| H | -5.15213400 | 1.63296700  | 1.54227700   |

### 2a

|   |            |             |            |
|---|------------|-------------|------------|
| C | 0.14850900 | -0.42331400 | 0.49248200 |
|---|------------|-------------|------------|

|             |             |             |             |
|-------------|-------------|-------------|-------------|
| C           | 1.45980900  | -0.45643300 | 0.01364900  |
| C           | 2.06780500  | 0.70897100  | -0.46771800 |
| C           | 1.36493500  | 1.90817900  | -0.47054900 |
| C           | 0.04755300  | 1.94622300  | 0.00955400  |
| C           | -0.55703400 | 0.77857000  | 0.49017800  |
| H           | -0.31843200 | -1.32990400 | 0.86459100  |
| H           | 2.01119800  | -1.39206000 | 0.01475600  |
| H           | 3.08771400  | 0.67435100  | -0.83829000 |
| H           | 1.80745000  | 2.82876600  | -0.83679500 |
| H           | -1.57869400 | 0.81829300  | 0.86030600  |
| C           | -0.70662300 | 3.21814100  | 0.00980400  |
| H           | -1.74178000 | 3.14067500  | 0.41153800  |
| O           | -0.26900100 | 4.28163300  | -0.38651200 |
| <b>S-3a</b> |             |             |             |
| C           | -1.67946600 | 0.45108000  | 0.91119200  |
| C           | 0.08342300  | 1.99659100  | 0.91550400  |
| C           | -2.30247300 | 1.76440700  | 0.37901200  |
| H           | -2.07093100 | -0.44061700 | 0.41958800  |
| H           | -1.85302000 | 0.34462500  | 1.98866200  |
| H           | 0.19855200  | 2.14774300  | 1.99646900  |
| H           | 1.02471600  | 2.27001100  | 0.43875300  |
| N           | -0.21733500 | 0.56126600  | 0.71936600  |
| S           | 0.33315700  | -0.04566100 | -0.77925600 |
| O           | -0.63044200 | 0.19467700  | -1.86431200 |
| O           | 1.71977600  | 0.41435700  | -0.90674800 |
| C           | 0.30833700  | -1.79649300 | -0.41720500 |
| C           | 1.15205500  | -2.29699400 | 0.57608900  |
| C           | -0.53039200 | -2.62666900 | -1.15767400 |
| C           | 1.14393700  | -3.66480100 | 0.83540300  |
| H           | 1.79402300  | -1.62145600 | 1.12968200  |
| C           | -0.52876000 | -3.99641800 | -0.88822500 |
| H           | -1.16197400 | -2.19491200 | -1.92558300 |
| C           | 0.30432000  | -4.51193700 | 0.10505600  |
| H           | 1.79209400  | -4.07217100 | 1.60482900  |
| H           | -1.17649500 | -4.65778900 | -1.45481900 |
| C           | -1.12770000 | 2.73492500  | 0.37744900  |
| C           | -1.11100100 | 4.00176600  | -0.08755100 |
| C           | 0.12203900  | 4.83163600  | -0.08790300 |
| C           | 0.93509300  | 4.95999000  | 1.04843100  |
| C           | 0.49197000  | 5.51981100  | -1.25457400 |
| C           | 2.08952800  | 5.74111300  | 1.01709700  |
| H           | 0.64542600  | 4.46548200  | 1.97013000  |
| C           | 1.64510200  | 6.29948900  | -1.28731500 |

|   |             |             |             |
|---|-------------|-------------|-------------|
| H | -0.12686300 | 5.43095700  | -2.14223200 |
| C | 2.44921900  | 6.41289200  | -0.15147400 |
| H | 2.70394100  | 5.82964800  | 1.90814300  |
| H | 1.91812800  | 6.81738800  | -2.20170700 |
| H | 3.34741700  | 7.02217800  | -0.17679300 |
| C | -2.33562300 | 4.58730200  | -0.74269700 |
| O | -3.06166100 | 3.90330900  | -1.45617400 |
| C | -2.67114800 | 6.02869700  | -0.51197800 |
| C | -2.19181600 | 6.75242300  | 0.58874500  |
| C | -3.55987900 | 6.64506200  | -1.40513400 |
| C | -2.59017000 | 8.07284400  | 0.78671600  |
| H | -1.51134900 | 6.28502900  | 1.28980200  |
| C | -3.94345200 | 7.96871600  | -1.21612900 |
| H | -3.93651000 | 6.06175900  | -2.23824000 |
| C | -3.45883600 | 8.68533600  | -0.11835700 |
| H | -2.21929100 | 8.62520200  | 1.64466600  |
| H | -4.62207000 | 8.44290300  | -1.91871400 |
| H | -3.75938800 | 9.71809800  | 0.03197900  |
| C | -3.50564500 | 2.21225800  | 1.21700400  |
| H | -3.20350500 | 2.43664500  | 2.24608400  |
| H | -3.98012600 | 3.09761500  | 0.79240500  |
| H | -4.25862900 | 1.41756400  | 1.25260600  |
| H | -2.61333300 | 1.62166800  | -0.65790400 |
| H | 0.30247600  | -5.57777400 | 0.31199900  |

**R-3a**

|   |             |             |             |
|---|-------------|-------------|-------------|
| C | -1.67946600 | 0.45108000  | -0.91119200 |
| C | 0.08342300  | 1.99659100  | -0.91550400 |
| C | -2.30247300 | 1.76440700  | -0.37901200 |
| H | -2.07093100 | -0.44061700 | -0.41958800 |
| H | -1.85302000 | 0.34462500  | -1.98866200 |
| H | 0.19855200  | 2.14774300  | -1.99646900 |
| H | 1.02471600  | 2.27001100  | -0.43875300 |
| N | -0.21733500 | 0.56126600  | -0.71936600 |
| S | 0.33315700  | -0.04566100 | 0.77925600  |
| O | -0.63044200 | 0.19467700  | 1.86431200  |
| O | 1.71977600  | 0.41435700  | 0.90674800  |
| C | 0.30833700  | -1.79649300 | 0.41720500  |
| C | 1.15205500  | -2.29699400 | -0.57608900 |
| C | -0.53039200 | -2.62666900 | 1.15767400  |
| C | 1.14393700  | -3.66480100 | -0.83540300 |
| H | 1.79402300  | -1.62145600 | -1.12968200 |
| C | -0.52876000 | -3.99641800 | 0.88822500  |
| H | -1.16197400 | -2.19491200 | 1.92558300  |

|   |             |             |             |
|---|-------------|-------------|-------------|
| C | 0.30432000  | -4.51193700 | -0.10505600 |
| H | 1.79209400  | -4.07217100 | -1.60482900 |
| H | -1.17649500 | -4.65778900 | 1.45481900  |
| C | -1.12770000 | 2.73492500  | -0.37744900 |
| C | -1.11100100 | 4.00176600  | 0.08755100  |
| C | 0.12203900  | 4.83163600  | 0.08790300  |
| C | 0.93509300  | 4.95999000  | -1.04843100 |
| C | 0.49197000  | 5.51981100  | 1.25457400  |
| C | 2.08952800  | 5.74111300  | -1.01709700 |
| H | 0.64542600  | 4.46548200  | -1.97013000 |
| C | 1.64510200  | 6.29948900  | 1.28731500  |
| H | -0.12686300 | 5.43095700  | 2.14223200  |
| C | 2.44921900  | 6.41289200  | 0.15147400  |
| H | 2.70394100  | 5.82964800  | -1.90814300 |
| H | 1.91812800  | 6.81738800  | 2.20170700  |
| H | 3.34741700  | 7.02217800  | 0.17679300  |
| C | -2.33562300 | 4.58730200  | 0.74269700  |
| O | -3.06166100 | 3.90330900  | 1.45617400  |
| C | -2.67114800 | 6.02869700  | 0.51197800  |
| C | -2.19181600 | 6.75242300  | -0.58874500 |
| C | -3.55987900 | 6.64506200  | 1.40513400  |
| C | -2.59017000 | 8.07284400  | -0.78671600 |
| H | -1.51134900 | 6.28502900  | -1.28980200 |
| C | -3.94345200 | 7.96871600  | 1.21612900  |
| H | -3.93651000 | 6.06175900  | 2.23824000  |
| C | -3.45883600 | 8.68533600  | 0.11835700  |
| H | -2.21929100 | 8.62520200  | -1.64466600 |
| H | -4.62207000 | 8.44290300  | 1.91871400  |
| H | -3.75938800 | 9.71809800  | -0.03197900 |
| C | -3.50564500 | 2.21225800  | -1.21700400 |
| H | -3.20350500 | 2.43664500  | -2.24608400 |
| H | -3.98012600 | 3.09761500  | -0.79240500 |
| H | -4.25862900 | 1.41756400  | -1.25260600 |
| H | -2.61333300 | 1.62166800  | 0.65790400  |
| H | 0.30247600  | -5.57777400 | -0.31199900 |

S\*\*2 before annihilation      2.0182,      after      2.0002

**IM0**<sup>triplet</sup>

|   |             |             |            |
|---|-------------|-------------|------------|
| C | 0.65797200  | -1.98075700 | 2.22537800 |
| C | -0.01619600 | -3.11706400 | 1.41912200 |
| C | 2.19511100  | -1.82269900 | 2.15552300 |
| H | -1.03854800 | -3.18848700 | 1.81084800 |
| H | 0.17322100  | -1.02554100 | 1.99562900 |
| H | 0.42706100  | -2.17353500 | 3.28070100 |

|   |             |             |             |
|---|-------------|-------------|-------------|
| H | 2.64123000  | -2.81893900 | 2.24138400  |
| P | 2.82241100  | -1.20961800 | 0.49753200  |
| P | -0.19736000 | -2.64914200 | -0.38205600 |
| C | 4.58821400  | -1.70930400 | 0.42429200  |
| C | 5.24255300  | -1.51857200 | -0.80652700 |
| C | 5.29249100  | -2.31653100 | 1.47119900  |
| C | 6.57374800  | -1.89427500 | -0.97439200 |
| H | 4.69887000  | -1.07719000 | -1.63675400 |
| C | 6.62376000  | -2.70550200 | 1.29894300  |
| H | 4.81618100  | -2.49408300 | 2.42766200  |
| C | 7.27012100  | -2.48848300 | 0.08234600  |
| H | 7.06717800  | -1.72656900 | -1.92690700 |
| H | 7.15484500  | -3.17325200 | 2.12199900  |
| H | 8.30804100  | -2.77986100 | -0.04458900 |
| C | 2.86959600  | 0.61725600  | 0.66123400  |
| C | 4.05783100  | 1.35664400  | 0.58783200  |
| C | 1.65066300  | 1.30190600  | 0.79588700  |
| C | 4.02365600  | 2.75194000  | 0.63456800  |
| H | 5.01059900  | 0.84816700  | 0.49344400  |
| C | 1.62155100  | 2.69286800  | 0.86013200  |
| H | 0.71692100  | 0.75433900  | 0.83598800  |
| C | 2.80848800  | 3.42391700  | 0.77226600  |
| H | 4.95142300  | 3.31243100  | 0.57372000  |
| H | 0.66975800  | 3.20372600  | 0.96931300  |
| H | 2.78697300  | 4.50828400  | 0.81561000  |
| C | -1.39065200 | -1.25689900 | -0.29545000 |
| C | -1.02674400 | -0.02424400 | -0.85316500 |
| C | -2.64693600 | -1.38182200 | 0.31746300  |
| C | -1.89121200 | 1.07001400  | -0.78456500 |
| H | -0.06342900 | 0.08497500  | -1.33707400 |
| C | -3.51060100 | -0.29100400 | 0.38417300  |
| H | -2.96021600 | -2.33436400 | 0.73274400  |
| C | -3.13185200 | 0.93866200  | -0.16261800 |
| H | -1.59014700 | 2.01675400  | -1.22048400 |
| H | -4.48072900 | -0.39874000 | 0.85910500  |
| H | -3.80707800 | 1.78688400  | -0.10798600 |
| C | -1.13615000 | -4.01168300 | -1.16258900 |
| C | -2.06206500 | -4.82003700 | -0.48964800 |
| C | -0.90576800 | -4.23128800 | -2.52819400 |
| C | -2.74428500 | -5.82663400 | -1.17190900 |
| H | -2.24918800 | -4.67608800 | 0.56958500  |
| C | -1.59779100 | -5.22843300 | -3.21344000 |
| H | -0.17270100 | -3.61714500 | -3.04523500 |
| C | -2.51612900 | -6.03025100 | -2.53419600 |

|    |             |             |             |
|----|-------------|-------------|-------------|
| H  | -3.45524800 | -6.45176800 | -0.64092500 |
| H  | -1.41891400 | -5.38385000 | -4.27324600 |
| H  | -3.05125800 | -6.81285600 | -3.06260900 |
| Co | 1.80632600  | -2.12620700 | -1.38742600 |
| C  | 2.24878800  | -1.36242000 | -3.35141900 |
| C  | 1.61647800  | -0.07832200 | -3.42966900 |
| C  | 0.42084600  | 0.07277300  | -4.15823800 |
| C  | 2.15149900  | 1.01786300  | -2.72658500 |
| C  | -0.22250400 | 1.30502200  | -4.18094400 |
| H  | 0.00671200  | -0.77848400 | -4.68742400 |
| C  | 1.49622700  | 2.24534200  | -2.75501500 |
| H  | 3.06174200  | 0.90015400  | -2.15177100 |
| C  | 0.31183200  | 2.39098500  | -3.48052900 |
| H  | -1.14489500 | 1.41885900  | -4.74053400 |
| H  | 1.90809300  | 3.07956600  | -2.19850700 |
| H  | -0.19641000 | 3.34982400  | -3.50140400 |
| C  | 2.77475600  | -2.47582300 | -3.34258400 |
| C  | 3.50249800  | -3.73921700 | -3.54904700 |
| H  | 3.76841500  | -3.86564400 | -4.60291900 |
| H  | 4.44351200  | -3.70617900 | -2.98867700 |
| N  | 2.71772000  | -4.91066300 | -3.15445800 |
| C  | 1.97881800  | -5.66759200 | -4.16373000 |
| H  | 1.23088600  | -6.27181300 | -3.64305400 |
| H  | 1.41006900  | -4.94777000 | -4.76868200 |
| C  | 2.84438600  | -6.52398400 | -5.04987800 |
| H  | 2.31891600  | -6.98013200 | -5.88760200 |
| C  | 4.14579900  | -6.74914900 | -4.87857600 |
| S  | 2.70915300  | -5.33744800 | -1.55301400 |
| O  | 2.79456500  | -4.05215900 | -0.81268900 |
| O  | 1.59693000  | -6.25881900 | -1.34274900 |
| C  | 4.24347000  | -6.16804000 | -1.21340600 |
| C  | 5.34103400  | -5.42008500 | -0.78193600 |
| C  | 4.32244000  | -7.54425700 | -1.44135000 |
| C  | 6.55487100  | -6.07694600 | -0.58311900 |
| H  | 5.23910600  | -4.36108600 | -0.58501700 |
| C  | 5.54226500  | -8.18308600 | -1.23382600 |
| H  | 3.44613400  | -8.09489200 | -1.76302700 |
| C  | 6.65572300  | -7.45057300 | -0.81081000 |
| H  | 7.41461200  | -5.51070600 | -0.24180800 |
| H  | 5.62348200  | -9.25236300 | -1.39791300 |
| H  | 4.70082800  | -7.38601100 | -5.55872100 |
| H  | 4.69826700  | -6.31875100 | -4.04917900 |
| C  | 0.66775900  | -4.47512800 | 1.61505700  |
| H  | 0.12532100  | -5.27600000 | 1.10953700  |

|   |            |             |             |
|---|------------|-------------|-------------|
| H | 1.68259300 | -4.47674000 | 1.21831500  |
| H | 0.71191600 | -4.71396800 | 2.68339900  |
| C | 2.67631100 | -0.94897500 | 3.32448600  |
| H | 2.16055800 | 0.01484400  | 3.32481900  |
| H | 2.46557500 | -1.44604700 | 4.27689700  |
| H | 3.74764400 | -0.74089900 | 3.27686800  |
| H | 7.60263800 | -7.95627100 | -0.65129300 |

S\*\*2 before annihilation      2.0266,      after      2.0004

*S-IM1*<sup>triplet</sup>

|   |             |             |             |
|---|-------------|-------------|-------------|
| C | 0.81180300  | -2.22962100 | 2.74217800  |
| C | -0.08098800 | -3.11615100 | 1.84056000  |
| C | 2.32860200  | -2.14695300 | 2.46351500  |
| H | -1.07068400 | -3.13243900 | 2.31215200  |
| H | 0.41910000  | -1.20988800 | 2.79202900  |
| H | 0.70474600  | -2.63563600 | 3.75580900  |
| H | 2.69034200  | -3.13519200 | 2.15962100  |
| P | 2.69738900  | -1.03927500 | 0.99107500  |
| P | -0.37774200 | -2.37758000 | 0.14563800  |
| C | 4.52119700  | -0.90739600 | 0.97551700  |
| C | 5.15353600  | 0.29691500  | 0.62939100  |
| C | 5.30857100  | -2.05744100 | 1.15084800  |
| C | 6.53844700  | 0.34751300  | 0.46617800  |
| H | 4.56317400  | 1.19567600  | 0.48601100  |
| C | 6.69251800  | -2.00273600 | 0.98839700  |
| H | 4.84702900  | -3.00287400 | 1.41990700  |
| C | 7.31064400  | -0.79976400 | 0.64641900  |
| H | 7.01381000  | 1.28571600  | 0.19791100  |
| H | 7.28781700  | -2.89923400 | 1.12924500  |
| H | 8.38423300  | -0.76011500 | 0.51262900  |
| C | 2.09434700  | 0.61471700  | 1.49060300  |
| C | 2.69981500  | 1.39684800  | 2.48896100  |
| C | 0.93596000  | 1.09788600  | 0.86313800  |
| C | 2.14667800  | 2.62361000  | 2.85256000  |
| H | 3.61035700  | 1.05603800  | 2.96898700  |
| C | 0.37541300  | 2.31908900  | 1.23599800  |
| H | 0.45511600  | 0.51602900  | 0.08667900  |
| C | 0.98097300  | 3.08338700  | 2.23305200  |
| H | 2.62421400  | 3.22152400  | 3.62238700  |
| H | -0.53355900 | 2.65991700  | 0.75068400  |
| H | 0.55166300  | 4.03629500  | 2.52599100  |
| C | -1.63905800 | -1.07347600 | 0.46160000  |
| C | -2.23588100 | -0.47361100 | -0.65819100 |
| C | -2.02314600 | -0.64570400 | 1.74038400  |

|    |             |             |             |
|----|-------------|-------------|-------------|
| C  | -3.18625700 | 0.53235100  | -0.50034900 |
| H  | -1.97017700 | -0.80067200 | -1.65664900 |
| C  | -2.96761800 | 0.36974600  | 1.89479500  |
| H  | -1.60103000 | -1.09227300 | 2.63069200  |
| C  | -3.54997000 | 0.96403300  | 0.77639000  |
| H  | -3.64001500 | 0.97679900  | -1.37899400 |
| H  | -3.25014700 | 0.68913500  | 2.89292900  |
| H  | -4.28824200 | 1.75028800  | 0.89804500  |
| C  | -1.35957900 | -3.62768700 | -0.76131100 |
| C  | -0.95979000 | -3.99865400 | -2.05162500 |
| C  | -1.69605900 | -4.93378600 | -2.78069400 |
| H  | -0.07443800 | -3.54538100 | -2.48893600 |
| C  | -3.25106700 | -5.13238500 | -0.93777400 |
| C  | -2.83831100 | -5.50518500 | -2.22063300 |
| H  | -1.37850200 | -5.21492400 | -3.77990700 |
| H  | -4.14603100 | -5.56975300 | -0.50679800 |
| H  | -3.41116900 | -6.23564300 | -2.78280400 |
| Co | 1.59740800  | -1.71612400 | -0.97196000 |
| C  | 1.61864300  | -0.25128300 | -2.62313900 |
| C  | 0.31480400  | 0.19413400  | -3.01803100 |
| C  | -0.14994700 | 1.46157900  | -2.62305000 |
| C  | -0.48040900 | -0.61274200 | -3.85401600 |
| C  | -1.38344800 | 1.91770400  | -3.07787100 |
| H  | 0.46496500  | 2.07718700  | -1.97608200 |
| C  | -1.71612200 | -0.14924400 | -4.29473200 |
| H  | -0.11406400 | -1.58504200 | -4.16466900 |
| C  | -2.16736200 | 1.11751900  | -3.91235400 |
| H  | -1.73452500 | 2.90039500  | -2.78060900 |
| H  | -2.32295700 | -0.77059100 | -4.94500600 |
| H  | -3.12623600 | 1.48040500  | -4.26827200 |
| C  | 2.81105000  | -0.50077500 | -2.44809400 |
| C  | 4.26592100  | -0.59600800 | -2.64440900 |
| H  | 4.55284500  | 0.14343100  | -3.39673600 |
| H  | 4.79660600  | -0.37697400 | -1.71061100 |
| N  | 4.60997200  | -1.91968800 | -3.16555900 |
| C  | 4.42345000  | -3.04321800 | -2.25117100 |
| H  | 4.93961700  | -3.89955500 | -2.69553800 |
| H  | 4.86657900  | -2.84428600 | -1.26718200 |
| S  | 5.92158000  | -1.98791000 | -4.23739000 |
| O  | 5.96024900  | -3.37189400 | -4.70651000 |
| O  | 5.74768300  | -0.84505000 | -5.13220700 |
| C  | 7.39352700  | -1.69811200 | -3.26224700 |
| C  | 8.03977800  | -2.78262500 | -2.66479300 |
| C  | 7.88469300  | -0.39635800 | -3.14349000 |



|   |             |             |             |
|---|-------------|-------------|-------------|
| C | 9.20601000  | -2.55316100 | -1.93640200 |
| H | 7.65892200  | -3.78683800 | -2.81069200 |
| C | 9.05341600  | -0.18157800 | -2.41415300 |
| H | 7.38239600  | 0.41789800  | -3.65283300 |
| H | 9.73083100  | -3.38823900 | -1.48372300 |
| H | 9.45935600  | 0.82147600  | -2.33164600 |
| C | -2.52021200 | -4.19407100 | -0.21316700 |
| H | -2.85893300 | -3.89154900 | 0.77325100  |
| C | 2.97441400  | -3.43045900 | -2.11714100 |
| C | 2.44608600  | -3.97210600 | -0.99526400 |
| H | 1.49481600  | -4.48776700 | -1.01030600 |
| H | 3.04448400  | -4.06202400 | -0.09378000 |
| C | 9.71432700  | -1.25730200 | -1.81677000 |
| H | 10.63501500 | -1.08750600 | -1.26707300 |
| C | 3.05990100  | -1.72919000 | 3.74614000  |
| H | 2.65254700  | -0.79273900 | 4.13692400  |
| H | 2.92675700  | -2.49599700 | 4.51607800  |
| H | 4.13134500  | -1.59537200 | 3.58510400  |
| C | 0.40685000  | -4.56866300 | 1.78419900  |
| H | 1.39013200  | -4.66164300 | 1.32322100  |
| H | 0.48117600  | -4.96563100 | 2.80182300  |
| H | -0.28606700 | -5.20163600 | 1.22657700  |
| H | 2.41286200  | -3.44215800 | -3.05023400 |

S\*\*2 before annihilation      2.0242,      after      2.0003

**R-IM1**<sup>triplet</sup>

|   |             |             |            |
|---|-------------|-------------|------------|
| C | -0.66295400 | -1.65690500 | 2.59384000 |
| C | -0.80612500 | -3.01909600 | 1.87163000 |
| C | 0.73371700  | -1.24245600 | 3.10972000 |
| H | -1.87999300 | -3.22516400 | 1.81513800 |
| H | -1.08784800 | -0.85404600 | 1.98063500 |
| H | -1.31068000 | -1.71702500 | 3.47703000 |
| H | 1.24705100  | -2.13565400 | 3.47911600 |
| P | 1.87369100  | -0.58468300 | 1.76382800 |
| P | -0.24240600 | -2.82617400 | 0.09678700 |
| C | 3.55738800  | -0.69377800 | 2.48902400 |
| C | 4.63910700  | -0.39347600 | 1.64137800 |
| C | 3.83034300  | -1.11723300 | 3.79785900 |
| C | 5.95044300  | -0.47998200 | 2.10138600 |
| H | 4.45817600  | -0.10303800 | 0.61111500 |
| C | 5.14742000  | -1.22036800 | 4.25158200 |
| H | 3.02616200  | -1.37070700 | 4.47731000 |
| C | 6.20922200  | -0.89487700 | 3.40938500 |
| H | 6.76729200  | -0.23454800 | 1.43296900 |

|    |             |             |             |
|----|-------------|-------------|-------------|
| H  | 5.33902800  | -1.55139900 | 5.26733700  |
| H  | 7.23134900  | -0.96985500 | 3.76615400  |
| C  | 1.50015000  | 1.20740800  | 1.76702800  |
| C  | 2.28634900  | 2.14165100  | 2.45350900  |
| C  | 0.35171900  | 1.64117900  | 1.08924300  |
| C  | 1.92559300  | 3.48918100  | 2.46021000  |
| H  | 3.17633400  | 1.81848300  | 2.98243600  |
| C  | -0.01037200 | 2.98560500  | 1.10513800  |
| H  | -0.25292400 | 0.92919900  | 0.54038400  |
| C  | 0.77748600  | 3.91295500  | 1.78979700  |
| H  | 2.53959800  | 4.20722800  | 2.99506600  |
| H  | -0.89889200 | 3.30979900  | 0.57305400  |
| H  | 0.49929800  | 4.96207800  | 1.79779800  |
| C  | -1.61252600 | -1.80352400 | -0.56985000 |
| C  | -1.32817600 | -0.57846500 | -1.18562700 |
| C  | -2.95183600 | -2.21005600 | -0.45194000 |
| C  | -2.35812600 | 0.23838700  | -1.65542700 |
| H  | -0.29977700 | -0.26386800 | -1.29825400 |
| C  | -3.97959700 | -1.39851000 | -0.92739200 |
| H  | -3.19349100 | -3.16999000 | -0.00562200 |
| C  | -3.68489700 | -0.16952800 | -1.52492200 |
| H  | -2.11933800 | 1.19034500  | -2.11956100 |
| H  | -5.01072700 | -1.72390600 | -0.83351800 |
| H  | -4.48838300 | 0.46220300  | -1.88989800 |
| C  | -0.41916100 | -4.41728100 | -0.80522400 |
| C  | -1.04192600 | -4.43162900 | -2.06533600 |
| C  | -1.02234300 | -5.58141200 | -2.85583100 |
| H  | -1.54682100 | -3.54448200 | -2.43021200 |
| C  | 0.23510700  | -6.73656900 | -1.15383700 |
| C  | -0.38526900 | -6.73726400 | -2.40410100 |
| H  | -1.51072000 | -5.57217800 | -3.82515700 |
| H  | 0.72959600  | -7.63177400 | -0.78999800 |
| H  | -0.37191300 | -7.63062100 | -3.01962800 |
| Co | 1.85766600  | -1.84352600 | -0.22109600 |
| C  | 2.13982500  | -0.18385100 | -1.90751300 |
| C  | 2.04886700  | 1.23642500  | -1.80033700 |
| C  | 1.03396400  | 1.89309800  | -2.52620900 |
| C  | 2.94217600  | 1.99240400  | -1.02242400 |
| C  | 0.92345900  | 3.27863000  | -2.47020300 |
| H  | 0.35350300  | 1.30832000  | -3.13602100 |
| C  | 2.82425700  | 3.37608200  | -0.97563700 |
| H  | 3.71625100  | 1.49049900  | -0.45877600 |
| C  | 1.81605800  | 4.02168900  | -1.69491400 |
| H  | 0.14496000  | 3.77946900  | -3.03656100 |

|   |             |             |             |
|---|-------------|-------------|-------------|
| H | 3.50929000  | 3.95173100  | -0.36324800 |
| H | 1.72575800  | 5.10205400  | -1.65006200 |
| C | 2.08594300  | -1.37649800 | -2.23019300 |
| C | 2.19403800  | -2.59637400 | -3.08575000 |
| H | 1.33717000  | -3.25447100 | -2.90851900 |
| H | 2.17253700  | -2.29241500 | -4.13511800 |
| N | 3.40228700  | -3.37126500 | -2.86227300 |
| C | 3.52806800  | -4.10620700 | -1.60715800 |
| H | 2.65157100  | -4.75699300 | -1.51336300 |
| H | 4.40045800  | -4.75830100 | -1.71137200 |
| S | 4.79699600  | -2.95764600 | -3.72445400 |
| O | 5.67661100  | -4.11933400 | -3.61426900 |
| O | 4.31404400  | -2.43103000 | -5.00005900 |
| C | 5.58927000  | -1.61032000 | -2.84989200 |
| C | 6.59813800  | -1.90281000 | -1.93013200 |
| C | 5.18959800  | -0.29792100 | -3.10689200 |
| C | 7.20568000  | -0.85341100 | -1.24148400 |
| H | 6.91648800  | -2.92932400 | -1.78856800 |
| C | 5.80013200  | 0.74172400  | -2.40652500 |
| H | 4.43490700  | -0.09882100 | -3.85784600 |
| H | 8.00849200  | -1.06533600 | -0.54285000 |
| H | 5.50270700  | 1.76635600  | -2.60143100 |
| C | 0.22743400  | -5.58581800 | -0.36603300 |
| H | 0.72592100  | -5.61073300 | 0.59434800  |
| C | 3.68939500  | -3.27321800 | -0.34783500 |
| H | 4.44945300  | -2.49457200 | -0.36255800 |
| C | 3.12138400  | -3.63272900 | 0.83213600  |
| H | 2.47035300  | -4.49758300 | 0.88168300  |
| H | 3.41742100  | -3.17509100 | 1.76843200  |
| C | 6.80202500  | 0.46437700  | -1.47267800 |
| H | 7.28570300  | 1.27900800  | -0.94244400 |
| C | 0.56094700  | -0.24261100 | 4.26493800  |
| H | -0.06779200 | 0.59557300  | 3.95403300  |
| H | 0.07486100  | -0.73629100 | 5.11256300  |
| H | 1.50748500  | 0.17597300  | 4.61116500  |
| C | -0.15467200 | -4.16447900 | 2.65215900  |
| H | -0.49097500 | -5.13593200 | 2.28707600  |
| H | 0.93695200  | -4.13783400 | 2.60600200  |
| H | -0.44058800 | -4.09648400 | 3.70726300  |

S\*\*2 before annihilation 2.0689, after 2.0012

S-TS1<sup>triplet</sup>

|   |             |             |            |
|---|-------------|-------------|------------|
| C | 0.36352700  | -2.30585800 | 2.86278800 |
| C | -0.31396700 | -3.36278900 | 1.95534600 |

|   |             |             |             |
|---|-------------|-------------|-------------|
| C | 1.89247100  | -2.09798500 | 2.75837600  |
| H | -1.33750500 | -3.47896100 | 2.33261800  |
| H | -0.13943900 | -1.33828800 | 2.76582000  |
| H | 0.16894500  | -2.63173700 | 3.89199300  |
| H | 2.37042700  | -3.06974900 | 2.59808300  |
| P | 2.33498200  | -1.09578900 | 1.24755700  |
| P | -0.50646600 | -2.82568200 | 0.17777800  |
| C | 4.14774800  | -1.12073000 | 1.07950700  |
| C | 4.72301900  | -0.27101100 | 0.11677200  |
| C | 4.95839200  | -2.05779400 | 1.73427100  |
| C | 6.08435600  | -0.34506200 | -0.16631800 |
| H | 4.09842400  | 0.44237000  | -0.41271500 |
| C | 6.32284700  | -2.13128100 | 1.44537100  |
| H | 4.53920900  | -2.73150400 | 2.47316200  |
| C | 6.88661000  | -1.27552200 | 0.50093600  |
| H | 6.52264400  | 0.30785000  | -0.91339300 |
| H | 6.94235600  | -2.85638800 | 1.96347700  |
| H | 7.94416800  | -1.33330600 | 0.27331900  |
| C | 1.88118900  | 0.61755000  | 1.67981000  |
| C | 2.79378800  | 1.50665900  | 2.26824700  |
| C | 0.56520900  | 1.04113300  | 1.43670500  |
| C | 2.39082300  | 2.79768500  | 2.60712700  |
| H | 3.81546700  | 1.19298700  | 2.45275800  |
| C | 0.16388600  | 2.32873700  | 1.78918100  |
| H | -0.13822500 | 0.38133100  | 0.94601100  |
| C | 1.07625600  | 3.20903000  | 2.37223900  |
| H | 3.10264800  | 3.48192200  | 3.05782300  |
| H | -0.85628600 | 2.64070800  | 1.59116100  |
| H | 0.76781700  | 4.21490600  | 2.63910200  |
| C | -1.69220600 | -1.43455200 | 0.20348600  |
| C | -1.76453900 | -0.65133100 | -0.95967300 |
| C | -2.45674700 | -1.07090200 | 1.32159100  |
| C | -2.56018200 | 0.49060400  | -0.99851300 |
| H | -1.17606500 | -0.92268300 | -1.82703100 |
| C | -3.25561700 | 0.07245600  | 1.28009200  |
| H | -2.43117700 | -1.66139800 | 2.23026000  |
| C | -3.30037800 | 0.85923300  | 0.12702600  |
| H | -2.58158600 | 1.09548300  | -1.89876800 |
| H | -3.84066500 | 0.34964300  | 2.15124100  |
| H | -3.91452400 | 1.75395300  | 0.10553700  |
| C | -1.34991000 | -4.19548300 | -0.67266600 |
| C | -0.80144900 | -4.68509800 | -1.86498900 |
| C | -1.42552700 | -5.72921600 | -2.54820400 |
| H | 0.10659100  | -4.23857100 | -2.25896300 |

|    |             |             |             |
|----|-------------|-------------|-------------|
| C  | -3.15546300 | -5.79686900 | -0.85535200 |
| C  | -2.59888900 | -6.28738500 | -2.04041600 |
| H  | -0.99763000 | -6.10422000 | -3.47235800 |
| H  | -4.07358000 | -6.22644700 | -0.46766700 |
| H  | -3.08478600 | -7.10094800 | -2.56928700 |
| Co | 1.46364200  | -2.04006600 | -0.68600700 |
| C  | 1.58950900  | -0.83271400 | -2.17060700 |
| C  | 0.97249100  | 0.41456700  | -2.57839800 |
| C  | 1.06598800  | 1.56597600  | -1.77845700 |
| C  | 0.22413100  | 0.46754100  | -3.76950800 |
| C  | 0.42877000  | 2.74233900  | -2.16226500 |
| H  | 1.63009300  | 1.53147300  | -0.85578900 |
| C  | -0.41759100 | 1.64624500  | -4.14279600 |
| H  | 0.14523400  | -0.42087900 | -4.38840900 |
| C  | -0.32013700 | 2.78670000  | -3.34041700 |
| H  | 0.51233000  | 3.62321900  | -1.53348500 |
| H  | -0.99091600 | 1.67584000  | -5.06400800 |
| H  | -0.82133000 | 3.70317200  | -3.63469100 |
| C  | 2.59231900  | -1.58232800 | -2.52673100 |
| C  | 3.76870700  | -1.31770900 | -3.43355800 |
| H  | 3.44108200  | -1.05855500 | -4.44252400 |
| H  | 4.32402700  | -0.46248300 | -3.01525700 |
| N  | 4.56194100  | -2.53326100 | -3.45406100 |
| C  | 4.46577400  | -3.23483200 | -2.18331800 |
| H  | 4.87518000  | -4.23933700 | -2.29500900 |
| H  | 4.97933800  | -2.71736200 | -1.36106500 |
| S  | 5.93136100  | -2.61817500 | -4.41412100 |
| O  | 6.40531300  | -3.99539900 | -4.29893000 |
| O  | 5.54499600  | -2.00073500 | -5.68066600 |
| C  | 7.14306500  | -1.55223400 | -3.64280200 |
| C  | 8.11455400  | -2.11321300 | -2.81345200 |
| C  | 7.09984300  | -0.17835400 | -3.89684900 |
| C  | 9.06245100  | -1.27565100 | -2.22538200 |
| H  | 8.13821000  | -3.18683400 | -2.66639400 |
| C  | 8.04220000  | 0.64987200  | -3.28796200 |
| H  | 6.36839600  | 0.22036800  | -4.59064800 |
| H  | 9.84219000  | -1.70036800 | -1.60087400 |
| H  | 8.02881200  | 1.71715400  | -3.48402100 |
| C  | -2.53741900 | -4.75147700 | -0.17371900 |
| H  | -2.98405400 | -4.36295400 | 0.73690800  |
| C  | 2.96485500  | -3.30219500 | -1.91841000 |
| C  | 2.53755300  | -3.73878700 | -0.59017500 |
| H  | 1.87786500  | -4.59912300 | -0.56221900 |
| H  | 3.29986300  | -3.72290100 | 0.18409400  |

|   |             |             |             |
|---|-------------|-------------|-------------|
| C | 9.02121100  | 0.10189300  | -2.45378700 |
| H | 9.76470500  | 0.74779000  | -1.99756900 |
| C | 2.42896000  | -1.47094900 | 4.05292800  |
| H | 1.90677600  | -0.53681500 | 4.27651600  |
| H | 2.27457900  | -2.15563300 | 4.89286600  |
| H | 3.49645800  | -1.24765200 | 3.99045000  |
| C | 0.35645700  | -4.73966900 | 2.04645900  |
| H | 1.36252700  | -4.73410400 | 1.62469100  |
| H | 0.43291300  | -5.04175700 | 3.09579200  |
| H | -0.22379000 | -5.49929700 | 1.51885000  |
| H | 2.45434200  | -3.83034700 | -2.72482600 |

S\*\*2 before annihilation      2.0646,      after      2.0011

*R-TS1*<sup>triplet</sup>

|   |             |             |             |
|---|-------------|-------------|-------------|
| C | 0.38887500  | -1.97414100 | 2.97884600  |
| C | -0.46935800 | -2.97072700 | 2.15612000  |
| C | 1.92971800  | -2.00220000 | 2.83395700  |
| H | -1.48195300 | -2.91778900 | 2.57446300  |
| H | 0.03554700  | -0.94877300 | 2.82779200  |
| H | 0.18016300  | -2.20105800 | 4.03144900  |
| H | 2.26267700  | -3.04097200 | 2.74019500  |
| P | 2.49074300  | -1.17200000 | 1.25924100  |
| P | -0.63471100 | -2.47565000 | 0.36691300  |
| C | 4.27707800  | -1.45563300 | 1.06874100  |
| C | 4.92703100  | -0.75967900 | 0.03368700  |
| C | 4.97995400  | -2.43597100 | 1.78219200  |
| C | 6.25952300  | -1.02954700 | -0.26602600 |
| H | 4.38470000  | -0.01236200 | -0.53827200 |
| C | 6.31476200  | -2.70683700 | 1.47331200  |
| H | 4.50014000  | -2.99167400 | 2.58023400  |
| C | 6.95576500  | -2.00607200 | 0.45248300  |
| H | 6.75356500  | -0.48324400 | -1.06306900 |
| H | 6.85149900  | -3.46525200 | 2.03408800  |
| H | 7.99256800  | -2.21955700 | 0.21423600  |
| C | 2.25940900  | 0.61029100  | 1.55208700  |
| C | 3.25853300  | 1.40957500  | 2.12852800  |
| C | 1.02223200  | 1.18146400  | 1.21795500  |
| C | 3.01425300  | 2.76071300  | 2.36935700  |
| H | 4.22242800  | 0.97938500  | 2.37878100  |
| C | 0.77862400  | 2.53027600  | 1.47269900  |
| H | 0.25983600  | 0.58358100  | 0.73511900  |
| C | 1.77473400  | 3.32072400  | 2.04720500  |
| H | 3.79099900  | 3.37706200  | 2.81056100  |
| H | -0.18279900 | 2.95695100  | 1.20666800  |

|    |             |             |             |
|----|-------------|-------------|-------------|
| H  | 1.59094100  | 4.37311200  | 2.23911600  |
| C  | -1.68414700 | -0.97695600 | 0.36062300  |
| C  | -1.77327300 | -0.28938900 | -0.86059600 |
| C  | -2.30491500 | -0.43663900 | 1.49530800  |
| C  | -2.44693200 | 0.92568200  | -0.94400800 |
| H  | -1.29429500 | -0.69621100 | -1.74262200 |
| C  | -2.98193800 | 0.78093300  | 1.40956200  |
| H  | -2.26280900 | -0.94676700 | 2.45068500  |
| C  | -3.04640500 | 1.46751100  | 0.19577800  |
| H  | -2.48385600 | 1.45138300  | -1.89213400 |
| H  | -3.45674000 | 1.19335400  | 2.29416600  |
| H  | -3.56558300 | 2.41892500  | 0.13800500  |
| C  | -1.59995400 | -3.76938800 | -0.47725200 |
| C  | -2.76053000 | -4.33397900 | 0.07095500  |
| C  | -3.46211800 | -5.30667800 | -0.63869400 |
| H  | -3.11933800 | -4.01273600 | 1.04435100  |
| C  | -1.87279600 | -5.14336700 | -2.45941600 |
| C  | -3.01842000 | -5.71165100 | -1.90119600 |
| H  | -4.35787800 | -5.74558700 | -0.21103800 |
| H  | -1.52933200 | -5.45038600 | -3.44146300 |
| H  | -3.57076100 | -6.46820600 | -2.44964100 |
| Co | 1.42497500  | -1.98817200 | -0.57448100 |
| C  | 1.55377100  | -0.95229200 | -2.17157700 |
| C  | 1.02133200  | 0.30760200  | -2.66506000 |
| C  | 1.35126300  | 1.51546400  | -2.03096500 |
| C  | 0.12949900  | 0.32915800  | -3.75342800 |
| C  | 0.80364000  | 2.71678100  | -2.47325000 |
| H  | 2.03239300  | 1.50208200  | -1.18936600 |
| C  | -0.42806200 | 1.53141200  | -4.18220700 |
| H  | -0.13639600 | -0.60058800 | -4.24720100 |
| C  | -0.09363600 | 2.72864800  | -3.54301000 |
| H  | 1.07107100  | 3.64288700  | -1.97435500 |
| H  | -1.11796900 | 1.53583000  | -5.02033400 |
| H  | -0.52637100 | 3.66452500  | -3.88168000 |
| C  | 2.04366100  | -2.05080700 | -2.68234800 |
| C  | 2.22078800  | -2.53407600 | -4.09764600 |
| H  | 1.21578700  | -2.68408900 | -4.52757100 |
| H  | 2.74472700  | -1.79535000 | -4.70829700 |
| N  | 2.97713500  | -3.77919600 | -4.03846000 |
| C  | 2.66799700  | -4.48760600 | -2.80316000 |
| H  | 1.65275200  | -4.91627400 | -2.79568500 |
| H  | 3.39109000  | -5.29091200 | -2.65704600 |
| S  | 3.09855100  | -4.68179100 | -5.46134000 |
| O  | 3.42277200  | -3.71369700 | -6.50546100 |

|   |             |             |             |
|---|-------------|-------------|-------------|
| O | 3.94372400  | -5.82459200 | -5.12747400 |
| C | 1.43879000  | -5.28217100 | -5.75109900 |
| C | 0.55262200  | -4.50514100 | -6.50221100 |
| C | 1.04753000  | -6.49790500 | -5.18470000 |
| C | -0.75601800 | -4.95503500 | -6.67799400 |
| H | 0.90189900  | -3.58988300 | -6.96671900 |
| C | -0.26198900 | -6.93930900 | -5.37419300 |
| H | 1.77033500  | -7.09529800 | -4.64073400 |
| C | -1.16179800 | -6.16753900 | -6.11494700 |
| H | -1.45213200 | -4.36985400 | -7.27003100 |
| H | -0.57479400 | -7.89090300 | -4.95660600 |
| C | -1.16441000 | -4.17687800 | -1.74582200 |
| H | -0.27417600 | -3.72499000 | -2.17192000 |
| C | 2.80309300  | -3.44704500 | -1.70258800 |
| H | 3.81710200  | -3.05222700 | -1.63833400 |
| C | 2.24610700  | -3.81103600 | -0.39850100 |
| H | 1.49777800  | -4.59984100 | -0.40845700 |
| H | 2.95291800  | -3.86385900 | 0.42267800  |
| C | 2.57910100  | -1.36870100 | 4.07401400  |
| H | 2.20163600  | -0.35514400 | 4.23282900  |
| H | 2.34356200  | -1.96231900 | 4.96279400  |
| H | 3.66625100  | -1.30881700 | 3.98650200  |
| C | 0.00799700  | -4.42164100 | 2.30221500  |
| H | 0.08159100  | -4.67787500 | 3.36404000  |
| H | -0.68990900 | -5.11931600 | 1.83543700  |
| H | 0.98891500  | -4.58142200 | 1.85119300  |
| H | -2.17716000 | -6.51974200 | -6.26759500 |

S\*\*2 before annihilation      2.1327,      after      2.0026

S-IM2<sup>triplet</sup>

|   |             |             |             |
|---|-------------|-------------|-------------|
| C | 0.23271700  | -2.26052100 | 2.93674800  |
| C | -0.37523300 | -3.28192300 | 1.94328300  |
| C | 1.75653900  | -2.00834300 | 2.91004100  |
| H | -1.38033900 | -3.51959500 | 2.31202800  |
| H | -0.29161900 | -1.30147600 | 2.86945400  |
| H | 0.00899100  | -2.64574200 | 3.93938000  |
| H | 2.27141200  | -2.96830500 | 2.79920600  |
| P | 2.26521300  | -1.02316500 | 1.40786900  |
| P | -0.62786300 | -2.62241800 | 0.21054000  |
| C | 4.08212300  | -1.12014400 | 1.27416200  |
| C | 4.67761200  | -0.41469600 | 0.21289700  |
| C | 4.86663700  | -2.00230700 | 2.02885400  |
| C | 6.02640300  | -0.58329500 | -0.08335600 |
| H | 4.07985500  | 0.25371400  | -0.39794900 |



|    |             |             |             |
|----|-------------|-------------|-------------|
| C  | 6.22117800  | -2.17011000 | 1.72962100  |
| H  | 4.43466800  | -2.56837600 | 2.84617900  |
| C  | 6.80045000  | -1.46644000 | 0.67466800  |
| H  | 6.47338100  | -0.03982800 | -0.90835500 |
| H  | 6.81927900  | -2.85487100 | 2.32233900  |
| H  | 7.84840200  | -1.60592700 | 0.43343400  |
| C  | 1.85969000  | 0.71008300  | 1.79865600  |
| C  | 2.79514500  | 1.57758900  | 2.38172200  |
| C  | 0.56466500  | 1.17175900  | 1.51965200  |
| C  | 2.43214400  | 2.88952500  | 2.68435500  |
| H  | 3.80180800  | 1.23070900  | 2.58886300  |
| C  | 0.20361700  | 2.48025700  | 1.83635600  |
| H  | -0.15203900 | 0.52126100  | 1.03532500  |
| C  | 1.13733200  | 3.34083800  | 2.41678600  |
| H  | 3.16001500  | 3.55917000  | 3.13121400  |
| H  | -0.80256200 | 2.82318500  | 1.61742100  |
| H  | 0.86017000  | 4.36258500  | 2.65616500  |
| C  | -1.81368800 | -1.24279400 | 0.36543800  |
| C  | -1.88302300 | -0.32797900 | -0.69804800 |
| C  | -2.62288900 | -1.04355700 | 1.49408000  |
| C  | -2.74016700 | 0.76856400  | -0.62836500 |
| H  | -1.26110600 | -0.46422900 | -1.57609600 |
| C  | -3.47127000 | 0.06161100  | 1.56407800  |
| H  | -2.59552200 | -1.73932000 | 2.32532200  |
| C  | -3.52869300 | 0.97060500  | 0.50621500  |
| H  | -2.78016600 | 1.46728400  | -1.45673500 |
| H  | -4.08866700 | 0.21018100  | 2.44420600  |
| H  | -4.18966900 | 1.82953000  | 0.56445400  |
| C  | -1.51946600 | -3.95046600 | -0.66014500 |
| C  | -0.85252100 | -4.64896100 | -1.67660700 |
| C  | -1.49412400 | -5.69172500 | -2.34536800 |
| H  | 0.16208000  | -4.36878100 | -1.94525000 |
| C  | -3.47441600 | -5.33680100 | -0.99759900 |
| C  | -2.80253700 | -6.03629400 | -2.00419800 |
| H  | -0.97635600 | -6.23006700 | -3.13284300 |
| H  | -4.49522300 | -5.60093000 | -0.74057400 |
| H  | -3.30299300 | -6.84548100 | -2.52633400 |
| Co | 1.52510900  | -2.05764300 | -0.63091500 |
| C  | 2.03780300  | -1.37438900 | -2.33881000 |
| C  | 1.29877600  | -0.15349900 | -2.60060900 |
| C  | 1.39720300  | 0.96241500  | -1.74195000 |
| C  | 0.36120200  | -0.11101100 | -3.65927900 |
| C  | 0.59565800  | 2.08375900  | -1.93791000 |
| H  | 2.10328300  | 0.94518900  | -0.92215500 |

|   |             |             |             |
|---|-------------|-------------|-------------|
| C | -0.41977200 | 1.02033100  | -3.86370900 |
| H | 0.26632500  | -0.97433200 | -4.30987400 |
| C | -0.30909900 | 2.11814900  | -3.00012500 |
| H | 0.68060400  | 2.92701200  | -1.26077600 |
| H | -1.12103000 | 1.04957200  | -4.69155200 |
| H | -0.92531000 | 2.99717000  | -3.16104200 |
| C | 2.95618400  | -2.08061700 | -3.01219500 |
| C | 3.85479400  | -1.70674500 | -4.16405500 |
| H | 3.37581700  | -1.74468700 | -5.14611400 |
| H | 4.25699200  | -0.69407500 | -4.02246500 |
| N | 4.89391000  | -2.75801800 | -4.06979600 |
| C | 4.87490700  | -3.42553700 | -2.75406100 |
| H | 5.30684200  | -4.42232700 | -2.84136400 |
| H | 5.42407100  | -2.85373300 | -1.98986900 |
| S | 6.34443700  | -2.53928600 | -4.87041600 |
| O | 7.04223700  | -3.82121300 | -4.79824000 |
| O | 5.99786000  | -1.87915100 | -6.12825700 |
| C | 7.27500200  | -1.37049500 | -3.87935900 |
| C | 8.19160000  | -1.85059800 | -2.94179700 |
| C | 7.07103900  | -0.00039900 | -4.06478600 |
| C | 8.91943400  | -0.93717500 | -2.17896700 |
| H | 8.35172900  | -2.91872300 | -2.85042200 |
| C | 7.79215900  | 0.90273800  | -3.28340400 |
| H | 6.39536800  | 0.34287400  | -4.84001300 |
| H | 9.65950500  | -1.29610400 | -1.47045100 |
| H | 7.65356500  | 1.96963700  | -3.42614700 |
| C | -2.83758500 | -4.29512000 | -0.32701200 |
| H | -3.36792900 | -3.74105300 | 0.44176800  |
| C | 3.36451500  | -3.40570300 | -2.45211600 |
| C | 2.88627700  | -3.48561600 | -1.00038100 |
| H | 2.41744700  | -4.43219200 | -0.71790100 |
| H | 3.67258900  | -3.21941900 | -0.28911200 |
| C | 8.71588500  | 0.43531200  | -2.34398600 |
| H | 9.29008600  | 1.14199900  | -1.75311800 |
| C | 2.20578300  | -1.33974900 | 4.21745600  |
| H | 1.65232800  | -0.41280600 | 4.38932800  |
| H | 2.01911400  | -2.00949700 | 5.06278400  |
| H | 3.27002900  | -1.09318700 | 4.20978900  |
| C | 0.41272100  | -4.59783100 | 1.87534600  |
| H | 1.39491100  | -4.46416800 | 1.41156600  |
| H | 0.56932700  | -4.99552600 | 2.88306800  |
| H | -0.12582100 | -5.35002400 | 1.29524800  |
| H | 2.89750900  | -4.19939200 | -3.05238300 |

| S**2 before annihilation        | 2.1128,     | after       | 2.0021      |
|---------------------------------|-------------|-------------|-------------|
| <i>R-IM2</i> <sup>triplet</sup> |             |             |             |
| C                               | 0.33883800  | -1.94387500 | 3.08591900  |
| C                               | -0.45895700 | -2.84501900 | 2.10602400  |
| C                               | 1.88130400  | -1.99168700 | 3.05395400  |
| H                               | -1.46951700 | -2.94593400 | 2.51881500  |
| H                               | 0.01767900  | -0.90074400 | 2.99766900  |
| H                               | 0.05037700  | -2.25581100 | 4.09718900  |
| H                               | 2.20103400  | -3.03839800 | 3.02132900  |
| P                               | 2.55769300  | -1.24014500 | 1.48871400  |
| P                               | -0.67843100 | -2.08574700 | 0.41321500  |
| C                               | 4.34184800  | -1.58316500 | 1.42530500  |
| C                               | 5.09557500  | -0.89974300 | 0.45498800  |
| C                               | 4.95040400  | -2.59420300 | 2.18118500  |
| C                               | 6.43839100  | -1.21264200 | 0.26064500  |
| H                               | 4.63088000  | -0.12104100 | -0.14283700 |
| C                               | 6.29689400  | -2.90484300 | 1.98056600  |
| H                               | 4.38819400  | -3.14194900 | 2.92950700  |
| C                               | 7.04155200  | -2.21669100 | 1.02307600  |
| H                               | 7.01422100  | -0.67469100 | -0.48558900 |
| H                               | 6.76174100  | -3.68409300 | 2.57586600  |
| H                               | 8.08746600  | -2.46116000 | 0.86934800  |
| C                               | 2.37427800  | 0.56497800  | 1.64540200  |
| C                               | 3.30805000  | 1.35421100  | 2.33566200  |
| C                               | 1.25362500  | 1.17349300  | 1.05983200  |
| C                               | 3.10673300  | 2.72852000  | 2.44852600  |
| H                               | 4.19031600  | 0.89706800  | 2.77092000  |
| C                               | 1.05280900  | 2.54760600  | 1.18172900  |
| H                               | 0.53468700  | 0.58349300  | 0.50618300  |
| C                               | 1.97879800  | 3.32547000  | 1.87730200  |
| H                               | 3.83074700  | 3.33567000  | 2.98237300  |
| H                               | 0.17595800  | 3.00015500  | 0.72983700  |
| H                               | 1.82885100  | 4.39635200  | 1.97055500  |
| C                               | -1.74045700 | -0.61884100 | 0.64875200  |
| C                               | -1.91988900 | 0.21895400  | -0.46358800 |
| C                               | -2.35885700 | -0.28865400 | 1.86287500  |
| C                               | -2.68897700 | 1.37495800  | -0.35676500 |
| H                               | -1.46002700 | -0.03232100 | -1.41071500 |
| C                               | -3.12673100 | 0.87229400  | 1.96514900  |
| H                               | -2.25334700 | -0.92464200 | 2.73413500  |
| C                               | -3.28807300 | 1.70854400  | 0.86010400  |
| H                               | -2.81566100 | 2.01154800  | -1.22614100 |
| H                               | -3.59949100 | 1.12062800  | 2.90999000  |
| H                               | -3.88314300 | 2.61212600  | 0.94556500  |

|    |             |             |             |
|----|-------------|-------------|-------------|
| C  | -1.71795000 | -3.26474200 | -0.51251600 |
| C  | -3.02709200 | -3.55847600 | -0.10262600 |
| C  | -3.79121000 | -4.47618700 | -0.81999400 |
| H  | -3.45158600 | -3.06023000 | 0.76406100  |
| C  | -1.96163400 | -4.80064900 | -2.37305900 |
| C  | -3.25812200 | -5.09873600 | -1.95270500 |
| H  | -4.80352400 | -4.70245600 | -0.50065400 |
| H  | -1.54783800 | -5.27058000 | -3.25876100 |
| H  | -3.85897300 | -5.81103100 | -2.50948300 |
| Co | 1.53623000  | -1.97756400 | -0.48719200 |
| C  | 1.64472800  | -1.56563300 | -2.34907000 |
| C  | 0.71013700  | -0.57223000 | -2.87035800 |
| C  | 0.87612200  | 0.78848200  | -2.54431200 |
| C  | -0.39343600 | -0.95130700 | -3.66237800 |
| C  | -0.02163700 | 1.74467800  | -3.01351900 |
| H  | 1.71771300  | 1.08425700  | -1.92590100 |
| C  | -1.28804300 | 0.00852900  | -4.12794500 |
| H  | -0.53737100 | -1.99837800 | -3.90804100 |
| C  | -1.10490800 | 1.35798900  | -3.80659900 |
| H  | 0.12446700  | 2.79068900  | -2.76325000 |
| H  | -2.13032800 | -0.29290000 | -4.74261000 |
| H  | -1.80239700 | 2.10283200  | -4.17638800 |
| C  | 2.54891200  | -2.31500500 | -3.00390700 |
| C  | 2.83402800  | -2.44605400 | -4.47571300 |
| H  | 1.90627000  | -2.41575600 | -5.05815500 |
| H  | 3.49441700  | -1.66348900 | -4.86258200 |
| N  | 3.51585300  | -3.76261600 | -4.54337700 |
| C  | 3.39892900  | -4.49523600 | -3.26335800 |
| H  | 2.47192000  | -5.08777500 | -3.21447200 |
| H  | 4.25241900  | -5.16035100 | -3.13697600 |
| S  | 3.34335300  | -4.64129000 | -5.96497700 |
| O  | 3.58010500  | -3.69411900 | -7.05207500 |
| O  | 4.11898100  | -5.86500200 | -5.77525800 |
| C  | 1.60787900  | -5.08629500 | -5.99807800 |
| C  | 0.69134100  | -4.21797900 | -6.59856100 |
| C  | 1.19242600  | -6.26378800 | -5.37130900 |
| C  | -0.66754100 | -4.52912300 | -6.55140100 |
| H  | 1.05056100  | -3.34076100 | -7.12462800 |
| C  | -0.16891900 | -6.56849900 | -5.33868100 |
| H  | 1.93134100  | -6.93944700 | -4.95582100 |
| C  | -1.09627400 | -5.70052000 | -5.92173800 |
| H  | -1.38804800 | -3.87116400 | -7.02666500 |
| H  | -0.50297600 | -7.49118800 | -4.87462500 |
| C  | -1.19294500 | -3.88480700 | -1.65440900 |

|   |             |             |             |
|---|-------------|-------------|-------------|
| H | -0.19125300 | -3.63617700 | -1.98840100 |
| C | 3.32651200  | -3.34264300 | -2.24092100 |
| H | 4.34221400  | -2.97015700 | -2.05391000 |
| C | 2.60560100  | -3.60506300 | -0.92521900 |
| H | 1.79739400  | -4.33654800 | -1.02792900 |
| H | 3.24979400  | -3.84845600 | -0.07813600 |
| C | 2.46097500  | -1.32639400 | 4.31037500  |
| H | 2.11648100  | -0.29260800 | 4.39731600  |
| H | 2.13518000  | -1.86917400 | 5.20317000  |
| H | 3.55326800  | -1.31765400 | 4.30079600  |
| C | 0.12452700  | -4.25786800 | 1.96692800  |
| H | 0.26977800  | -4.70565500 | 2.95510300  |
| H | -0.54658100 | -4.90436900 | 1.39800300  |
| H | 1.09148300  | -4.25471000 | 1.45452600  |
| H | -2.15335300 | -5.94774800 | -5.90432400 |

S\*\*2 before annihilation      0.0000,      after      0.0000

*S-TS2*<sup>CSS</sup>

|   |             |             |             |
|---|-------------|-------------|-------------|
| C | 0.93765500  | -2.94179600 | 2.48238300  |
| C | -0.06418900 | -3.90660200 | 1.81866400  |
| C | 2.19755900  | -2.56471800 | 1.67707500  |
| H | -0.82782000 | -4.14271000 | 2.56932400  |
| H | 0.43370900  | -2.02681700 | 2.81099600  |
| H | 1.28081000  | -3.43625700 | 3.39904700  |
| H | 2.51987300  | -3.43486000 | 1.09747800  |
| P | 1.81050600  | -1.24903300 | 0.40154800  |
| P | -0.97893300 | -3.13098200 | 0.39953100  |
| C | 3.42664900  | -0.86430400 | -0.36433500 |
| C | 3.72491500  | 0.44797200  | -0.75915600 |
| C | 4.36026700  | -1.88125700 | -0.62543900 |
| C | 4.93840500  | 0.73718500  | -1.38234200 |
| H | 3.01707900  | 1.24682200  | -0.57941100 |
| C | 5.56991700  | -1.59013900 | -1.25419800 |
| H | 4.15878600  | -2.90410800 | -0.32613700 |
| C | 5.86400500  | -0.27676600 | -1.62591000 |
| H | 5.15242700  | 1.75886400  | -1.67895100 |
| H | 6.28182400  | -2.38241700 | -1.45582100 |
| H | 6.80755800  | -0.05451200 | -2.11004200 |
| C | 1.40708800  | 0.22374300  | 1.41254300  |
| C | 2.40707700  | 0.97262000  | 2.05621300  |
| C | 0.06659900  | 0.58860700  | 1.59385100  |
| C | 2.06574700  | 2.06357800  | 2.85313300  |
| H | 3.45134100  | 0.71700900  | 1.92283200  |
| C | -0.27373200 | 1.67624000  | 2.39715800  |

|    |             |             |             |
|----|-------------|-------------|-------------|
| H  | -0.71950500 | 0.02996200  | 1.10679200  |
| C  | 0.72576500  | 2.41807200  | 3.02597800  |
| H  | 2.84819300  | 2.63742400  | 3.33933100  |
| H  | -1.31916600 | 1.93655500  | 2.52442400  |
| H  | 0.46502500  | 3.26918500  | 3.64702300  |
| C  | -2.15637200 | -1.93916000 | 1.13471100  |
| C  | -2.86917900 | -1.12360200 | 0.23606500  |
| C  | -2.33121900 | -1.75810200 | 2.51290300  |
| C  | -3.72477300 | -0.13365000 | 0.71597200  |
| H  | -2.74238700 | -1.27335500 | -0.83133000 |
| C  | -3.19095300 | -0.76643900 | 2.98684100  |
| H  | -1.79938700 | -2.37586100 | 3.22695700  |
| C  | -3.88165500 | 0.05189000  | 2.09192300  |
| H  | -4.27139200 | 0.49061000  | 0.01612000  |
| H  | -3.31863400 | -0.63339200 | 4.05639700  |
| H  | -4.54678000 | 0.82430400  | 2.46476400  |
| C  | -2.05742800 | -4.47085100 | -0.21756000 |
| C  | -2.96602000 | -5.06747400 | 0.67173600  |
| C  | -3.77629400 | -6.11674700 | 0.24594900  |
| H  | -3.05077300 | -4.70488800 | 1.69197200  |
| C  | -2.80354900 | -5.97383500 | -1.96265500 |
| C  | -3.69233100 | -6.57440300 | -1.07182500 |
| H  | -4.47625800 | -6.57352100 | 0.93825000  |
| H  | -2.74784600 | -6.31787300 | -2.99073300 |
| H  | -4.32579100 | -7.39106300 | -1.40302900 |
| Co | 0.21029500  | -1.91436200 | -1.09857700 |
| C  | 1.05970200  | -0.72638400 | -2.65021400 |
| C  | 1.15240800  | 0.73987900  | -2.55650300 |
| C  | 2.03082000  | 1.54167000  | -3.30885800 |
| C  | 0.33521600  | 1.38018400  | -1.60775900 |
| C  | 2.11790000  | 2.91330600  | -3.07756000 |
| H  | 2.66520900  | 1.10060400  | -4.06482800 |
| C  | 0.43294400  | 2.74543100  | -1.35940600 |
| H  | -0.37014100 | 0.78356600  | -1.03642300 |
| C  | 1.33432400  | 3.51937200  | -2.09312800 |
| H  | 2.80792200  | 3.51074800  | -3.66541300 |
| H  | -0.18579300 | 3.19925900  | -0.59208900 |
| H  | 1.41771100  | 4.58534100  | -1.90781700 |
| C  | 1.92742100  | -1.58423700 | -3.24602800 |
| C  | 3.14734700  | -1.33125100 | -4.09246000 |
| H  | 2.91684600  | -0.71302600 | -4.96447900 |
| H  | 3.93817100  | -0.83343400 | -3.51141200 |
| N  | 3.50421300  | -2.68048200 | -4.53703100 |
| C  | 3.05338900  | -3.68837900 | -3.58290200 |

|   |             |             |             |
|---|-------------|-------------|-------------|
| H | 2.93827600  | -4.65100600 | -4.08038700 |
| H | 3.75031300  | -3.79632700 | -2.73802800 |
| S | 4.76478400  | -2.95577500 | -5.58701200 |
| O | 4.57618400  | -4.31700100 | -6.08436300 |
| O | 4.81043600  | -1.78040100 | -6.45724400 |
| C | 6.25390500  | -2.95691000 | -4.59334300 |
| C | 6.58858700  | -4.10620000 | -3.87196100 |
| C | 7.05396900  | -1.81506100 | -4.56011100 |
| C | 7.74063700  | -4.09895900 | -3.08658600 |
| H | 5.97508300  | -4.99598900 | -3.95783200 |
| C | 8.21179500  | -1.82474400 | -3.78137200 |
| H | 6.77920800  | -0.95426400 | -5.15874300 |
| C | 8.54969700  | -2.95936700 | -3.04000000 |
| H | 8.01922700  | -4.98742000 | -2.52899800 |
| H | 8.85711800  | -0.95198000 | -3.76372900 |
| C | -1.98774000 | -4.92318900 | -1.54053900 |
| H | -1.32695100 | -4.43007400 | -2.23900000 |
| C | 1.71524800  | -3.07876500 | -3.11168300 |
| C | 1.28039400  | -3.43760600 | -1.70736300 |
| C | 3.32948400  | -2.16571000 | 2.63287900  |
| H | 3.01184300  | -1.36048800 | 3.30016900  |
| H | 3.60055600  | -3.02583400 | 3.25322100  |
| H | 4.22533200  | -1.83803600 | 2.10204100  |
| C | 0.57894900  | -5.23695100 | 1.39655800  |
| H | 1.14274300  | -5.65350600 | 2.23731600  |
| H | -0.17969200 | -5.96461200 | 1.10331000  |
| H | 1.26695200  | -5.12129300 | 0.55652500  |
| H | 0.94492200  | -3.36449100 | -3.84128100 |
| H | 2.13793500  | -3.56216900 | -1.04524200 |
| H | 0.66634300  | -4.33600000 | -1.66968400 |
| H | 9.45389300  | -2.96322600 | -2.43956700 |
| C | -0.96264400 | -3.19929900 | -6.42623600 |
| C | -0.52213700 | -2.25389200 | -7.35174000 |
| C | -0.20609900 | -0.95554600 | -6.93355200 |
| C | -0.31983700 | -0.60993800 | -5.59249700 |
| C | -0.73264500 | -1.56784900 | -4.65254300 |
| C | -1.06569900 | -2.86037100 | -5.07650700 |
| H | -1.22456900 | -4.20001400 | -6.75453400 |
| H | -0.43068700 | -2.52143000 | -8.39936700 |
| H | 0.12643600  | -0.21866100 | -7.65739800 |
| H | -0.06708800 | 0.39324300  | -5.26045800 |
| H | -1.42567200 | -3.57631200 | -4.34632200 |
| C | -0.80855800 | -1.20284300 | -3.21907100 |
| O | -1.20000300 | -2.10351800 | -2.34436700 |

|                            |             |             |             |
|----------------------------|-------------|-------------|-------------|
| H                          | -1.12977600 | -0.17057400 | -3.04472300 |
| S**2 before annihilation   | 0.0000,     | after       | -0.0000     |
| <b>R-TS2<sup>CSS</sup></b> |             |             |             |
| C                          | -0.25267100 | -2.48399600 | 2.90016700  |
| C                          | -0.30787600 | -3.32318000 | 1.60691200  |
| C                          | 1.13276200  | -1.98691100 | 3.35215600  |
| H                          | -1.32843600 | -3.71275900 | 1.51755900  |
| H                          | -0.93780500 | -1.63185200 | 2.83836500  |
| H                          | -0.64275200 | -3.12218700 | 3.70252000  |
| H                          | 1.86846500  | -2.77599200 | 3.16652300  |
| P                          | 1.69724700  | -0.55951400 | 2.30014500  |
| P                          | -0.08821800 | -2.29416900 | 0.06214400  |
| C                          | 3.38059300  | -0.16118800 | 2.87374700  |
| C                          | 3.88220500  | 1.13413600  | 2.66581200  |
| C                          | 4.22827500  | -1.14420700 | 3.40748500  |
| C                          | 5.20268200  | 1.43633000  | 2.99266500  |
| H                          | 3.24312300  | 1.89802700  | 2.24109300  |
| C                          | 5.54928600  | -0.83624400 | 3.73355800  |
| H                          | 3.86845400  | -2.15349800 | 3.57719300  |
| C                          | 6.03931100  | 0.45312900  | 3.52523600  |
| H                          | 5.57785200  | 2.44182200  | 2.83044000  |
| H                          | 6.19180200  | -1.60367700 | 4.15313800  |
| H                          | 7.06689200  | 0.69182100  | 3.78006500  |
| C                          | 0.67396600  | 0.86730600  | 2.78812700  |
| C                          | 0.88924400  | 1.55798700  | 3.99216800  |
| C                          | -0.36686800 | 1.27207700  | 1.94220700  |
| C                          | 0.06016500  | 2.62066000  | 4.34468400  |
| H                          | 1.70942200  | 1.27483200  | 4.64201100  |
| C                          | -1.19790300 | 2.33315000  | 2.29958500  |
| H                          | -0.53317400 | 0.76141200  | 1.00349400  |
| C                          | -0.98666500 | 3.00636900  | 3.50266200  |
| H                          | 0.23218800  | 3.15052200  | 5.27613000  |
| H                          | -2.00299100 | 2.62863900  | 1.63471300  |
| H                          | -1.62930000 | 3.83495200  | 3.78297100  |
| C                          | -1.62182500 | -1.29067000 | -0.02269100 |
| C                          | -1.65947300 | -0.25418800 | -0.97004200 |
| C                          | -2.72803000 | -1.47337700 | 0.82023700  |
| C                          | -2.76858400 | 0.58295400  | -1.06821500 |
| H                          | -0.82363300 | -0.10126600 | -1.63731700 |
| C                          | -3.83376200 | -0.62759400 | 0.72716500  |
| H                          | -2.74654500 | -2.26781800 | 1.55585000  |
| C                          | -3.85706200 | 0.40368000  | -0.21288900 |
| H                          | -2.77547500 | 1.37059500  | -1.81473600 |



|    |             |             |             |
|----|-------------|-------------|-------------|
| H  | -4.67930300 | -0.77864000 | 1.39055600  |
| H  | -4.72063800 | 1.05752600  | -0.28136300 |
| C  | -0.26230300 | -3.51046400 | -1.29031800 |
| C  | -1.47243800 | -3.67938700 | -1.97566600 |
| C  | -1.55667400 | -4.58202400 | -3.03715700 |
| H  | -2.34019500 | -3.09132400 | -1.70016100 |
| C  | 0.76738300  | -5.17209500 | -2.73244300 |
| C  | -0.43806300 | -5.32195000 | -3.42229300 |
| H  | -2.49696300 | -4.69920500 | -3.56663700 |
| H  | 1.63578900  | -5.75210400 | -3.01829200 |
| H  | -0.49921900 | -6.01612800 | -4.25413100 |
| Co | 1.65060200  | -0.82926900 | 0.03084500  |
| C  | 1.88842300  | -0.75267400 | -2.11495900 |
| C  | 0.89182700  | -0.43627500 | -3.16973500 |
| C  | 0.24838000  | -1.50260000 | -3.83195400 |
| C  | 0.47952700  | 0.86704100  | -3.51608700 |
| C  | -0.76035800 | -1.28363300 | -4.76501100 |
| H  | 0.52126900  | -2.51862500 | -3.58913700 |
| C  | -0.52949800 | 1.08728200  | -4.45353900 |
| H  | 0.93762800  | 1.73784300  | -3.06518500 |
| C  | -1.16225200 | 0.01425300  | -5.07991100 |
| H  | -1.23614900 | -2.13622700 | -5.23918800 |
| H  | -0.81445200 | 2.10618000  | -4.69717100 |
| H  | -1.95013900 | 0.18788100  | -5.80554400 |
| C  | 2.88126100  | -1.65483700 | -2.31226400 |
| C  | 3.30016500  | -2.35994400 | -3.57854600 |
| H  | 2.55662500  | -3.10669500 | -3.89257300 |
| H  | 3.45174000  | -1.66096000 | -4.40568800 |
| N  | 4.56842000  | -2.98603500 | -3.17912400 |
| C  | 4.52881300  | -3.30314900 | -1.74738200 |
| H  | 3.94395300  | -4.21370100 | -1.53751900 |
| H  | 5.53935800  | -3.43856500 | -1.36498500 |
| S  | 5.33339700  | -4.01285500 | -4.25660400 |
| O  | 5.35348500  | -3.30049800 | -5.53269000 |
| O  | 6.54006200  | -4.47416300 | -3.57307300 |
| C  | 4.23761500  | -5.41758000 | -4.44927800 |
| C  | 3.29129500  | -5.40753300 | -5.47674600 |
| C  | 4.34710800  | -6.49671700 | -3.56802800 |
| C  | 2.43977700  | -6.50317200 | -5.62267300 |
| H  | 3.25721300  | -4.57103700 | -6.16529600 |
| C  | 3.48884800  | -7.58546600 | -3.72369900 |
| H  | 5.11887100  | -6.49252100 | -2.80659100 |
| H  | 1.71282200  | -6.51602400 | -6.42844800 |
| H  | 3.57281900  | -8.43768900 | -3.05713300 |

|   |            |             |             |
|---|------------|-------------|-------------|
| C | 0.85268000 | -4.27024500 | -1.67550500 |
| H | 1.79585100 | -4.15248400 | -1.16029600 |
| C | 3.82235000 | -2.04443400 | -1.19962400 |
| H | 4.58977600 | -1.26009500 | -1.14778900 |
| C | 3.10733500 | -2.14442000 | 0.12961100  |
| H | 2.68325000 | -3.13016000 | 0.31148000  |
| H | 3.75076400 | -1.85877200 | 0.96002000  |
| C | 4.25775100 | 1.27441600  | -3.31413600 |
| C | 5.51182600 | 1.37354800  | -3.90368500 |
| C | 6.66561800 | 1.27832500  | -3.11594400 |
| C | 6.56146000 | 1.09147700  | -1.73759200 |
| C | 5.30584300 | 0.97599400  | -1.14123800 |
| C | 4.14923800 | 1.05970200  | -1.93061300 |
| H | 3.35944900 | 1.33039100  | -3.92244500 |
| H | 5.59767900 | 1.52105700  | -4.97517300 |
| H | 7.64323100 | 1.35320000  | -3.58103900 |
| H | 7.45730800 | 1.03039400  | -1.12799600 |
| H | 5.19976000 | 0.83798600  | -0.07028500 |
| O | 2.74778000 | 0.69241700  | -0.01524000 |
| C | 2.82333200 | 0.92358100  | -1.29699400 |
| H | 2.04256100 | 1.54925800  | -1.72689000 |
| C | 2.53833600 | -7.58882100 | -4.74909400 |
| H | 1.88222000 | -8.44456600 | -4.87323300 |
| C | 1.12473600 | -1.66194200 | 4.85175000  |
| H | 0.35514500 | -0.92224500 | 5.08690100  |
| H | 0.90589200 | -2.56965900 | 5.42297000  |
| H | 2.08704000 | -1.27309600 | 5.19132600  |
| C | 0.61571000 | -4.54826900 | 1.66174500  |
| H | 0.41191100 | -5.11077800 | 2.57862700  |
| H | 0.44277500 | -5.21500500 | 0.81579000  |
| H | 1.67528800 | -4.28321200 | 1.66870500  |

S\*\*2 before annihilation      2.0652,      after      2.0007

*S*-TS2<sup>triplet</sup>

|   |             |             |             |
|---|-------------|-------------|-------------|
| C | 0.96273800  | -2.95582900 | 2.38251200  |
| C | 0.03673100  | -3.92022200 | 1.61260000  |
| C | 2.20496500  | -2.41751300 | 1.65076100  |
| H | -0.71842100 | -4.27450100 | 2.32479000  |
| H | 0.39399300  | -2.11197900 | 2.78507500  |
| H | 1.32359400  | -3.51326300 | 3.25549100  |
| H | 2.60881400  | -3.20786700 | 1.01159000  |
| P | 1.78008100  | -1.02847100 | 0.45981200  |
| P | -0.94447500 | -3.08544200 | 0.27110800  |
| C | 3.41422900  | -0.62211900 | -0.25641300 |

|    |             |             |             |
|----|-------------|-------------|-------------|
| C  | 3.80693600  | 0.70311700  | -0.48143000 |
| C  | 4.26958600  | -1.66103400 | -0.66320100 |
| C  | 5.03778600  | 0.98217500  | -1.07606100 |
| H  | 3.15044900  | 1.52024300  | -0.21038000 |
| C  | 5.49516900  | -1.38034700 | -1.26174700 |
| H  | 3.99296600  | -2.69845700 | -0.51019400 |
| C  | 5.88426400  | -0.05394100 | -1.46491000 |
| H  | 5.32264500  | 2.01554000  | -1.24455100 |
| H  | 6.14537400  | -2.19136300 | -1.56860100 |
| H  | 6.83925300  | 0.16076000  | -1.93121100 |
| C  | 1.29785500  | 0.37937400  | 1.51631400  |
| C  | 2.22657400  | 1.10836400  | 2.27804600  |
| C  | -0.05992400 | 0.72166400  | 1.58456800  |
| C  | 1.79665800  | 2.15708900  | 3.08892700  |
| H  | 3.28245800  | 0.87138800  | 2.22543100  |
| C  | -0.48790700 | 1.76543000  | 2.40361100  |
| H  | -0.78621500 | 0.17579400  | 0.99711300  |
| C  | 0.44044500  | 2.48604000  | 3.15528700  |
| H  | 2.52178700  | 2.71842500  | 3.66951500  |
| H  | -1.54406400 | 2.00952100  | 2.44738300  |
| H  | 0.11170700  | 3.30387200  | 3.78871600  |
| C  | -2.11509400 | -1.98168500 | 1.15311900  |
| C  | -2.90526600 | -1.11091600 | 0.38144500  |
| C  | -2.25522300 | -1.97063800 | 2.54900400  |
| C  | -3.79293400 | -0.23328700 | 1.00140800  |
| H  | -2.80630500 | -1.11020200 | -0.69684100 |
| C  | -3.14528500 | -1.08927000 | 3.16297000  |
| H  | -1.68035800 | -2.64113500 | 3.17540000  |
| C  | -3.91041100 | -0.21368000 | 2.39294500  |
| H  | -4.39510500 | 0.43522300  | 0.39409000  |
| H  | -3.23924400 | -1.09040600 | 4.24419800  |
| H  | -4.60121500 | 0.47209100  | 2.87318900  |
| C  | -2.03086400 | -4.39924400 | -0.38450100 |
| C  | -2.98508300 | -4.98601600 | 0.46167800  |
| C  | -3.80888900 | -6.00379100 | -0.01351600 |
| H  | -3.09795700 | -4.63631400 | 1.48322000  |
| C  | -2.75980200 | -5.84657300 | -2.18569400 |
| C  | -3.69642800 | -6.43665800 | -1.33741100 |
| H  | -4.54451500 | -6.45328200 | 0.64575300  |
| H  | -2.67541900 | -6.17196400 | -3.21790200 |
| H  | -4.34322500 | -7.22624300 | -1.70617800 |
| Co | 0.26982300  | -1.89556400 | -1.26114500 |
| C  | 1.20612800  | -0.74131500 | -2.81863700 |
| C  | 1.44888200  | 0.70346600  | -2.61906300 |

|   |             |             |             |
|---|-------------|-------------|-------------|
| C | 2.43245300  | 1.45162300  | -3.29026300 |
| C | 0.64506300  | 1.38151700  | -1.68124000 |
| C | 2.61997900  | 2.80377100  | -3.00824200 |
| H | 3.07010200  | 0.99047400  | -4.02993400 |
| C | 0.84689800  | 2.72461900  | -1.37962800 |
| H | -0.14376100 | 0.83736300  | -1.17307700 |
| C | 1.84173100  | 3.44495300  | -2.04359800 |
| H | 3.38674500  | 3.35608500  | -3.54259700 |
| H | 0.22869500  | 3.20284400  | -0.62665600 |
| H | 2.00149600  | 4.49472500  | -1.81986200 |
| C | 2.00705900  | -1.63872000 | -3.45582300 |
| C | 3.26958300  | -1.42534800 | -4.25093600 |
| H | 3.13495000  | -0.71840600 | -5.07293600 |
| H | 4.08299900  | -1.05719800 | -3.60399300 |
| N | 3.52372300  | -2.76171700 | -4.79870100 |
| C | 3.01178500  | -3.78267700 | -3.88601200 |
| H | 2.85228800  | -4.71927700 | -4.41844800 |
| H | 3.69372900  | -3.95902900 | -3.03862800 |
| S | 4.88366200  | -3.03041700 | -5.73195100 |
| O | 4.76445000  | -4.40576900 | -6.21010100 |
| O | 4.97824000  | -1.87318500 | -6.62162700 |
| C | 6.27910200  | -2.96054400 | -4.61168200 |
| C | 6.60060800  | -4.08867100 | -3.85164000 |
| C | 7.02732700  | -1.78557700 | -4.52709600 |
| C | 7.68795900  | -4.02838500 | -2.98069200 |
| H | 6.03263100  | -5.00364700 | -3.97645000 |
| C | 8.12191000  | -1.74289200 | -3.66282900 |
| H | 6.76867200  | -0.94172800 | -5.15615300 |
| C | 8.44735400  | -2.85792700 | -2.88723000 |
| H | 7.95721200  | -4.90000600 | -2.39286100 |
| H | 8.72944300  | -0.84511500 | -3.60649100 |
| C | -1.92861600 | -4.83153800 | -1.71119500 |
| H | -1.21420200 | -4.36404400 | -2.37295100 |
| C | 1.70475900  | -3.11806800 | -3.39139400 |
| C | 1.26717800  | -3.49271700 | -1.99023100 |
| C | 3.28400900  | -2.02032200 | 2.66628600  |
| H | 2.89848200  | -1.28850800 | 3.38090100  |
| H | 3.59780100  | -2.90459300 | 3.23016600  |
| H | 4.16767900  | -1.59944200 | 2.18237700  |
| C | 0.76297900  | -5.16514000 | 1.08468500  |
| H | 1.28100900  | -5.66299600 | 1.91044800  |
| H | 0.05636700  | -5.87646100 | 0.65156400  |
| H | 1.50394600  | -4.92634800 | 0.32019900  |
| H | 0.91098800  | -3.33741200 | -4.12007500 |

|   |             |             |             |
|---|-------------|-------------|-------------|
| H | 2.11889000  | -3.46855800 | -1.30311800 |
| H | 0.77418900  | -4.45935300 | -1.91622700 |
| H | 9.30300400  | -2.82167200 | -2.22045200 |
| C | -1.76337400 | -3.42596900 | -5.85825600 |
| C | -1.09929900 | -2.94324500 | -6.98511200 |
| C | -0.33643900 | -1.77154600 | -6.90102700 |
| C | -0.22976700 | -1.09845700 | -5.69053200 |
| C | -0.86486200 | -1.60190200 | -4.54515500 |
| C | -1.64615800 | -2.75834800 | -4.63745800 |
| H | -2.37590700 | -4.31945900 | -5.92870200 |
| H | -1.18037700 | -3.46815700 | -7.93145700 |
| H | 0.17191400  | -1.39014500 | -7.78039900 |
| H | 0.36601900  | -0.19238400 | -5.61976600 |
| H | -2.17312500 | -3.10555900 | -3.75808800 |
| C | -0.72890300 | -0.88863500 | -3.24909700 |
| O | -1.31959400 | -1.39326700 | -2.18055800 |
| H | -0.77217000 | 0.20005800  | -3.34272500 |

S\*\*2 before annihilation      2.0708,      after      2.0009

*R-TS2*<sup>triplet</sup>

|   |             |             |             |
|---|-------------|-------------|-------------|
| C | 0.07412000  | -2.44583400 | 2.81881500  |
| C | -0.21198200 | -3.21566300 | 1.51357900  |
| C | 1.51852800  | -1.96846200 | 3.07820200  |
| H | -1.24702600 | -3.57180200 | 1.57129800  |
| H | -0.59870000 | -1.58931800 | 2.92411000  |
| H | -0.18377500 | -3.13008300 | 3.63626700  |
| H | 2.22443100  | -2.72523900 | 2.71956800  |
| P | 1.90193300  | -0.45723500 | 2.05395700  |
| P | -0.20068900 | -2.11539700 | -0.00970900 |
| C | 3.48036900  | 0.19953900  | 2.67393600  |
| C | 3.68626000  | 1.58707700  | 2.71862900  |
| C | 4.54205400  | -0.66404400 | 2.99050500  |
| C | 4.93286400  | 2.09826500  | 3.07821800  |
| H | 2.87989500  | 2.26247100  | 2.45885900  |
| C | 5.78626800  | -0.14720700 | 3.34692700  |
| H | 4.40220200  | -1.73994900 | 2.96582700  |
| C | 5.98423400  | 1.23488800  | 3.38958200  |
| H | 5.08289300  | 3.17254800  | 3.10808600  |
| H | 6.59854200  | -0.82279200 | 3.59512500  |
| H | 6.95323700  | 1.63614600  | 3.66857100  |
| C | 0.65165100  | 0.79579600  | 2.49318900  |
| C | 0.55448700  | 1.30943800  | 3.79886800  |
| C | -0.25205900 | 1.23590100  | 1.51700600  |
| C | -0.45476200 | 2.21370400  | 4.12124600  |

|    |             |             |             |
|----|-------------|-------------|-------------|
| H  | 1.27838000  | 1.02453100  | 4.55329000  |
| C  | -1.26475200 | 2.13635500  | 1.84472100  |
| H  | -0.15641800 | 0.88993500  | 0.49800300  |
| C  | -1.37226100 | 2.61950700  | 3.14788400  |
| H  | -0.52205500 | 2.60650600  | 5.13075700  |
| H  | -1.96538500 | 2.45164600  | 1.07914400  |
| H  | -2.15929700 | 3.32122000  | 3.40550800  |
| C  | -1.80345100 | -1.23540600 | 0.05856000  |
| C  | -2.12327600 | -0.41270800 | -1.03261700 |
| C  | -2.68448900 | -1.29086700 | 1.14668100  |
| C  | -3.28766200 | 0.34960500  | -1.03011900 |
| H  | -1.46475100 | -0.37362200 | -1.88828400 |
| C  | -3.84824200 | -0.52049700 | 1.14968800  |
| H  | -2.48148200 | -1.92396400 | 2.00074000  |
| C  | -4.15090500 | 0.30513300  | 0.06734500  |
| H  | -3.51650400 | 0.97480100  | -1.88740500 |
| H  | -4.51887600 | -0.56988600 | 2.00149500  |
| H  | -5.05662600 | 0.90307800  | 0.07535600  |
| C  | -0.37823500 | -3.29541900 | -1.39988500 |
| C  | -1.58912200 | -3.49757300 | -2.07412600 |
| C  | -1.66042000 | -4.40573800 | -3.13192000 |
| H  | -2.47211900 | -2.94006100 | -1.78587000 |
| C  | 0.67379600  | -4.95093900 | -2.83520500 |
| C  | -0.53306700 | -5.13287300 | -3.51433900 |
| H  | -2.60269100 | -4.54688600 | -3.65191900 |
| H  | 1.54789800  | -5.52580000 | -3.11362800 |
| H  | -0.58836900 | -5.84331300 | -4.33259600 |
| Co | 1.89182700  | -0.79078700 | -0.21036700 |
| C  | 2.11505100  | -0.74953100 | -2.29885700 |
| C  | 0.93309800  | -0.42311300 | -3.13389600 |
| C  | 0.37455500  | -1.37447200 | -4.01191700 |
| C  | 0.27393100  | 0.82319400  | -3.03801000 |
| C  | -0.73945500 | -1.07825000 | -4.79261500 |
| H  | 0.78714500  | -2.37071700 | -4.06702100 |
| C  | -0.82600600 | 1.12645800  | -3.83760000 |
| H  | 0.58543300  | 1.55342600  | -2.30166800 |
| C  | -1.33664200 | 0.18079900  | -4.72708800 |
| H  | -1.14108800 | -1.84084600 | -5.45203900 |
| H  | -1.29557200 | 2.10095300  | -3.74635600 |
| H  | -2.19528200 | 0.41563600  | -5.34767700 |
| C  | 3.04822300  | -1.71384600 | -2.55623800 |
| C  | 3.28516900  | -2.54914600 | -3.79153900 |
| H  | 2.49218700  | -3.29813700 | -3.93180000 |
| H  | 3.34701800  | -1.94754300 | -4.70236200 |

|   |            |             |             |
|---|------------|-------------|-------------|
| N | 4.57267900 | -3.18914500 | -3.48338000 |
| C | 4.63980700 | -3.42438900 | -2.03738200 |
| H | 4.00845500 | -4.27266500 | -1.72401600 |
| H | 5.66769600 | -3.61216000 | -1.73182500 |
| S | 5.18869200 | -4.31941700 | -4.55953700 |
| O | 5.10787400 | -3.69059800 | -5.87642200 |
| O | 6.43862400 | -4.78444500 | -3.96322800 |
| C | 4.02748200 | -5.68298600 | -4.54507800 |
| C | 3.03936300 | -5.74722600 | -5.52984500 |
| C | 4.12629500 | -6.65372800 | -3.54401400 |
| C | 2.13285600 | -6.80806900 | -5.50921400 |
| H | 3.01440400 | -4.99510200 | -6.30992900 |
| C | 3.20744200 | -7.70273300 | -3.52840000 |
| H | 4.93220000 | -6.60255600 | -2.82055900 |
| H | 1.37387300 | -6.88231800 | -6.28151500 |
| H | 3.27759900 | -8.46969100 | -2.76393700 |
| C | 0.75139400 | -4.02815900 | -1.79587200 |
| H | 1.69729300 | -3.88069300 | -1.29093000 |
| C | 4.07045700 | -2.08750400 | -1.51268900 |
| H | 4.88861500 | -1.36095500 | -1.57940900 |
| C | 3.46487400 | -2.05847300 | -0.11670400 |
| H | 2.96409700 | -2.99981400 | 0.13039800  |
| H | 4.19069900 | -1.81196400 | 0.65672800  |
| C | 4.98276400 | 0.97946800  | -2.85891500 |
| C | 6.37136100 | 0.96469000  | -2.92523900 |
| C | 7.12581100 | 0.92131900  | -1.74656900 |
| C | 6.48506800 | 0.89741100  | -0.50732200 |
| C | 5.09204800 | 0.89593900  | -0.44066000 |
| C | 4.33446700 | 0.92921900  | -1.61560500 |
| H | 4.39308100 | 1.00579400  | -3.77188800 |
| H | 6.86896600 | 0.98766800  | -3.88910200 |
| H | 8.20981700 | 0.91060800  | -1.79979600 |
| H | 7.06398200 | 0.87600500  | 0.41022100  |
| H | 4.58460300 | 0.86973300  | 0.51124600  |
| O | 2.21919000 | 1.09086400  | -0.42173800 |
| C | 2.85047700 | 0.92317500  | -1.57744900 |
| H | 2.43578900 | 1.46104600  | -2.43315700 |
| C | 2.21374400 | -7.77977400 | -4.50895800 |
| H | 1.51016700 | -8.60614800 | -4.49957900 |
| C | 1.72828600 | -1.77464200 | 4.58782800  |
| H | 0.94779400 | -1.13695200 | 5.00957800  |
| H | 1.66701500 | -2.74615100 | 5.08825600  |
| H | 2.69836400 | -1.33379000 | 4.82297100  |
| C | 0.67452200 | -4.46055800 | 1.38399800  |

|                                 |             |             |             |
|---------------------------------|-------------|-------------|-------------|
| H                               | 0.62775300  | -5.02911200 | 2.31851700  |
| H                               | 0.33848800  | -5.11162700 | 0.57708800  |
| H                               | 1.72410100  | -4.21709500 | 1.20250100  |
| S**2 before annihilation        | 2.2921,     | after       | 2.0047      |
| <b>S-IM3</b> <sup>triplet</sup> |             |             |             |
| C                               | 0.98234700  | -2.89513900 | 2.57793100  |
| C                               | 0.16908900  | -4.00416100 | 1.86021800  |
| C                               | 2.28523200  | -2.38765500 | 1.91873600  |
| H                               | -0.50692400 | -4.42951500 | 2.61130300  |
| H                               | 0.33889000  | -2.04160300 | 2.81739900  |
| H                               | 1.28036300  | -3.31760100 | 3.54467700  |
| H                               | 2.79116800  | -3.23317300 | 1.44226000  |
| P                               | 1.98044000  | -1.16996000 | 0.52493300  |
| P                               | -0.88640900 | -3.31637400 | 0.49772900  |
| C                               | 3.62781300  | -0.75476600 | -0.12866600 |
| C                               | 3.86198200  | 0.50947000  | -0.69190300 |
| C                               | 4.63221100  | -1.73468200 | -0.19756400 |
| C                               | 5.08744900  | 0.79000300  | -1.29473400 |
| H                               | 3.09242600  | 1.27043200  | -0.67153100 |
| C                               | 5.85372300  | -1.44923800 | -0.80520400 |
| H                               | 4.47071000  | -2.72380200 | 0.21864600  |
| C                               | 6.08396200  | -0.18477000 | -1.35061300 |
| H                               | 5.25031200  | 1.76979200  | -1.73126600 |
| H                               | 6.61743900  | -2.21595800 | -0.87023900 |
| H                               | 7.03257100  | 0.03090800  | -1.82908200 |
| C                               | 1.32291600  | 0.33451200  | 1.31248500  |
| C                               | 2.14629500  | 1.27110400  | 1.95656000  |
| C                               | -0.06316200 | 0.54636500  | 1.27510000  |
| C                               | 1.58399100  | 2.40076500  | 2.54826400  |
| H                               | 3.22062800  | 1.12841400  | 1.97916300  |
| C                               | -0.62314300 | 1.67205500  | 1.87663900  |
| H                               | -0.71204000 | -0.15998100 | 0.77209800  |
| C                               | 0.20134900  | 2.60243400  | 2.51105200  |
| H                               | 2.22573700  | 3.12498000  | 3.03971900  |
| H                               | -1.69821100 | 1.81503600  | 1.84340700  |
| H                               | -0.22949200 | 3.48407300  | 2.97483300  |
| C                               | -2.16908400 | -2.28303000 | 1.28702000  |
| C                               | -2.89359300 | -1.42131100 | 0.44464800  |
| C                               | -2.43571500 | -2.29052300 | 2.66237200  |
| C                               | -3.86993200 | -0.58210800 | 0.97823400  |
| H                               | -2.66788000 | -1.39302800 | -0.61787500 |
| C                               | -3.40836200 | -1.44103300 | 3.19080400  |
| H                               | -1.89479000 | -2.95162000 | 3.33050400  |



|    |             |             |             |
|----|-------------|-------------|-------------|
| C  | -4.12484100 | -0.58631500 | 2.35217800  |
| H  | -4.42785600 | 0.07853200  | 0.32199900  |
| H  | -3.60762200 | -1.45061600 | 4.25767500  |
| H  | -4.88112800 | 0.07216300  | 2.76740000  |
| C  | -1.77183600 | -4.70760300 | -0.27478400 |
| C  | -2.31449600 | -5.76486600 | 0.46996900  |
| C  | -3.00344900 | -6.78865300 | -0.17713700 |
| H  | -2.20765900 | -5.78844800 | 1.55053300  |
| C  | -2.64306700 | -5.69852100 | -2.30821400 |
| C  | -3.16624300 | -6.75731400 | -1.56541100 |
| H  | -3.41894600 | -7.60837800 | 0.40022400  |
| H  | -2.77573700 | -5.66313400 | -3.38507600 |
| H  | -3.70565400 | -7.55647100 | -2.06370500 |
| Co | 0.39758500  | -2.01795600 | -1.02864100 |
| C  | 1.00901800  | -0.33932100 | -3.31610500 |
| C  | 1.39528600  | 1.07842700  | -3.09490000 |
| C  | 2.29238000  | 1.77307400  | -3.91730100 |
| C  | 0.85505200  | 1.73837500  | -1.97813600 |
| C  | 2.67846500  | 3.07552600  | -3.59808100 |
| H  | 2.67597500  | 1.30454600  | -4.81769900 |
| C  | 1.24726200  | 3.03497100  | -1.65325200 |
| H  | 0.14866200  | 1.21715300  | -1.34161200 |
| C  | 2.17107800  | 3.70490800  | -2.45919900 |
| H  | 3.37044000  | 3.60257000  | -4.24750200 |
| H  | 0.83636700  | 3.51386000  | -0.76972700 |
| H  | 2.47866800  | 4.71631100  | -2.21331900 |
| C  | 1.90695000  | -1.33371800 | -3.43564400 |
| C  | 3.40361000  | -1.24239800 | -3.61744800 |
| H  | 3.76436600  | -0.29447900 | -3.99975400 |
| H  | 3.94178800  | -1.47600400 | -2.68977400 |
| N  | 3.57645000  | -2.29961800 | -4.61914400 |
| C  | 2.77812700  | -3.46709600 | -4.24716400 |
| H  | 2.47681300  | -4.01752100 | -5.13798600 |
| H  | 3.32892900  | -4.14862900 | -3.58111200 |
| S  | 4.97416600  | -2.43521500 | -5.51493900 |
| O  | 4.73481700  | -3.54657200 | -6.43363200 |
| O  | 5.29279700  | -1.07913800 | -5.96254400 |
| C  | 6.26854000  | -2.92968700 | -4.37843200 |
| C  | 6.28445400  | -4.23483700 | -3.87788400 |
| C  | 7.25555100  | -2.00645600 | -4.03336400 |
| C  | 7.29608500  | -4.60734500 | -2.99400300 |
| H  | 5.54421200  | -4.95465300 | -4.20892300 |
| C  | 8.27756900  | -2.39867700 | -3.16831500 |
| H  | 7.22497600  | -1.01231300 | -4.46363500 |

|   |             |             |             |
|---|-------------|-------------|-------------|
| C | 8.29277600  | -3.69216600 | -2.64198800 |
| H | 7.32455100  | -5.61948900 | -2.60326700 |
| H | 9.06665800  | -1.69812900 | -2.91319300 |
| C | -1.94354900 | -4.67594700 | -1.66685500 |
| H | -1.54973700 | -3.84290300 | -2.23922200 |
| C | 1.56391900  | -2.82670100 | -3.49888700 |
| C | 1.41684000  | -3.38348400 | -2.09994000 |
| C | 3.21759000  | -1.79698400 | 2.98749900  |
| H | 2.72371100  | -0.98671700 | 3.53060000  |
| H | 3.48550100  | -2.57288200 | 3.71125600  |
| H | 4.14184200  | -1.40674200 | 2.55590700  |
| C | 1.04500200  | -5.14631800 | 1.32504500  |
| H | 1.72037300  | -5.50260200 | 2.10941200  |
| H | 0.43507800  | -5.98860400 | 0.99409500  |
| H | 1.65541400  | -4.83185800 | 0.47318500  |
| H | 0.64131500  | -2.99112400 | -4.05416900 |
| H | 2.34998200  | -3.43838500 | -1.53165200 |
| H | 0.81234800  | -4.28606600 | -2.00614600 |
| H | 9.09228900  | -3.99509700 | -1.97312300 |
| C | -2.65152400 | -2.79270400 | -5.58874000 |
| C | -2.03860600 | -2.60467900 | -6.82853300 |
| C | -0.92843100 | -1.76475300 | -6.92768700 |
| C | -0.42563900 | -1.12676400 | -5.79330900 |
| C | -1.02324200 | -1.32789900 | -4.54419700 |
| C | -2.14922100 | -2.15487500 | -4.45416500 |
| H | -3.52587700 | -3.43165800 | -5.50461600 |
| H | -2.42564200 | -3.10338400 | -7.71142900 |
| H | -0.44743900 | -1.60837600 | -7.88813200 |
| H | 0.44767100  | -0.48882700 | -5.88065300 |
| H | -2.62568800 | -2.29574500 | -3.49097200 |
| C | -0.50244100 | -0.63692000 | -3.28612800 |
| O | -0.85588000 | -1.37109100 | -2.12942800 |
| H | -1.01038400 | 0.33468800  | -3.21234700 |

S\*\*2 before annihilation 2.2272, after 2.0034

**R-IM3**<sup>triplet</sup>

|   |             |             |            |
|---|-------------|-------------|------------|
| C | -0.14105600 | -2.56409800 | 2.96094300 |
| C | -0.19276000 | -3.44996000 | 1.69186700 |
| C | 1.23848400  | -2.05873300 | 3.44185200 |
| H | -1.20164100 | -3.87687800 | 1.64428800 |
| H | -0.83090600 | -1.71824600 | 2.87186300 |
| H | -0.54495800 | -3.18790500 | 3.76749900 |
| H | 1.99490300  | -2.81491500 | 3.20695600 |
| P | 1.75283600  | -0.55597800 | 2.46101100 |

|    |             |             |             |
|----|-------------|-------------|-------------|
| P  | -0.00324600 | -2.50802700 | 0.08650600  |
| C  | 3.43616200  | -0.11726000 | 3.00339600  |
| C  | 3.85967300  | 1.21737100  | 2.89530700  |
| C  | 4.36827100  | -1.10398100 | 3.35923800  |
| C  | 5.18784800  | 1.55606700  | 3.14957500  |
| H  | 3.15161000  | 1.98877800  | 2.61154000  |
| C  | 5.69592600  | -0.75950300 | 3.61391700  |
| H  | 4.06697200  | -2.14329600 | 3.44382800  |
| C  | 6.10877400  | 0.56965800  | 3.50802800  |
| H  | 5.50178900  | 2.59172000  | 3.06659300  |
| H  | 6.40601600  | -1.52970000 | 3.89768700  |
| H  | 7.14213800  | 0.83514600  | 3.70599700  |
| C  | 0.66999200  | 0.80132600  | 3.00791400  |
| C  | 0.83017700  | 1.42286100  | 4.25800300  |
| C  | -0.36851400 | 1.21252700  | 2.16084900  |
| C  | -0.05030800 | 2.42638900  | 4.65520900  |
| H  | 1.64889700  | 1.13422800  | 4.90792600  |
| C  | -1.25171000 | 2.21290900  | 2.56636600  |
| H  | -0.48120900 | 0.76164700  | 1.18394100  |
| C  | -1.09524500 | 2.81788700  | 3.81320000  |
| H  | 0.07942600  | 2.90546900  | 5.62039400  |
| H  | -2.05231500 | 2.52024200  | 1.90161200  |
| H  | -1.77835200 | 3.60062700  | 4.12756500  |
| C  | -1.43942700 | -1.38946200 | -0.02626900 |
| C  | -1.35826300 | -0.33482500 | -0.95220000 |
| C  | -2.58488700 | -1.51314200 | 0.77368900  |
| C  | -2.40260700 | 0.57935400  | -1.07367600 |
| H  | -0.48117500 | -0.22359800 | -1.57807600 |
| C  | -3.62118800 | -0.58696500 | 0.65920600  |
| H  | -2.68048700 | -2.32438500 | 1.48629700  |
| C  | -3.53174900 | 0.45984800  | -0.26108300 |
| H  | -2.32730100 | 1.38309600  | -1.79865000 |
| H  | -4.50093500 | -0.68619200 | 1.28678500  |
| H  | -4.34262200 | 1.17614100  | -0.34697500 |
| C  | -0.22000800 | -3.73391600 | -1.24283400 |
| C  | -1.40309000 | -3.81569900 | -1.99060100 |
| C  | -1.51077500 | -4.75026700 | -3.02162500 |
| H  | -2.22890900 | -3.14673600 | -1.77589900 |
| C  | 0.72823000  | -5.54041700 | -2.55714400 |
| C  | -0.45057300 | -5.61349300 | -3.30209500 |
| H  | -2.42641500 | -4.80522200 | -3.60189700 |
| H  | 1.55452200  | -6.20478900 | -2.77618600 |
| H  | -0.53297200 | -6.33922200 | -4.10383600 |
| Co | 1.76295600  | -0.95523300 | 0.08535800  |

|   |             |             |             |
|---|-------------|-------------|-------------|
| C | 2.15865000  | -0.27106800 | -2.78346600 |
| C | 1.08190500  | -0.03682900 | -3.77422400 |
| C | 0.09763300  | -1.01511700 | -4.00363200 |
| C | 0.99763100  | 1.17092500  | -4.48851800 |
| C | -0.93223300 | -0.79640500 | -4.91496800 |
| H | 0.12202900  | -1.93969700 | -3.43853500 |
| C | -0.02767000 | 1.38524700  | -5.40785000 |
| H | 1.75131900  | 1.93913200  | -4.34522800 |
| C | -0.99854500 | 0.40487500  | -5.62234000 |
| H | -1.68588700 | -1.56342600 | -5.06565000 |
| H | -0.06622100 | 2.31872300  | -5.96028100 |
| H | -1.79929000 | 0.57725500  | -6.33434400 |
| C | 2.79778400  | -1.45519900 | -2.70915600 |
| C | 2.72114300  | -2.55697500 | -3.75214100 |
| H | 1.92717900  | -3.28684900 | -3.54542400 |
| H | 2.58339500  | -2.16492500 | -4.76002300 |
| N | 4.04695900  | -3.15993400 | -3.60778800 |
| C | 4.40381600  | -3.20430300 | -2.19989800 |
| H | 3.88030600  | -4.01591300 | -1.66693200 |
| H | 5.47792100  | -3.34238800 | -2.08273500 |
| S | 4.68913400  | -4.19144200 | -4.74384800 |
| O | 4.35921900  | -3.60858900 | -6.04272100 |
| O | 6.05869900  | -4.45054400 | -4.30229700 |
| C | 3.78265300  | -5.73198400 | -4.61534000 |
| C | 2.71488600  | -5.96793300 | -5.48258600 |
| C | 4.17689300  | -6.67876600 | -3.66635000 |
| C | 2.03075800  | -7.18098100 | -5.39733100 |
| H | 2.45738500  | -5.22432100 | -6.22790400 |
| C | 3.47852000  | -7.88345400 | -3.58393200 |
| H | 5.03905200  | -6.48495700 | -3.03797500 |
| H | 1.21456500  | -7.38781800 | -6.08237700 |
| H | 3.78126500  | -8.63425900 | -2.86113900 |
| C | 0.84753300  | -4.59410300 | -1.54304400 |
| H | 1.77751400  | -4.51978500 | -0.98951100 |
| C | 3.91164900  | -1.81864900 | -1.70653500 |
| H | 4.71734200  | -1.09354000 | -1.85294100 |
| C | 3.52702200  | -1.80338000 | -0.24214000 |
| H | 3.32478800  | -2.78734900 | 0.19637700  |
| H | 4.16720600  | -1.19537300 | 0.39636100  |
| C | 4.68213000  | 1.35831900  | -3.09317200 |
| C | 6.04376300  | 1.65563700  | -3.11505700 |
| C | 6.73871900  | 1.85428100  | -1.91896600 |
| C | 6.05976800  | 1.76331100  | -0.70375000 |
| C | 4.69548200  | 1.46991300  | -0.68183400 |

|   |            |             |             |
|---|------------|-------------|-------------|
| C | 4.00037500 | 1.25442900  | -1.87439300 |
| H | 4.15622200 | 1.17744400  | -4.02648400 |
| H | 6.56463900 | 1.72296000  | -4.06497800 |
| H | 7.80066600 | 2.07785800  | -1.93795800 |
| H | 6.58910600 | 1.91416000  | 0.23258500  |
| H | 4.16466900 | 1.39348600  | 0.25810200  |
| O | 2.06652100 | 0.67649300  | -0.53694900 |
| C | 2.51821400 | 0.90310800  | -1.85075400 |
| H | 1.95965900 | 1.77651200  | -2.21440500 |
| C | 2.40868000 | -8.13445000 | -4.44891500 |
| H | 1.87929300 | -9.08028500 | -4.39172600 |
| C | 1.23784500 | -1.82330400 | 4.95707100  |
| H | 0.45564900 | -1.11481500 | 5.24161300  |
| H | 1.04835700 | -2.76537700 | 5.48144600  |
| H | 2.19705700 | -1.43087600 | 5.30347800  |
| C | 0.79413300 | -4.62491400 | 1.76125400  |
| H | 0.72077500 | -5.10778300 | 2.74072700  |
| H | 0.57502400 | -5.37573100 | 1.00108700  |
| H | 1.83296400 | -4.30664000 | 1.62652700  |

S\*\*2 before annihilation      0.0000,      after      0.0000

**S-IM3**<sup>CSS</sup>

|   |             |             |             |
|---|-------------|-------------|-------------|
| C | 1.02040800  | -2.96520600 | 2.53020800  |
| C | 0.15340200  | -3.93797300 | 1.70469400  |
| C | 2.33651900  | -2.48210800 | 1.89546600  |
| H | -0.63094900 | -4.30741100 | 2.37537400  |
| H | 0.43612900  | -2.09312200 | 2.84230100  |
| H | 1.28796600  | -3.49162600 | 3.45441900  |
| H | 2.82839900  | -3.33188000 | 1.41180600  |
| P | 2.00793600  | -1.26895400 | 0.51865500  |
| P | -0.77130500 | -3.09415300 | 0.32867500  |
| C | 3.65264000  | -0.81708600 | -0.12000100 |
| C | 3.84789000  | 0.45091900  | -0.69110100 |
| C | 4.69788700  | -1.75409500 | -0.15390300 |
| C | 5.07301500  | 0.77562200  | -1.27088300 |
| H | 3.04682800  | 1.18001800  | -0.69434000 |
| C | 5.91952900  | -1.42519800 | -0.74006000 |
| H | 4.56605200  | -2.74425700 | 0.26910600  |
| C | 6.10898600  | -0.15890500 | -1.29586000 |
| H | 5.20720600  | 1.75708800  | -1.71364000 |
| H | 6.71483800  | -2.16095000 | -0.78132200 |
| H | 7.05823400  | 0.09126400  | -1.75594800 |
| C | 1.39760300  | 0.24610500  | 1.33978700  |
| C | 2.25629200  | 1.12874600  | 2.01569400  |

|    |             |             |             |
|----|-------------|-------------|-------------|
| C  | 0.02670700  | 0.53274200  | 1.29187700  |
| C  | 1.74376700  | 2.26954900  | 2.62993700  |
| H  | 3.32249800  | 0.93627200  | 2.04565700  |
| C  | -0.48607700 | 1.67124700  | 1.91219200  |
| H  | -0.64864900 | -0.12419100 | 0.76106400  |
| C  | 0.37350700  | 2.54222300  | 2.58168800  |
| H  | 2.41496300  | 2.94826800  | 3.14638100  |
| H  | -1.55186000 | 1.86962200  | 1.86583700  |
| H  | -0.01887000 | 3.43252600  | 3.06282200  |
| C  | -2.07032200 | -2.08961100 | 1.13930600  |
| C  | -2.87995200 | -1.29361000 | 0.30943000  |
| C  | -2.28220300 | -2.07615600 | 2.52481600  |
| C  | -3.87328900 | -0.49109100 | 0.86557500  |
| H  | -2.70297100 | -1.29630800 | -0.76057400 |
| C  | -3.27942500 | -1.26914300 | 3.07401200  |
| H  | -1.68380600 | -2.68599800 | 3.19064000  |
| C  | -4.07247900 | -0.47250800 | 2.24861700  |
| H  | -4.49434400 | 0.11935800  | 0.21748700  |
| H  | -3.43460100 | -1.26605200 | 4.14815000  |
| H  | -4.84619600 | 0.15483600  | 2.67961900  |
| C  | -1.71085900 | -4.42878800 | -0.49398300 |
| C  | -2.46862100 | -5.30544500 | 0.30047700  |
| C  | -3.20046000 | -6.33050800 | -0.29354300 |
| H  | -2.50246000 | -5.18340000 | 1.37891000  |
| C  | -2.46105000 | -5.59963800 | -2.47566100 |
| C  | -3.19399300 | -6.48196600 | -1.68300200 |
| H  | -3.78159300 | -7.00579400 | 0.32618500  |
| H  | -2.46842700 | -5.69469600 | -3.55697400 |
| H  | -3.76873500 | -7.27951300 | -2.14293700 |
| Co | 0.47352500  | -1.86890600 | -1.04719900 |
| C  | 0.88459200  | -0.48202600 | -3.07380700 |
| C  | 1.23580100  | 0.95533800  | -2.93010300 |
| C  | 2.11845200  | 1.61296000  | -3.79858600 |
| C  | 0.67126200  | 1.67588800  | -1.86641800 |
| C  | 2.47078600  | 2.94314700  | -3.56770600 |
| H  | 2.51797400  | 1.09541300  | -4.66452600 |
| C  | 1.03595500  | 2.99805000  | -1.62518900 |
| H  | -0.03319300 | 1.18440400  | -1.20535700 |
| C  | 1.94784600  | 3.63293700  | -2.47200300 |
| H  | 3.15164700  | 3.44169900  | -4.25030100 |
| H  | 0.61219700  | 3.52502200  | -0.77612000 |
| H  | 2.23399000  | 4.66406300  | -2.29102600 |
| C  | 1.81792500  | -1.46483500 | -3.16211800 |
| C  | 3.30695100  | -1.33930400 | -3.39024400 |

|   |             |             |             |
|---|-------------|-------------|-------------|
| H | 3.64358700  | -0.37282400 | -3.74453700 |
| H | 3.87984000  | -1.61360300 | -2.49813200 |
| N | 3.43487200  | -2.35701500 | -4.43881100 |
| C | 2.71880200  | -3.56348900 | -4.01829300 |
| H | 2.39640600  | -4.12864400 | -4.89210300 |
| H | 3.33858300  | -4.21061500 | -3.38004800 |
| S | 4.76455000  | -2.39964100 | -5.44274100 |
| O | 4.50930000  | -3.49687500 | -6.37308700 |
| O | 4.97720500  | -1.01679000 | -5.87351100 |
| C | 6.15657000  | -2.85200000 | -4.41154200 |
| C | 6.26847700  | -4.16641400 | -3.94880100 |
| C | 7.10966500  | -1.88420200 | -4.09524700 |
| C | 7.34618700  | -4.50511600 | -3.13240200 |
| H | 5.54650800  | -4.91459600 | -4.25617600 |
| C | 8.19765600  | -2.24214400 | -3.29833300 |
| H | 7.00051600  | -0.88219700 | -4.49312100 |
| C | 8.31034900  | -3.54533100 | -2.80961100 |
| H | 7.44946900  | -5.52310000 | -2.77068200 |
| H | 8.96154200  | -1.50641000 | -3.06648000 |
| C | -1.71913000 | -4.57577300 | -1.88580300 |
| H | -1.18773300 | -3.86494500 | -2.50033100 |
| C | 1.52942600  | -2.97016800 | -3.20504600 |
| C | 1.46433400  | -3.40999200 | -1.74941700 |
| C | 3.26919600  | -1.92096200 | 2.97747300  |
| H | 2.78286700  | -1.11442700 | 3.53229200  |
| H | 3.52135700  | -2.71328100 | 3.68909200  |
| H | 4.20155500  | -1.53529600 | 2.55988300  |
| C | 0.93542100  | -5.16483200 | 1.21456200  |
| H | 1.42868900  | -5.64325800 | 2.06681000  |
| H | 0.27182100  | -5.89808200 | 0.75302500  |
| H | 1.70392500  | -4.90616700 | 0.48498300  |
| H | 0.58508300  | -3.17363400 | -3.70850000 |
| H | 2.45800500  | -3.47338300 | -1.29905500 |
| H | 0.92114900  | -4.34116600 | -1.59613900 |
| H | 9.16048900  | -3.82041500 | -2.19314100 |
| C | -2.53271500 | -2.89757200 | -5.74441800 |
| C | -1.77344500 | -2.71959400 | -6.90252900 |
| C | -0.63496000 | -1.91381400 | -6.86389700 |
| C | -0.25084800 | -1.29728400 | -5.67230900 |
| C | -0.99932700 | -1.48349800 | -4.50547800 |
| C | -2.15018000 | -2.27993800 | -4.55395000 |
| H | -3.42555900 | -3.51547800 | -5.76770500 |
| H | -2.06739300 | -3.20324700 | -7.82867100 |
| H | -0.03782900 | -1.76962900 | -7.75875200 |

|   |             |             |             |
|---|-------------|-------------|-------------|
| H | 0.64746700  | -0.68892200 | -5.65547400 |
| H | -2.73250000 | -2.42331900 | -3.65082600 |
| C | -0.62058700 | -0.83409000 | -3.17734600 |
| O | -0.99439500 | -1.64789600 | -2.08514500 |
| H | -1.16791500 | 0.11475100  | -3.08920500 |

S\*\*2 before annihilation    -0.0000,    after    -0.0000

*R-IM3*<sup>CSS</sup>

|   |             |             |             |
|---|-------------|-------------|-------------|
| C | -0.10201200 | -2.56428100 | 2.94561600  |
| C | -0.18503800 | -3.49991200 | 1.72390900  |
| C | 1.29522400  | -2.01252200 | 3.29475800  |
| H | -1.20500600 | -3.89768500 | 1.68352000  |
| H | -0.80977300 | -1.73399100 | 2.84671500  |
| H | -0.44519500 | -3.14744300 | 3.80819800  |
| H | 2.04877500  | -2.76992600 | 3.05542300  |
| P | 1.72876500  | -0.56373900 | 2.20896100  |
| P | 0.02859500  | -2.55279900 | 0.13046800  |
| C | 3.38360500  | -0.02299500 | 2.73655300  |
| C | 3.73253600  | 1.33140700  | 2.62463900  |
| C | 4.34437900  | -0.94627700 | 3.17759900  |
| C | 5.01827600  | 1.75228500  | 2.96058200  |
| H | 3.00530000  | 2.04816800  | 2.26404900  |
| C | 5.63006400  | -0.52033800 | 3.50821600  |
| H | 4.09885800  | -1.99907400 | 3.27011200  |
| C | 5.96898600  | 0.82926100  | 3.39959400  |
| H | 5.27850500  | 2.80191100  | 2.87013900  |
| H | 6.36352700  | -1.24179400 | 3.85336400  |
| H | 6.96949700  | 1.16016100  | 3.65880100  |
| C | 0.61107100  | 0.78954900  | 2.69497000  |
| C | 0.74890800  | 1.43240300  | 3.93780700  |
| C | -0.41508300 | 1.18413700  | 1.82938600  |
| C | -0.14733200 | 2.43222800  | 4.30827500  |
| H | 1.56291500  | 1.16866200  | 4.60268600  |
| C | -1.31183300 | 2.18348100  | 2.20455500  |
| H | -0.51137000 | 0.71797200  | 0.86057500  |
| C | -1.18235200 | 2.80482700  | 3.44620500  |
| H | -0.03405500 | 2.92571500  | 5.26819100  |
| H | -2.10359300 | 2.47371200  | 1.52174700  |
| H | -1.87699000 | 3.58529800  | 3.74011800  |
| C | -1.49266200 | -1.54239400 | -0.01253300 |
| C | -1.46597900 | -0.49060900 | -0.94321800 |
| C | -2.64851700 | -1.73425000 | 0.75637000  |
| C | -2.56767500 | 0.34543900  | -1.11111200 |
| H | -0.58063100 | -0.31763900 | -1.54118100 |



|    |             |             |             |
|----|-------------|-------------|-------------|
| C  | -3.74416500 | -0.88400900 | 0.60314100  |
| H  | -2.71080300 | -2.53934200 | 1.47874300  |
| C  | -3.70861900 | 0.15411400  | -0.32989400 |
| H  | -2.52653700 | 1.14208500  | -1.84689600 |
| H  | -4.63022300 | -1.03838500 | 1.21045300  |
| H  | -4.56748800 | 0.80691800  | -0.44848200 |
| C  | -0.12542200 | -3.80311800 | -1.19669300 |
| C  | -1.22417100 | -3.80856600 | -2.06792700 |
| C  | -1.29849400 | -4.74794300 | -3.09800400 |
| H  | -2.01883000 | -3.08190600 | -1.94626500 |
| C  | 0.81046000  | -5.69748800 | -2.39933600 |
| C  | -0.28798700 | -5.69466300 | -3.26143600 |
| H  | -2.15252600 | -4.74079400 | -3.76793000 |
| H  | 1.60717100  | -6.41953500 | -2.53551300 |
| H  | -0.34368500 | -6.42370200 | -4.06162800 |
| Co | 1.67811300  | -0.97579300 | 0.01375500  |
| C  | 2.12188900  | -0.21401500 | -2.38067400 |
| C  | 1.11058600  | 0.17838800  | -3.39174500 |
| C  | 0.10939800  | -0.71739200 | -3.81621800 |
| C  | 1.13357600  | 1.46089000  | -3.97165100 |
| C  | -0.82682800 | -0.34877300 | -4.77734100 |
| H  | 0.03816900  | -1.69936200 | -3.36397800 |
| C  | 0.20310200  | 1.82464100  | -4.94283400 |
| H  | 1.90230900  | 2.17191400  | -3.69177300 |
| C  | -0.78339800 | 0.92461600  | -5.34760300 |
| H  | -1.59320300 | -1.05682900 | -5.07681100 |
| H  | 0.25299700  | 2.81386800  | -5.38624600 |
| H  | -1.51034300 | 1.21267600  | -6.10006700 |
| C  | 2.62367300  | -1.48276500 | -2.32747600 |
| C  | 2.44662500  | -2.52993200 | -3.41509000 |
| H  | 1.63756100  | -3.23827600 | -3.20669900 |
| H  | 2.27797800  | -2.08092300 | -4.39378200 |
| N  | 3.75751300  | -3.17375700 | -3.37669600 |
| C  | 4.26161300  | -3.26689200 | -2.01688800 |
| H  | 3.86800200  | -4.15182300 | -1.49352300 |
| H  | 5.34996700  | -3.32084900 | -2.02374500 |
| S  | 4.40670100  | -3.99727500 | -4.66174500 |
| O  | 3.89863400  | -3.33550800 | -5.86321700 |
| O  | 5.83088800  | -4.13685500 | -4.36281100 |
| C  | 3.68813500  | -5.63668700 | -4.61195000 |
| C  | 2.61411200  | -5.93649900 | -5.44936600 |
| C  | 4.21810800  | -6.58488100 | -3.73300500 |
| C  | 2.05954200  | -7.21615300 | -5.40381000 |
| H  | 2.24803000  | -5.18293700 | -6.13692000 |

|   |            |             |             |
|---|------------|-------------|-------------|
| C | 3.64631400 | -7.85579000 | -3.68648900 |
| H | 5.08264900 | -6.33644300 | -3.12749100 |
| H | 1.23976200 | -7.47151600 | -6.06804800 |
| H | 4.05361700 | -8.60663600 | -3.01701200 |
| C | 0.89616400 | -4.75069900 | -1.38160600 |
| H | 1.77047900 | -4.74189400 | -0.74245600 |
| C | 3.73366300 | -1.96139300 | -1.36775700 |
| H | 4.52267900 | -1.20563000 | -1.38397600 |
| C | 3.23531300 | -2.12629500 | 0.05939600  |
| H | 2.95667200 | -3.15165800 | 0.30571100  |
| H | 3.93543600 | -1.73305700 | 0.79297200  |
| C | 4.66838000 | 1.16638700  | -3.11153800 |
| C | 6.02080100 | 1.37780400  | -3.37686400 |
| C | 6.92255200 | 1.55896000  | -2.32588200 |
| C | 6.46173800 | 1.52783700  | -1.00955000 |
| C | 5.10841700 | 1.31606500  | -0.74270600 |
| C | 4.20285400 | 1.13369600  | -1.79085000 |
| H | 3.98319900 | 1.00200900  | -3.93825800 |
| H | 6.37152900 | 1.39019300  | -4.40401400 |
| H | 7.97600100 | 1.71729700  | -2.53393600 |
| H | 7.15575500 | 1.66206400  | -0.18483000 |
| H | 4.74509300 | 1.27242000  | 0.27489000  |
| O | 2.49367600 | 0.62002700  | -0.13185000 |
| C | 2.72588800 | 0.90273900  | -1.48712700 |
| H | 2.17756900 | 1.82470500  | -1.71787000 |
| C | 2.56862200 | -8.17079300 | -4.52058900 |
| H | 2.13756600 | -9.16654300 | -4.49256500 |
| C | 1.38205500 | -1.69223600 | 4.79389000  |
| H | 0.58168500 | -1.01187200 | 5.09445600  |
| H | 1.26840300 | -2.61761400 | 5.36709100  |
| H | 2.33872100 | -1.24206100 | 5.06631900  |
| C | 0.75415000 | -4.70769700 | 1.85290400  |
| H | 0.63758100 | -5.14859000 | 2.84817700  |
| H | 0.51481400 | -5.47738300 | 1.11877100  |
| H | 1.80799600 | -4.44293900 | 1.73152600  |

S\*\*2 before annihilation    -0.0000,    after    -0.0000

**S-TS3**<sup>CSS</sup>

|    |             |             |            |
|----|-------------|-------------|------------|
| Co | 2.84172200  | -0.86859000 | 0.09195100 |
| C  | 1.30363400  | 0.43460100  | 2.63977300 |
| C  | 0.38198600  | 1.49727000  | 3.12419100 |
| C  | 0.88724700  | 2.65015300  | 3.74139300 |
| C  | -1.00458500 | 1.37150600  | 2.95484600 |
| C  | 0.02515600  | 3.65139900  | 4.18365100 |

|   |             |             |             |
|---|-------------|-------------|-------------|
| H | 1.95924000  | 2.75957000  | 3.87457300  |
| C | -1.86696600 | 2.37476100  | 3.39457600  |
| H | -1.40040900 | 0.49317000  | 2.45535400  |
| C | -1.35383300 | 3.51742000  | 4.01023100  |
| H | 0.42929900  | 4.53598000  | 4.66542800  |
| H | -2.93844800 | 2.26625900  | 3.25566600  |
| H | -2.02404300 | 4.29888900  | 4.35369800  |
| C | 1.20124700  | -0.83818100 | 3.07180500  |
| C | 0.19331300  | -1.29516100 | 4.09702700  |
| H | -0.79651900 | -1.40725500 | 3.62454800  |
| H | 0.08619800  | -0.61210300 | 4.94067200  |
| N | 0.72977500  | -2.59176500 | 4.53350700  |
| C | 1.40628700  | -3.22062600 | 3.39405700  |
| H | 0.68838400  | -3.71973100 | 2.72310800  |
| H | 2.13064000  | -3.95661200 | 3.74179800  |
| S | -0.28619600 | -3.55949400 | 5.46474400  |
| O | -0.80083200 | -2.69459600 | 6.52375800  |
| O | 0.46122900  | -4.78899400 | 5.72028000  |
| C | -1.65567400 | -3.96352300 | 4.37947800  |
| C | -2.76367000 | -3.11320400 | 4.33282800  |
| C | -1.57698100 | -5.10166700 | 3.57309000  |
| C | -3.80784900 | -3.40985700 | 3.45670100  |
| H | -2.81424800 | -2.26214900 | 5.00260100  |
| C | -2.62851200 | -5.38813400 | 2.70219200  |
| H | -0.72373500 | -5.76399600 | 3.66517500  |
| H | -4.68418100 | -2.76980600 | 3.42774300  |
| H | -2.59068100 | -6.28258300 | 2.08816300  |
| C | 2.05843500  | -2.02157400 | 2.66128000  |
| H | 3.06211400  | -1.86390400 | 3.06237800  |
| C | 2.14704100  | -2.34437900 | 1.16683800  |
| H | 1.15981500  | -2.61553700 | 0.79309000  |
| H | 2.83322700  | -3.18213400 | 1.02515300  |
| O | 3.51738900  | 0.20572500  | 1.65339000  |
| H | 1.59322900  | -0.02053700 | 0.46848000  |
| C | 2.35389100  | 0.80236200  | 1.62835000  |
| C | 2.30328400  | 2.12693700  | 0.91485100  |
| C | 1.11320900  | 2.64657800  | 0.38429800  |
| C | 3.50106100  | 2.82342700  | 0.72123800  |
| C | 1.12761800  | 3.82951000  | -0.34471300 |
| H | 0.17969200  | 2.12215400  | 0.54472200  |
| C | 3.51141300  | 4.02070300  | 0.00652300  |
| H | 4.41317000  | 2.42351800  | 1.14590700  |
| C | 2.32774700  | 4.52098100  | -0.53548100 |
| H | 0.20422000  | 4.21557800  | -0.76382600 |

|   |             |             |             |
|---|-------------|-------------|-------------|
| H | 4.44295800  | 4.56195200  | -0.12628300 |
| H | 2.33611600  | 5.44857000  | -1.09913400 |
| C | -3.74020400 | -4.54357600 | 2.64311300  |
| H | -4.56413400 | -4.78060600 | 1.97673200  |
| C | 3.39617200  | -2.71087900 | -3.08056700 |
| C | 4.39074200  | -3.18937200 | -1.99487700 |
| C | 1.90050800  | -2.69519400 | -2.71073100 |
| H | 5.35203900  | -3.34322300 | -2.49909500 |
| H | 3.68341400  | -1.72530400 | -3.46234200 |
| H | 3.50415200  | -3.40005100 | -3.92679900 |
| H | 1.67627700  | -3.58737000 | -2.11875600 |
| P | 1.50007200  | -1.26788600 | -1.59305300 |
| P | 4.69759300  | -1.89458200 | -0.69393100 |
| C | -0.22266800 | -1.52073800 | -1.04087400 |
| C | -0.98183300 | -0.40854200 | -0.64629400 |
| C | -0.72263500 | -2.80793900 | -0.79499200 |
| C | -2.21043400 | -0.58220000 | -0.01322500 |
| H | -0.60651300 | 0.59181300  | -0.82879000 |
| C | -1.94447700 | -2.97844200 | -0.14214700 |
| H | -0.15755500 | -3.68669200 | -1.08690900 |
| C | -2.68667600 | -1.86780400 | 0.25614900  |
| H | -2.78943000 | 0.28795000  | 0.27962900  |
| H | -2.30637600 | -3.97777000 | 0.07206900  |
| H | -3.62707000 | -2.00572900 | 0.77805300  |
| C | 1.52598900  | 0.24695900  | -2.60281800 |
| C | 0.45133900  | 0.62994800  | -3.42074500 |
| C | 2.65860400  | 1.07203500  | -2.52100100 |
| C | 0.51681400  | 1.81995400  | -4.14297400 |
| H | -0.43692700 | 0.01047000  | -3.47903800 |
| C | 2.72007900  | 2.26041100  | -3.24547600 |
| H | 3.49868700  | 0.79919700  | -1.89334200 |
| C | 1.64884600  | 2.63510100  | -4.05613300 |
| H | -0.31703400 | 2.11284200  | -4.77293800 |
| H | 3.59885600  | 2.88986800  | -3.16128500 |
| H | 1.69076000  | 3.56294800  | -4.61774400 |
| C | 5.63822200  | -0.55666700 | -1.51649300 |
| C | 5.84183900  | 0.60759900  | -0.75587500 |
| C | 6.08804800  | -0.59871500 | -2.84251300 |
| C | 6.46924900  | 1.71526200  | -1.32099200 |
| H | 5.48572900  | 0.64079400  | 0.26820800  |
| C | 6.71351800  | 0.51482400  | -3.40470700 |
| H | 5.95850100  | -1.48889900 | -3.44698300 |
| C | 6.89879700  | 1.67389500  | -2.64960500 |
| H | 6.61901300  | 2.61081000  | -0.72641000 |

|   |             |             |             |
|---|-------------|-------------|-------------|
| H | 7.05708200  | 0.47490100  | -4.43344600 |
| H | 7.38271600  | 2.53835200  | -3.09282600 |
| C | 5.84742100  | -2.62511300 | 0.51309600  |
| C | 6.89843500  | -3.46796800 | 0.12016000  |
| C | 7.77221300  | -3.98200700 | 1.07526200  |
| H | 7.04176500  | -3.72082000 | -0.92605600 |
| C | 6.58183600  | -2.79339800 | 2.81459400  |
| C | 7.61135100  | -3.64931800 | 2.42330300  |
| H | 8.58075200  | -4.63807600 | 0.76918400  |
| H | 6.46349400  | -2.52403600 | 3.85935300  |
| H | 8.29372500  | -4.05255200 | 3.16465400  |
| C | 5.69878500  | -2.28053600 | 1.86349400  |
| H | 4.91239600  | -1.59470400 | 2.15612700  |
| C | 1.01904400  | -2.70287700 | -3.96708200 |
| H | 1.23850900  | -1.84334100 | -4.60594800 |
| H | 1.20851400  | -3.61210900 | -4.54577500 |
| H | -0.04445000 | -2.68005300 | -3.71580500 |
| C | 3.97947600  | -4.52947300 | -1.36673600 |
| H | 3.76786700  | -5.25784700 | -2.15625900 |
| H | 4.77290400  | -4.93419200 | -0.73681300 |
| H | 3.08397900  | -4.43856900 | -0.74731600 |

S\*\*2 before annihilation      0.0000,      after      -0.0000

*R-TS3*<sup>CSS</sup>

|   |            |             |             |
|---|------------|-------------|-------------|
| C | 3.85756400 | -2.93979500 | 2.98447000  |
| C | 2.33250700 | -2.69439300 | 3.04326800  |
| C | 4.45594500 | -3.38980600 | 1.63873300  |
| H | 4.40660200 | -2.06146400 | 3.33881100  |
| H | 4.06933500 | -3.73553800 | 3.70910900  |
| H | 3.76986800 | -4.10603300 | 1.17603200  |
| P | 4.54055900 | -1.97169800 | 0.44018300  |
| P | 1.80278300 | -1.13487000 | 2.17898900  |
| C | 5.05563500 | -2.69224600 | -1.15040700 |
| C | 5.62297400 | -1.84644700 | -2.11784600 |
| C | 4.74187400 | -4.01515400 | -1.49618900 |
| C | 5.87167800 | -2.32046200 | -3.40389200 |
| H | 5.85115500 | -0.81725600 | -1.86762800 |
| C | 4.99016400 | -4.48378800 | -2.78661800 |
| H | 4.30133200 | -4.68872100 | -0.76954100 |
| C | 5.55211800 | -3.63747000 | -3.74310300 |
| H | 6.31165000 | -1.65914300 | -4.14352600 |
| H | 4.74781100 | -5.51078100 | -3.04082800 |
| H | 5.74494300 | -4.00321200 | -4.74655700 |
| C | 5.90710400 | -0.88853600 | 0.96788500  |

|    |             |             |             |
|----|-------------|-------------|-------------|
| C  | 7.25379800  | -1.22053100 | 0.74781400  |
| C  | 5.59228300  | 0.32207000  | 1.60239200  |
| C  | 8.26340200  | -0.35964600 | 1.17320500  |
| H  | 7.50934500  | -2.13896400 | 0.23093700  |
| C  | 6.60537300  | 1.17960600  | 2.02930100  |
| H  | 4.55941800  | 0.60366100  | 1.76223600  |
| C  | 7.94115700  | 0.83833400  | 1.81722100  |
| H  | 9.30229600  | -0.62113400 | 0.99915900  |
| H  | 6.34391800  | 2.11081200  | 2.52124100  |
| H  | 8.73196400  | 1.50564900  | 2.14518700  |
| C  | 2.46394100  | 0.24584900  | 3.18323700  |
| C  | 2.28509200  | 1.54283400  | 2.67371000  |
| C  | 3.17143600  | 0.07552800  | 4.38209500  |
| C  | 2.82533300  | 2.64342200  | 3.33591900  |
| H  | 1.72756600  | 1.69443600  | 1.75710700  |
| C  | 3.71299000  | 1.17916200  | 5.04061700  |
| H  | 3.30676400  | -0.90819700 | 4.81466700  |
| C  | 3.55033800  | 2.46207500  | 4.51501900  |
| H  | 2.68148800  | 3.63457700  | 2.92158200  |
| H  | 4.26072900  | 1.03518800  | 5.96649800  |
| H  | 3.97726000  | 3.31725100  | 5.02939100  |
| C  | -0.00275900 | -1.05581100 | 2.40858400  |
| C  | -0.54434900 | -1.18578900 | 3.69884000  |
| C  | -1.92330900 | -1.14710400 | 3.88295300  |
| H  | 0.10805200  | -1.30197300 | 4.55942400  |
| C  | -2.23874900 | -0.84524400 | 1.50350700  |
| C  | -2.77238200 | -0.98366000 | 2.78346300  |
| H  | -2.33707500 | -1.24405600 | 4.88164500  |
| H  | -2.88479100 | -0.73580100 | 0.63950500  |
| H  | -3.84776600 | -0.96548600 | 2.92985200  |
| Co | 2.65195000  | -0.75968200 | 0.18941000  |
| C  | 1.23956200  | 0.44080600  | -2.38500900 |
| C  | 0.34979200  | 1.49497600  | -2.95095300 |
| C  | 0.87567200  | 2.55637900  | -3.69719900 |
| C  | -1.03324800 | 1.44653400  | -2.71194800 |
| C  | 0.03703200  | 3.55112100  | -4.19928300 |
| H  | 1.94550800  | 2.60559500  | -3.87710600 |
| C  | -1.86952800 | 2.44330400  | -3.21328200 |
| H  | -1.43711100 | 0.62739600  | -2.12472500 |
| C  | -1.33647800 | 3.49802000  | -3.95758100 |
| H  | 0.45635000  | 4.36839400  | -4.77765300 |
| H  | -2.93686600 | 2.40156300  | -3.01681500 |
| H  | -1.98753300 | 4.27507600  | -4.34548100 |
| C  | 1.14499300  | -0.84049000 | -2.78837200 |

|   |             |             |             |
|---|-------------|-------------|-------------|
| C | 0.21535500  | -1.33479800 | -3.87760600 |
| H | -0.69407400 | -0.75272200 | -4.00304100 |
| H | 0.73931200  | -1.33903100 | -4.84280800 |
| N | -0.06764100 | -2.74081500 | -3.52741200 |
| C | 1.20262000  | -3.24580800 | -2.96656800 |
| H | 1.01672600  | -4.11322600 | -2.33413800 |
| H | 1.82489600  | -3.56035700 | -3.81004400 |
| S | -1.41799000 | -2.90128100 | -2.48794700 |
| O | -1.30939900 | -4.22950900 | -1.87924700 |
| O | -1.56064000 | -1.71102900 | -1.62263000 |
| C | -2.75112200 | -2.86661300 | -3.66702900 |
| C | -3.03854000 | -4.02931600 | -4.38421900 |
| C | -3.46917400 | -1.68530600 | -3.85327500 |
| C | -4.07221200 | -3.99924000 | -5.31683400 |
| H | -2.46890900 | -4.93351100 | -4.20255500 |
| C | -4.49788200 | -1.66938500 | -4.79515800 |
| H | -3.22890800 | -0.80687400 | -3.26625200 |
| H | -4.31494500 | -4.89398600 | -5.88046300 |
| H | -5.06767500 | -0.75990600 | -4.95489700 |
| C | -0.85622600 | -0.87120300 | 1.31586400  |
| H | -0.45839400 | -0.76238400 | 0.31623200  |
| C | 1.87056100  | -2.04678700 | -2.22066800 |
| H | 2.92939800  | -2.00123600 | -2.47491800 |
| C | 1.72459600  | -2.21097500 | -0.70616500 |
| H | 0.67855800  | -2.23362800 | -0.40447200 |
| H | 2.19669900  | -3.14701100 | -0.40024500 |
| O | 3.37770000  | 0.15374800  | -1.30641400 |
| H | 1.44479200  | 0.14628600  | -0.04812000 |
| C | 2.25618200  | 0.82329000  | -1.34722200 |
| C | 2.30893500  | 2.21418700  | -0.77985900 |
| C | 1.15960600  | 2.93962900  | -0.43209500 |
| C | 3.57234200  | 2.77176300  | -0.54326800 |
| C | 1.27710300  | 4.20943800  | 0.12570800  |
| H | 0.17751700  | 2.51153700  | -0.58833500 |
| C | 3.68641600  | 4.04907200  | 0.00332200  |
| H | 4.45388600  | 2.19338900  | -0.79204100 |
| C | 2.54015400  | 4.77226900  | 0.33545100  |
| H | 0.38259200  | 4.76279400  | 0.39268800  |
| H | 4.66964300  | 4.47772200  | 0.16982900  |
| H | 2.62705800  | 5.76868900  | 0.75781200  |
| C | -4.79677700 | -2.82175300 | -5.52371500 |
| H | -5.60044900 | -2.80532200 | -6.25292300 |
| C | 5.81323100  | -4.07373900 | 1.84864400  |
| H | 6.51167900  | -3.40729000 | 2.36165900  |

|   |            |             |            |
|---|------------|-------------|------------|
| H | 5.68566100 | -4.96868300 | 2.46560500 |
| H | 6.26662600 | -4.37857400 | 0.90236800 |
| H | 2.08118500 | -2.53652500 | 4.09907900 |
| C | 1.50901300 | -3.89640800 | 2.55591200 |
| H | 1.85273300 | -4.80595200 | 3.05883300 |
| H | 0.44957900 | -3.76380700 | 2.78189600 |
| H | 1.59418100 | -4.05478100 | 1.47883900 |

S\*\*2 before annihilation      0.0000,      after      -0.0000

*S-IM4*<sup>CSS</sup>

|   |             |             |             |
|---|-------------|-------------|-------------|
| C | 0.67398600  | -3.59402600 | 2.69485700  |
| C | -0.27887200 | -4.20883900 | 1.64349300  |
| C | 2.15110700  | -3.39625600 | 2.29634200  |
| H | -1.22039300 | -4.44128400 | 2.15476300  |
| H | 0.27827700  | -2.64525900 | 3.07205700  |
| H | 0.66903400  | -4.27756300 | 3.55282000  |
| H | 2.46964300  | -4.24928500 | 1.68867500  |
| P | 2.37196600  | -1.91093100 | 1.19094400  |
| P | -0.71627700 | -2.99786500 | 0.29391900  |
| C | 4.13920100  | -1.89698700 | 0.73712300  |
| C | 4.71121900  | -0.69518300 | 0.29256800  |
| C | 4.89089500  | -3.07772200 | 0.66959300  |
| C | 6.01496100  | -0.67600300 | -0.19650500 |
| H | 4.13226200  | 0.22183900  | 0.32272500  |
| C | 6.19342100  | -3.05644600 | 0.17026900  |
| H | 4.46843100  | -4.02215500 | 0.99423900  |
| C | 6.75698500  | -1.85781400 | -0.26315000 |
| H | 6.45004500  | 0.26058600  | -0.53066500 |
| H | 6.76017300  | -3.97884700 | 0.11111000  |
| H | 7.76834400  | -1.84365400 | -0.65521000 |
| C | 2.09113200  | -0.46242500 | 2.26153100  |
| C | 3.07947600  | 0.05424600  | 3.11303300  |
| C | 0.82249100  | 0.13787800  | 2.23608900  |
| C | 2.79425400  | 1.14706300  | 3.93008400  |
| H | 4.06930200  | -0.38877300 | 3.12859500  |
| C | 0.53946100  | 1.22780700  | 3.05827200  |
| H | 0.04501100  | -0.24778700 | 1.58570500  |
| C | 1.52557900  | 1.73239200  | 3.90659500  |
| H | 3.56299100  | 1.54276800  | 4.58616900  |
| H | -0.44915800 | 1.67467300  | 3.03332400  |
| H | 1.30964900  | 2.58202800  | 4.54652700  |
| C | -1.89560500 | -1.82579300 | 1.06747000  |
| C | -2.39301400 | -0.79339900 | 0.25184700  |
| C | -2.26594900 | -1.85767200 | 2.41900300  |



|    |             |             |             |
|----|-------------|-------------|-------------|
| C  | -3.22791900 | 0.18778400  | 0.78096300  |
| H  | -2.11803200 | -0.76248400 | -0.79483400 |
| C  | -3.09473400 | -0.86653600 | 2.94826700  |
| H  | -1.91822500 | -2.64796900 | 3.07281300  |
| C  | -3.57304400 | 0.16043700  | 2.13445300  |
| H  | -3.60810800 | 0.97136600  | 0.13274400  |
| H  | -3.36973400 | -0.90312100 | 3.99759000  |
| H  | -4.21849800 | 0.92797300  | 2.54954900  |
| C  | -1.74666900 | -3.95177400 | -0.88143300 |
| C  | -3.14724700 | -3.92225000 | -0.83494000 |
| C  | -3.89636300 | -4.66220400 | -1.75043600 |
| H  | -3.65337100 | -3.31915200 | -0.08967800 |
| C  | -1.86372100 | -5.48354400 | -2.76434500 |
| C  | -3.25862700 | -5.44103300 | -2.71646700 |
| H  | -4.98041400 | -4.63027700 | -1.70604300 |
| H  | -1.36119700 | -6.09192900 | -3.50986100 |
| H  | -3.84465000 | -6.01382000 | -3.42795900 |
| Co | 1.05972100  | -1.66328100 | -0.53884000 |
| C  | 1.40554300  | -0.37199600 | -3.70112400 |
| C  | 1.92394600  | 0.80263800  | -4.46314400 |
| C  | 2.06383400  | 0.76211100  | -5.85795500 |
| C  | 2.26063900  | 1.97699200  | -3.77796600 |
| C  | 2.53689400  | 1.87422800  | -6.55196400 |
| H  | 1.78926700  | -0.13944200 | -6.39844200 |
| C  | 2.73358200  | 3.08940700  | -4.47284900 |
| H  | 2.14862500  | 2.01594300  | -2.69797900 |
| C  | 2.87253300  | 3.04014300  | -5.86065600 |
| H  | 2.63915100  | 1.83125500  | -7.63158100 |
| H  | 2.99239000  | 3.99392500  | -3.93141300 |
| H  | 3.23848500  | 3.90659400  | -6.40211900 |
| C  | 2.04972100  | -1.56680800 | -3.70014400 |
| C  | 3.33027000  | -1.85126000 | -4.43283700 |
| H  | 3.54643000  | -1.19172200 | -5.26770800 |
| H  | 4.16929600  | -1.78795500 | -3.71247800 |
| N  | 3.08985600  | -3.22056100 | -4.89565500 |
| C  | 2.34952000  | -3.96762900 | -3.86767200 |
| H  | 1.66255000  | -4.66866900 | -4.34414200 |
| H  | 3.02588700  | -4.53491700 | -3.21307500 |
| S  | 4.31289000  | -4.00136500 | -5.74172700 |
| O  | 3.77523200  | -5.31873800 | -6.07541100 |
| O  | 4.77181600  | -3.04131900 | -6.74373200 |
| C  | 5.63127700  | -4.22458700 | -4.55251600 |
| C  | 5.66704300  | -5.38974000 | -3.78246500 |
| C  | 6.58693900  | -3.21667600 | -4.39862600 |

|   |             |             |             |
|---|-------------|-------------|-------------|
| C | 6.68136900  | -5.54271500 | -2.83747700 |
| H | 4.93691300  | -6.17128700 | -3.95929400 |
| C | 7.59671600  | -3.38387700 | -3.45209200 |
| H | 6.55421000  | -2.34351800 | -5.04019700 |
| C | 7.64314300  | -4.54316100 | -2.67444900 |
| H | 6.73412700  | -6.45139700 | -2.24622100 |
| H | 8.35763800  | -2.61867700 | -3.33703500 |
| C | -1.11303800 | -4.74068900 | -1.85561800 |
| H | -0.03139100 | -4.78705000 | -1.89611700 |
| C | 1.61841400  | -2.86076700 | -3.04916600 |
| C | 2.05998700  | -2.92149200 | -1.58186200 |
| C | 3.03315100  | -3.31840800 | 3.55117500  |
| H | 2.69922500  | -2.51363200 | 4.21154600  |
| H | 2.96845800  | -4.25934900 | 4.10636500  |
| H | 4.08267100  | -3.14212700 | 3.30644400  |
| C | 0.26120300  | -5.52574700 | 1.06878800  |
| H | 0.58330200  | -6.17965800 | 1.88574400  |
| H | -0.50388600 | -6.05144400 | 0.49634100  |
| H | 1.12021300  | -5.37245100 | 0.40879700  |
| H | 0.53526300  | -2.98255400 | -3.11256200 |
| H | 3.13351300  | -2.74015000 | -1.50667000 |
| H | 1.84503900  | -3.91169500 | -1.16393700 |
| H | 8.44314900  | -4.67650500 | -1.95250100 |
| C | -2.37571300 | 2.53281100  | -2.46688300 |
| C | -2.72302500 | 2.81053200  | -3.79197600 |
| C | -2.10570200 | 2.12146800  | -4.83890000 |
| C | -1.13133900 | 1.16578200  | -4.56808100 |
| C | -0.79032500 | 0.87021200  | -3.23882500 |
| C | -1.42427200 | 1.55732600  | -2.18938400 |
| H | -2.84323200 | 3.08105000  | -1.65500700 |
| H | -3.47012300 | 3.56733900  | -4.00913600 |
| H | -2.37957200 | 2.33465200  | -5.86676500 |
| H | -0.64678200 | 0.64014600  | -5.38159000 |
| H | -1.14453000 | 1.33403700  | -1.16644400 |
| C | 0.19170100  | -0.17968000 | -2.90249100 |
| O | -0.05810200 | -0.87361800 | -1.87964400 |
| H | 2.11051600  | -0.71122200 | -0.89163200 |

S\*\*2 before annihilation      0.0000,      after      0.0000

**R-IM4**<sup>CSS</sup>

|   |            |             |            |
|---|------------|-------------|------------|
| C | 3.92277200 | -2.92589300 | 3.07794200 |
| C | 2.38313100 | -2.79558600 | 3.14640500 |
| C | 4.53545100 | -3.36171700 | 1.73338300 |
| H | 4.40708700 | -2.00146400 | 3.40985400 |

|   |             |             |             |
|---|-------------|-------------|-------------|
| H | 4.19781200  | -3.68770500 | 3.81778500  |
| H | 3.88589000  | -4.12267400 | 1.28978300  |
| P | 4.50098600  | -1.95239600 | 0.51988800  |
| P | 1.70905000  | -1.29708500 | 2.27420500  |
| C | 4.99976300  | -2.67474500 | -1.07843900 |
| C | 5.55329600  | -1.83778500 | -2.06167100 |
| C | 4.66617000  | -3.99455800 | -1.41851800 |
| C | 5.76832900  | -2.31468300 | -3.35289800 |
| H | 5.80149100  | -0.81171700 | -1.81722200 |
| C | 4.87901500  | -4.46702400 | -2.71420500 |
| H | 4.23698200  | -4.66418600 | -0.68135400 |
| C | 5.42710600  | -3.62820300 | -3.68496700 |
| H | 6.20098100  | -1.65898100 | -4.10204900 |
| H | 4.62039400  | -5.49197600 | -2.96087600 |
| H | 5.59412300  | -3.99694800 | -4.69195800 |
| C | 5.85256500  | -0.81967600 | 0.99074900  |
| C | 7.20251900  | -1.09883800 | 0.72278600  |
| C | 5.51709500  | 0.37919200  | 1.63719000  |
| C | 8.19410100  | -0.19841600 | 1.10741800  |
| H | 7.47419800  | -2.00988400 | 0.20092500  |
| C | 6.51179900  | 1.27712700  | 2.02367800  |
| H | 4.48070000  | 0.62010200  | 1.83600300  |
| C | 7.85097500  | 0.98867400  | 1.76061300  |
| H | 9.23508600  | -0.42122500 | 0.89564400  |
| H | 6.23265900  | 2.19847700  | 2.52472300  |
| H | 8.62726900  | 1.68708000  | 2.05721200  |
| C | 2.32216300  | 0.16592700  | 3.18884000  |
| C | 2.14381000  | 1.42392300  | 2.58387200  |
| C | 3.02618700  | 0.08610400  | 4.39938200  |
| C | 2.68238400  | 2.57035100  | 3.16591900  |
| H | 1.59319500  | 1.50141300  | 1.65254100  |
| C | 3.56158900  | 1.23582700  | 4.97871100  |
| H | 3.16400200  | -0.86573700 | 4.89859800  |
| C | 3.39988600  | 2.47696900  | 4.35940200  |
| H | 2.54394100  | 3.52841300  | 2.67802200  |
| H | 4.10558700  | 1.16135300  | 5.91495400  |
| H | 3.82297100  | 3.36814800  | 4.81227300  |
| C | -0.08823400 | -1.36360600 | 2.56546700  |
| C | -0.57652100 | -1.56088500 | 3.86834200  |
| C | -1.94818800 | -1.63096900 | 4.09585800  |
| H | 0.10819000  | -1.64687400 | 4.70712300  |
| C | -2.36202900 | -1.30752800 | 1.73513800  |
| C | -2.84266100 | -1.51153100 | 3.02754100  |
| H | -2.32054400 | -1.77783000 | 5.10475000  |

|    |             |             |             |
|----|-------------|-------------|-------------|
| H  | -3.04195100 | -1.22199600 | 0.89425000  |
| H  | -3.91110000 | -1.57650800 | 3.20800400  |
| Co | 2.49139600  | -0.83708800 | 0.31463900  |
| C  | 1.31468600  | 0.55358800  | -2.45694700 |
| C  | 0.43212600  | 1.58475800  | -3.08015700 |
| C  | 0.95125300  | 2.55066900  | -3.94914800 |
| C  | -0.93903500 | 1.60068000  | -2.77562800 |
| C  | 0.11701000  | 3.52139000  | -4.50440800 |
| H  | 2.01170800  | 2.54580700  | -4.18348500 |
| C  | -1.77019400 | 2.57255200  | -3.33067500 |
| H  | -1.33648300 | 0.85096300  | -2.09739400 |
| C  | -1.24352100 | 3.53570300  | -4.19518700 |
| H  | 0.52987900  | 4.26615100  | -5.17751600 |
| H  | -2.82753900 | 2.58383700  | -3.08352500 |
| H  | -1.89066300 | 4.29359800  | -4.62512300 |
| C  | 1.14383100  | -0.75861700 | -2.77303100 |
| C  | 0.17943800  | -1.22523600 | -3.84668800 |
| H  | -0.72524000 | -0.63158300 | -3.94438900 |
| H  | 0.69254500  | -1.19701700 | -4.81851600 |
| N  | -0.10722300 | -2.63404200 | -3.53558300 |
| C  | 1.16784100  | -3.15566900 | -3.00271400 |
| H  | 0.99223000  | -4.05117800 | -2.40830400 |
| H  | 1.78858900  | -3.42620600 | -3.86294000 |
| S  | -1.45211500 | -2.80122500 | -2.48518200 |
| O  | -1.34008900 | -4.13169200 | -1.88325300 |
| O  | -1.58570800 | -1.60947800 | -1.62012000 |
| C  | -2.79245400 | -2.76021700 | -3.65580300 |
| C  | -3.08383600 | -3.91754700 | -4.38002500 |
| C  | -3.51052800 | -1.57692800 | -3.82947800 |
| C  | -4.12186100 | -3.87976500 | -5.30747200 |
| H  | -2.51404300 | -4.82352200 | -4.20786200 |
| C  | -4.54369400 | -1.55346200 | -4.76639500 |
| H  | -3.26740300 | -0.70418300 | -3.23490200 |
| H  | -4.36796600 | -4.77011000 | -5.87657100 |
| H  | -5.11423900 | -0.64277800 | -4.91628600 |
| C  | -0.98868200 | -1.22412600 | 1.50381600  |
| H  | -0.63220500 | -1.05455000 | 0.49746500  |
| C  | 1.82117700  | -1.98701000 | -2.20144000 |
| H  | 2.89137200  | -1.94045800 | -2.40536400 |
| C  | 1.62558500  | -2.22565300 | -0.68892500 |
| H  | 0.57198500  | -2.30898000 | -0.43459800 |
| H  | 2.12031200  | -3.16957100 | -0.43951900 |
| O  | 3.28502800  | 0.14395100  | -1.19344900 |
| H  | 1.21421100  | -0.08968700 | 0.24187300  |

|   |             |             |             |
|---|-------------|-------------|-------------|
| C | 2.36658300  | 0.96376800  | -1.51746800 |
| C | 2.50501100  | 2.33753600  | -0.97090300 |
| C | 1.42106500  | 3.20238500  | -0.74061300 |
| C | 3.79515500  | 2.73433500  | -0.57081800 |
| C | 1.63244300  | 4.43995000  | -0.13710200 |
| H | 0.41753200  | 2.90712900  | -1.01293500 |
| C | 4.00437600  | 3.98184000  | 0.00439400  |
| H | 4.62054900  | 2.04874900  | -0.71752300 |
| C | 2.92246800  | 4.84016600  | 0.22018600  |
| H | 0.78814900  | 5.09659600  | 0.04552200  |
| H | 5.00724200  | 4.28282500  | 0.28988700  |
| H | 3.08275200  | 5.81543800  | 0.66971800  |
| C | -4.84646000 | -2.70016300 | -5.50226300 |
| H | -5.65346300 | -2.67784300 | -6.22762400 |
| C | 5.93147200  | -3.96269700 | 1.92986700  |
| H | 6.60314800  | -3.24661500 | 2.41107900  |
| H | 5.87032800  | -4.85035800 | 2.56761100  |
| H | 6.37860100  | -4.26119600 | 0.97823700  |
| H | 2.12598700  | -2.66488200 | 4.20445900  |
| C | 1.65467800  | -4.05453500 | 2.64844100  |
| H | 2.09596000  | -4.94493600 | 3.10754100  |
| H | 0.59606100  | -4.02579600 | 2.91138600  |
| H | 1.71744300  | -4.16773600 | 1.56293200  |

S\*\*2 before annihilation      0.2320,      after      0.0041

S-TS4<sup>OSS</sup>

|   |             |             |             |
|---|-------------|-------------|-------------|
| C | 0.81114200  | -3.57112300 | 2.62926900  |
| C | 0.09727000  | -4.34407400 | 1.49553600  |
| C | 2.29870900  | -3.21611900 | 2.43295200  |
| H | -0.80695600 | -4.79359700 | 1.91957500  |
| H | 0.25855200  | -2.65847900 | 2.87855600  |
| H | 0.76291400  | -4.19771700 | 3.52858000  |
| H | 2.83928700  | -4.12890500 | 2.16101600  |
| P | 2.56830400  | -2.04835100 | 1.00111400  |
| P | -0.46852900 | -3.17297700 | 0.16029800  |
| C | 4.38079500  | -1.99202500 | 0.74683500  |
| C | 4.88850800  | -0.99392900 | -0.10230000 |
| C | 5.27865200  | -2.85192500 | 1.39187500  |
| C | 6.26156500  | -0.82641300 | -0.25733400 |
| H | 4.20189100  | -0.33084400 | -0.62019200 |
| C | 6.65615700  | -2.69102800 | 1.22524400  |
| H | 4.91990800  | -3.64282900 | 2.03973000  |
| C | 7.15071800  | -1.66947200 | 0.41562000  |
| H | 6.63895500  | -0.03751700 | -0.90035200 |

|    |             |             |             |
|----|-------------|-------------|-------------|
| H  | 7.34004000  | -3.35724800 | 1.74162300  |
| H  | 8.22170800  | -1.53387200 | 0.30306900  |
| C  | 2.16076300  | -0.39160900 | 1.68682000  |
| C  | 3.13586600  | 0.47403900  | 2.20482900  |
| C  | 0.81762000  | 0.02167900  | 1.68537000  |
| C  | 2.77173700  | 1.72480300  | 2.70241300  |
| H  | 4.17755800  | 0.17597400  | 2.21935100  |
| C  | 0.45780200  | 1.27350300  | 2.18365600  |
| H  | 0.04240300  | -0.62580800 | 1.29942200  |
| C  | 1.43502400  | 2.12998700  | 2.69058400  |
| H  | 3.53529500  | 2.38380100  | 3.10360300  |
| H  | -0.58741900 | 1.56749200  | 2.17530900  |
| H  | 1.15938300  | 3.10517000  | 3.07915100  |
| C  | -1.82469600 | -2.20432000 | 0.92426300  |
| C  | -2.25807200 | -1.06488300 | 0.22360000  |
| C  | -2.42005700 | -2.51209000 | 2.15520400  |
| C  | -3.25501400 | -0.24653200 | 0.74940100  |
| H  | -1.79782700 | -0.81935100 | -0.72562800 |
| C  | -3.41561700 | -1.68672600 | 2.68178300  |
| H  | -2.11821800 | -3.39033900 | 2.71440400  |
| C  | -3.83239900 | -0.55268000 | 1.98401900  |
| H  | -3.57309500 | 0.63078800  | 0.19445800  |
| H  | -3.86600900 | -1.93340000 | 3.63801800  |
| H  | -4.60555200 | 0.08618900  | 2.39898200  |
| C  | -1.32970700 | -4.21975900 | -1.07892300 |
| C  | -2.72676900 | -4.22507200 | -1.19658100 |
| C  | -3.34900400 | -4.99886100 | -2.17747500 |
| H  | -3.33024300 | -3.62365500 | -0.52684200 |
| C  | -1.19689100 | -5.78440900 | -2.93732200 |
| C  | -2.58881800 | -5.77787900 | -3.04960400 |
| H  | -4.43150800 | -4.99206600 | -2.25702700 |
| H  | -0.59737400 | -6.39066800 | -3.60948700 |
| H  | -3.07631000 | -6.37710000 | -3.81182700 |
| Co | 1.27539300  | -1.97008700 | -0.76978300 |
| C  | 1.32706900  | -0.27477000 | -3.87026800 |
| C  | 1.85462600  | 0.92400200  | -4.58755900 |
| C  | 1.71087200  | 1.07214200  | -5.97396000 |
| C  | 2.50805200  | 1.92715900  | -3.85996100 |
| C  | 2.21482900  | 2.19998700  | -6.61976200 |
| H  | 1.18588500  | 0.31023300  | -6.54310700 |
| C  | 3.01224000  | 3.05504400  | -4.50574000 |
| H  | 2.61126900  | 1.82464800  | -2.78310800 |
| C  | 2.86720800  | 3.19324700  | -5.88689800 |
| H  | 2.09427100  | 2.30500200  | -7.69320900 |

|   |             |             |             |
|---|-------------|-------------|-------------|
| H | 3.51594000  | 3.82605300  | -3.93124500 |
| H | 3.25809800  | 4.07167600  | -6.39012200 |
| C | 1.82250000  | -1.51451900 | -4.12069300 |
| C | 2.93066000  | -1.82360300 | -5.09919800 |
| H | 2.85336600  | -1.27409700 | -6.03674500 |
| H | 3.89743200  | -1.54413500 | -4.65212200 |
| N | 2.81797000  | -3.27139400 | -5.32107000 |
| C | 1.77569100  | -3.87706000 | -4.47957900 |
| H | 0.88981900  | -4.10828800 | -5.08022800 |
| H | 2.12126300  | -4.80736500 | -4.02460900 |
| S | 4.18137400  | -4.16525200 | -5.70158000 |
| O | 3.69976100  | -5.43737800 | -6.23287400 |
| O | 5.05082000  | -3.25284300 | -6.44241900 |
| C | 4.93206300  | -4.49897300 | -4.11375900 |
| C | 4.55244700  | -5.64228800 | -3.40553100 |
| C | 5.81101100  | -3.56109500 | -3.56719300 |
| C | 5.03717200  | -5.82843900 | -2.11092700 |
| H | 3.91567800  | -6.37908800 | -3.88182700 |
| C | 6.29422400  | -3.76355700 | -2.27579400 |
| H | 6.12732100  | -2.71153100 | -4.16197000 |
| C | 5.89752000  | -4.88547600 | -1.54434600 |
| H | 4.75955400  | -6.71843400 | -1.55468000 |
| H | 6.98217300  | -3.05076200 | -1.83973800 |
| C | -0.57274300 | -5.00753800 | -1.96375600 |
| H | 0.50813600  | -5.02053400 | -1.89353700 |
| C | 1.45405900  | -2.79836600 | -3.42987700 |
| C | 2.32530700  | -2.90202100 | -2.15935900 |
| C | 2.86655800  | -2.65936600 | 3.74834100  |
| H | 2.28550200  | -1.79624600 | 4.08270600  |
| H | 2.81408300  | -3.42623400 | 4.52757000  |
| H | 3.90686600  | -2.34210100 | 3.65573400  |
| C | 0.95122700  | -5.48691400 | 0.93250600  |
| H | 1.33980100  | -6.09942200 | 1.75281200  |
| H | 0.36387700  | -6.13557600 | 0.28126400  |
| H | 1.80639200  | -5.11588400 | 0.35827500  |
| H | 0.40153500  | -2.84173400 | -3.15607500 |
| H | 3.38669800  | -2.79281400 | -2.39409700 |
| H | 2.21903500  | -3.87153900 | -1.66127300 |
| H | 6.27844700  | -5.03132400 | -0.53951200 |
| C | -1.62662800 | 2.79058100  | -1.36227800 |
| C | -2.13412700 | 3.40943800  | -2.50809700 |
| C | -1.82390100 | 2.90448600  | -3.77332700 |
| C | -0.99824500 | 1.79143400  | -3.89995800 |
| C | -0.49693000 | 1.15612300  | -2.75263500 |

|   |             |             |             |
|---|-------------|-------------|-------------|
| C | -0.82288100 | 1.66215700  | -1.48159300 |
| H | -1.85432400 | 3.19070600  | -0.37924700 |
| H | -2.76598300 | 4.28723500  | -2.41624400 |
| H | -2.22232600 | 3.38226300  | -4.66216900 |
| H | -0.75553200 | 1.40860200  | -4.88314200 |
| H | -0.41930500 | 1.17761600  | -0.60093500 |
| C | 0.32309100  | -0.07207900 | -2.81732700 |
| O | 0.12591200  | -0.91131000 | -1.89556000 |
| H | 2.46145800  | -1.49590900 | -1.49787700 |

S\*\*2 before annihilation      0.2203,      after      0.0036

*R-TS4*<sup>OSS</sup>

|   |            |             |             |
|---|------------|-------------|-------------|
| C | 4.07780300 | -2.88701500 | 3.30672800  |
| C | 2.53399000 | -2.91038100 | 3.39082800  |
| C | 4.70776500 | -3.29307400 | 1.95991700  |
| H | 4.46692900 | -1.90921000 | 3.61015800  |
| H | 4.43543300 | -3.59743800 | 4.06236900  |
| H | 4.10436300 | -4.09885800 | 1.53092100  |
| P | 4.54033800 | -1.90002500 | 0.73900100  |
| P | 1.69812800 | -1.60178100 | 2.36567500  |
| C | 4.98272300 | -2.61587300 | -0.88373300 |
| C | 5.52339200 | -1.79191700 | -1.88456500 |
| C | 4.58231200 | -3.91778700 | -1.22431400 |
| C | 5.66309000 | -2.26175600 | -3.18903500 |
| H | 5.82597500 | -0.77981000 | -1.64204900 |
| C | 4.72122500 | -4.38497800 | -2.53181600 |
| H | 4.15489900 | -4.57741800 | -0.47656500 |
| C | 5.25852500 | -3.55774600 | -3.51887600 |
| H | 6.08905200 | -1.61467900 | -3.94964600 |
| H | 4.41292200 | -5.39688500 | -2.77563800 |
| H | 5.36880600 | -3.92209600 | -4.53525000 |
| C | 5.85474200 | -0.69464500 | 1.12767400  |
| C | 7.20989400 | -0.92531000 | 0.83705200  |
| C | 5.48092000 | 0.51139800  | 1.73801600  |
| C | 8.16959100 | 0.03113800  | 1.16226300  |
| H | 7.51047500 | -1.84317600 | 0.34353900  |
| C | 6.44534100 | 1.46378500  | 2.06861400  |
| H | 4.43777500 | 0.71336500  | 1.94025100  |
| C | 7.78932300 | 1.22522600  | 1.78193300  |
| H | 9.21411700 | -0.15342300 | 0.93178200  |
| H | 6.13769100 | 2.39062700  | 2.54216400  |
| H | 8.54078000 | 1.96694000  | 2.03439900  |
| C | 2.16613600 | 0.02297200  | 3.07006900  |
| C | 1.88863700 | 1.14796100  | 2.27069900  |



|    |             |             |             |
|----|-------------|-------------|-------------|
| C  | 2.86584200  | 0.19608500  | 4.27137600  |
| C  | 2.33669900  | 2.41301500  | 2.64597700  |
| H  | 1.33106900  | 1.02118700  | 1.34697900  |
| C  | 3.30350800  | 1.46567100  | 4.65094000  |
| H  | 3.07947200  | -0.65113000 | 4.91343700  |
| C  | 3.05093600  | 2.57105200  | 3.83573800  |
| H  | 2.13595900  | 3.26553800  | 2.00661500  |
| H  | 3.84661500  | 1.59008400  | 5.58244800  |
| H  | 3.40298200  | 3.55432600  | 4.13166500  |
| C  | -0.08368900 | -1.79329400 | 2.73340400  |
| C  | -0.51659500 | -1.97425700 | 4.05800800  |
| C  | -1.87366300 | -2.10159600 | 4.34257000  |
| H  | 0.20082200  | -2.00816500 | 4.87231400  |
| C  | -2.39336000 | -1.85501500 | 1.99574600  |
| C  | -2.81472400 | -2.04768500 | 3.31023500  |
| H  | -2.19796900 | -2.24101300 | 5.36901000  |
| H  | -3.11011000 | -1.81196000 | 1.18224800  |
| H  | -3.87143600 | -2.15314600 | 3.53487900  |
| Co | 2.42321100  | -1.18358500 | 0.36059600  |
| C  | 1.27976300  | 0.57130900  | -2.43131300 |
| C  | 0.44731100  | 1.64234900  | -3.05942800 |
| C  | 0.98022000  | 2.50373200  | -4.02450700 |
| C  | -0.89674600 | 1.78087600  | -2.68002100 |
| C  | 0.18719400  | 3.50156100  | -4.59185900 |
| H  | 2.02035600  | 2.40041600  | -4.31884200 |
| C  | -1.68749700 | 2.77905600  | -3.24782100 |
| H  | -1.30958000 | 1.09942500  | -1.94094900 |
| C  | -1.14529600 | 3.64379100  | -4.20196800 |
| H  | 0.61012900  | 4.16763900  | -5.33722300 |
| H  | -2.72447700 | 2.88492000  | -2.94420900 |
| H  | -1.75995500 | 4.42276000  | -4.64167200 |
| C  | 1.03389700  | -0.72169400 | -2.78670900 |
| C  | 0.02374600  | -1.08674400 | -3.85975200 |
| H  | -0.88661700 | -0.49248600 | -3.84810600 |
| H  | 0.48718100  | -0.94667400 | -4.84650500 |
| N  | -0.24820600 | -2.52062600 | -3.68128600 |
| C  | 1.03697300  | -3.08491200 | -3.21531900 |
| H  | 0.87694500  | -4.04200400 | -2.72050100 |
| H  | 1.65558700  | -3.25009900 | -4.10305200 |
| S  | -1.58442300 | -2.79596500 | -2.63955700 |
| O  | -1.46405500 | -4.18348500 | -2.18581000 |
| O  | -1.70679800 | -1.70784300 | -1.64459600 |
| C  | -2.93259900 | -2.62501200 | -3.78856400 |
| C  | -3.15073800 | -3.64172700 | -4.72044200 |

|   |             |             |             |
|---|-------------|-------------|-------------|
| C | -3.73607800 | -1.48686900 | -3.72986700 |
| C | -4.20312000 | -3.50419500 | -5.62122400 |
| H | -2.51263100 | -4.51802700 | -4.72903400 |
| C | -4.78479000 | -1.36237400 | -4.64169800 |
| H | -3.54188000 | -0.72960000 | -2.97948700 |
| H | -4.39267200 | -4.28413200 | -6.35120500 |
| H | -5.42262200 | -0.48509000 | -4.61266800 |
| C | -1.03441500 | -1.72328300 | 1.70752800  |
| H | -0.73711500 | -1.56163500 | 0.68108100  |
| C | 1.66866500  | -2.00327600 | -2.29632700 |
| H | 2.75265400  | -1.95660900 | -2.42042800 |
| C | 1.36823600  | -2.33733500 | -0.81861500 |
| H | 0.32530000  | -2.61542100 | -0.68681900 |
| H | 1.97127600  | -3.20802500 | -0.52957700 |
| O | 3.09866000  | 0.02323700  | -1.00465200 |
| H | 1.03833600  | -1.03542000 | -0.11613300 |
| C | 2.36603900  | 0.91921500  | -1.51101200 |
| C | 2.71801000  | 2.30886400  | -1.12012000 |
| C | 1.78793500  | 3.35797400  | -1.00497100 |
| C | 4.04782600  | 2.53069000  | -0.71178900 |
| C | 2.19029200  | 4.59637300  | -0.50683500 |
| H | 0.75214700  | 3.20977500  | -1.27366900 |
| C | 4.44760000  | 3.77295700  | -0.23745100 |
| H | 4.75279100  | 1.71082700  | -0.76236400 |
| C | 3.51863100  | 4.81265000  | -0.13562000 |
| H | 1.46133600  | 5.39475400  | -0.41295600 |
| H | 5.47931200  | 3.92652200  | 0.06160300  |
| H | 3.82693800  | 5.78448500  | 0.23729600  |
| C | -5.01535900 | -2.36646100 | -5.58302600 |
| H | -5.83385900 | -2.26608500 | -6.28864300 |
| C | 6.14124000  | -3.80104900 | 2.13515500  |
| H | 6.77685100  | -3.04088400 | 2.59704100  |
| H | 6.14948300  | -4.68573000 | 2.78011000  |
| H | 6.58491900  | -4.07960400 | 1.17550400  |
| H | 2.27339300  | -2.70704100 | 4.43626100  |
| C | 1.94399400  | -4.28037600 | 3.01640900  |
| H | 2.48772000  | -5.07737500 | 3.53324900  |
| H | 0.89162500  | -4.34776800 | 3.29731300  |
| H | 2.00636600  | -4.47192900 | 1.94056200  |

S\*\*2 before annihilation      2.0783,      after      2.0013

S-TS5<sup>triplet</sup>

|   |             |             |            |
|---|-------------|-------------|------------|
| C | 0.37452300  | -2.25062800 | 2.86534800 |
| C | -0.31401400 | -3.33805600 | 2.00016700 |

|   |             |             |             |
|---|-------------|-------------|-------------|
| C | 1.91090800  | -2.09620500 | 2.77588400  |
| H | -1.32367600 | -3.46320500 | 2.40962300  |
| H | -0.09845200 | -1.27591100 | 2.70361200  |
| H | 0.15373100  | -2.51392100 | 3.90674500  |
| H | 2.35686100  | -3.08918900 | 2.66227800  |
| P | 2.39993500  | -1.17683700 | 1.22941000  |
| P | -0.55513000 | -2.83475400 | 0.22093500  |
| C | 4.21180500  | -1.24145900 | 1.09517300  |
| C | 4.84168000  | -0.34206000 | 0.21670700  |
| C | 4.96945800  | -2.25770700 | 1.69417100  |
| C | 6.20458000  | -0.45363700 | -0.04685900 |
| H | 4.26050900  | 0.44281300  | -0.25723100 |
| C | 6.33613100  | -2.36408900 | 1.42923800  |
| H | 4.50687100  | -2.96557700 | 2.37358300  |
| C | 6.95356400  | -1.46505100 | 0.56097000  |
| H | 6.68495400  | 0.23698900  | -0.73134800 |
| H | 6.91549100  | -3.14880500 | 1.90516800  |
| H | 8.01284400  | -1.54985600 | 0.34941800  |
| C | 1.96288700  | 0.56583100  | 1.52542900  |
| C | 2.78879800  | 1.42950900  | 2.26228200  |
| C | 0.73635100  | 1.03640500  | 1.03263900  |
| C | 2.38361600  | 2.74021300  | 2.50744300  |
| H | 3.74654000  | 1.08014100  | 2.63304900  |
| C | 0.33053200  | 2.34539700  | 1.28978400  |
| H | 0.10025000  | 0.38529000  | 0.44529500  |
| C | 1.15350700  | 3.19767900  | 2.02703600  |
| H | 3.02693200  | 3.40522800  | 3.07477400  |
| H | -0.62388700 | 2.69393200  | 0.90844400  |
| H | 0.84223100  | 4.21883900  | 2.22296200  |
| C | -1.74763000 | -1.45019400 | 0.23957300  |
| C | -1.85883800 | -0.68894000 | -0.93618100 |
| C | -2.51528000 | -1.09879500 | 1.35851700  |
| C | -2.71866000 | 0.40576900  | -0.98850000 |
| H | -1.25672200 | -0.95000900 | -1.80104600 |
| C | -3.36773200 | 0.00452100  | 1.30551300  |
| H | -2.45613600 | -1.67278500 | 2.27617800  |
| C | -3.46849800 | 0.75924400  | 0.13614800  |
| H | -2.79954600 | 0.98516600  | -1.90266500 |
| H | -3.95428500 | 0.27212100  | 2.17852300  |
| H | -4.13237700 | 1.61699400  | 0.09928700  |
| C | -1.39973400 | -4.22481200 | -0.59335900 |
| C | -0.88618400 | -4.70495500 | -1.80508700 |
| C | -1.50978100 | -5.76741800 | -2.45974700 |
| H | -0.00636900 | -4.23698400 | -2.23663200 |

|    |             |             |             |
|----|-------------|-------------|-------------|
| C  | -3.16919100 | -5.87235100 | -0.69939800 |
| C  | -2.64697900 | -6.35363600 | -1.90375100 |
| H  | -1.10939000 | -6.13485100 | -3.39906700 |
| H  | -4.05962500 | -6.32403000 | -0.27415300 |
| H  | -3.13178100 | -7.18213600 | -2.40991200 |
| Co | 1.41906300  | -2.06148700 | -0.65569400 |
| C  | 1.58546200  | -0.74408300 | -2.01499500 |
| C  | 2.58456000  | -1.44892900 | -2.46772900 |
| C  | 3.75607500  | -1.14310100 | -3.37416300 |
| H  | 3.42567200  | -0.82774800 | -4.36611200 |
| H  | 4.32250500  | -0.31862800 | -2.91213300 |
| N  | 4.53901500  | -2.36213200 | -3.46770500 |
| C  | 4.42567700  | -3.14827900 | -2.25065200 |
| H  | 4.81481900  | -4.15071000 | -2.43071200 |
| H  | 4.94586200  | -2.69984900 | -1.39314000 |
| S  | 5.90000600  | -2.41685900 | -4.44085500 |
| O  | 6.34345700  | -3.80866000 | -4.41293600 |
| O  | 5.52013200  | -1.71444100 | -5.66418300 |
| C  | 7.14070100  | -1.42760200 | -3.61494900 |
| C  | 8.10224100  | -2.05879800 | -2.82514600 |
| C  | 7.13122300  | -0.04093700 | -3.79035500 |
| C  | 9.07453700  | -1.28003400 | -2.19749300 |
| H  | 8.10035600  | -3.13930200 | -2.73922900 |
| C  | 8.09850600  | 0.72743200  | -3.14328600 |
| H  | 6.40659900  | 0.41465300  | -4.45575900 |
| H  | 9.84673300  | -1.75903900 | -1.60367400 |
| H  | 8.11167200  | 1.80401200  | -3.27930500 |
| C  | -2.55227200 | -4.80837700 | -0.04609800 |
| H  | -2.97254700 | -4.42841300 | 0.88047600  |
| C  | 2.92011700  | -3.19341200 | -1.99635700 |
| C  | 2.49551300  | -3.73690700 | -0.69561900 |
| H  | 1.83403400  | -4.59674400 | -0.72794800 |
| H  | 3.27050000  | -3.79065000 | 0.06497000  |
| C  | 9.06815600  | 0.10871700  | -2.34854500 |
| H  | 9.83111400  | 0.70879000  | -1.86284900 |
| C  | 2.46269800  | -1.44247200 | 4.04967700  |
| H  | 1.99113800  | -0.47235000 | 4.22722500  |
| H  | 2.26088500  | -2.08123500 | 4.91530000  |
| H  | 3.54258000  | -1.28638500 | 3.99049500  |
| C  | 0.38143100  | -4.70283100 | 2.08560600  |
| H  | 1.35682600  | -4.69496600 | 1.59513300  |
| H  | 0.53236800  | -4.97609200 | 3.13477400  |
| H  | -0.22108500 | -5.48351800 | 1.61730600  |
| H  | 2.40383800  | -3.66611600 | -2.83348500 |

|                                 |             |             |             |
|---------------------------------|-------------|-------------|-------------|
| H                               | 1.25309200  | 0.26457300  | -2.21904300 |
| S**2 before annihilation        | 2.0678,     | after       | 2.0011      |
| <i>R-TS5</i> <sup>triplet</sup> |             |             |             |
| C                               | 0.40288000  | -1.92686700 | 2.98983400  |
| C                               | -0.45361500 | -2.95501300 | 2.20341900  |
| C                               | 1.94424100  | -1.98102500 | 2.86194700  |
| H                               | -1.46318300 | -2.90275400 | 2.62857500  |
| H                               | 0.06162900  | -0.90620500 | 2.78538200  |
| H                               | 0.17970900  | -2.10219900 | 4.04912800  |
| H                               | 2.25982500  | -3.02721400 | 2.79669100  |
| P                               | 2.52982400  | -1.20419600 | 1.26956800  |
| P                               | -0.62819000 | -2.51121100 | 0.40434500  |
| C                               | 4.31705200  | -1.49861200 | 1.12065200  |
| C                               | 5.01336100  | -0.77018400 | 0.14014000  |
| C                               | 4.97960500  | -2.51848900 | 1.81828200  |
| C                               | 6.35184300  | -1.04996100 | -0.12291700 |
| H                               | 4.50519300  | 0.01400200  | -0.41315400 |
| C                               | 6.32103400  | -2.79591400 | 1.54818700  |
| H                               | 4.46331500  | -3.09783600 | 2.57609400  |
| C                               | 7.00801500  | -2.06470000 | 0.57958300  |
| H                               | 6.88286400  | -0.47846900 | -0.87736800 |
| H                               | 6.82716300  | -3.58287800 | 2.09797000  |
| H                               | 8.05010500  | -2.28341700 | 0.37098600  |
| C                               | 2.29327900  | 0.58782200  | 1.47535800  |
| C                               | 3.22750600  | 1.39077300  | 2.14787300  |
| C                               | 1.11276500  | 1.16243100  | 0.98092800  |
| C                               | 2.97162800  | 2.74854200  | 2.33106900  |
| H                               | 4.15239000  | 0.95852000  | 2.51501200  |
| C                               | 0.85621900  | 2.51846300  | 1.17810600  |
| H                               | 0.39939200  | 0.55479100  | 0.43686300  |
| C                               | 1.78510500  | 3.31151300  | 1.85333400  |
| H                               | 3.69804900  | 3.36803300  | 2.84720600  |
| H                               | -0.06411200 | 2.94987400  | 0.79777400  |
| H                               | 1.59079300  | 4.36901400  | 2.00145000  |
| C                               | -1.67969000 | -1.01544500 | 0.34845200  |
| C                               | -1.78411900 | -0.36512800 | -0.89303000 |
| C                               | -2.32207700 | -0.46395100 | 1.46490700  |
| C                               | -2.51317700 | 0.81519400  | -1.01266100 |
| H                               | -1.28582700 | -0.78622800 | -1.76082900 |
| C                               | -3.04405400 | 0.72423500  | 1.34357300  |
| H                               | -2.26614700 | -0.94619400 | 2.43396800  |
| C                               | -3.13804800 | 1.36702900  | 0.10898100  |
| H                               | -2.59097400 | 1.30698600  | -1.97711000 |

|    |             |             |             |
|----|-------------|-------------|-------------|
| H  | -3.53436500 | 1.14529600  | 2.21544900  |
| H  | -3.69991700 | 2.29110700  | 0.01888800  |
| C  | -1.59145800 | -3.82684400 | -0.40548300 |
| C  | -2.73080300 | -4.40179200 | 0.17570300  |
| C  | -3.43490700 | -5.39116600 | -0.50777400 |
| H  | -3.07102700 | -4.07667700 | 1.15443100  |
| C  | -1.89175400 | -5.22296700 | -2.36739700 |
| C  | -3.01546100 | -5.80196700 | -1.77659000 |
| H  | -4.31378900 | -5.83853500 | -0.05470300 |
| H  | -1.56721500 | -5.53333900 | -3.35487400 |
| H  | -3.56981600 | -6.57154000 | -2.30443300 |
| Co | 1.42327100  | -2.03210600 | -0.53270900 |
| C  | 1.52028800  | -0.97811500 | -2.09894100 |
| C  | 2.06317800  | -2.02243100 | -2.66214200 |
| C  | 2.26485500  | -2.46410400 | -4.09019400 |
| H  | 1.26712200  | -2.55600100 | -4.54972300 |
| H  | 2.83657700  | -1.72838400 | -4.65943400 |
| N  | 2.97647300  | -3.73772200 | -4.05508500 |
| C  | 2.65524200  | -4.46273300 | -2.83291400 |
| H  | 1.63401000  | -4.87725000 | -2.83252600 |
| H  | 3.36605300  | -5.27929400 | -2.70128900 |
| S  | 3.07429600  | -4.61448500 | -5.49585500 |
| O  | 3.41606200  | -3.63244100 | -6.52116100 |
| O  | 3.89607600  | -5.78101100 | -5.18687400 |
| C  | 1.40136800  | -5.17414500 | -5.78962700 |
| C  | 0.52914500  | -4.36616600 | -6.52416600 |
| C  | 0.98613000  | -6.38997100 | -5.24065300 |
| C  | -0.79032600 | -4.78346900 | -6.69906800 |
| H  | 0.89607600  | -3.45185200 | -6.97674500 |
| C  | -0.33395600 | -6.79893000 | -5.43004300 |
| H  | 1.69835500  | -7.01233900 | -4.71091900 |
| C  | -1.22055400 | -5.99486100 | -6.15226000 |
| H  | -1.47616000 | -4.17317600 | -7.27752400 |
| H  | -0.66510700 | -7.75102500 | -5.02777000 |
| C  | -1.17984600 | -4.24011300 | -1.68014300 |
| H  | -0.30664000 | -3.78041900 | -2.13255900 |
| C  | 2.80465600  | -3.43999000 | -1.71689900 |
| H  | 3.82417300  | -3.05956200 | -1.64894600 |
| C  | 2.26152300  | -3.83776700 | -0.41013200 |
| H  | 1.51968700  | -4.63296500 | -0.42941700 |
| H  | 2.98226500  | -3.90933900 | 0.39781500  |
| C  | 2.59738200  | -1.33267000 | 4.09160500  |
| H  | 2.24403300  | -0.30666800 | 4.22327400  |
| H  | 2.33985100  | -1.89879900 | 4.99215100  |

|   |             |             |             |
|---|-------------|-------------|-------------|
| H | 3.68639500  | -1.30479200 | 4.01084400  |
| C | 0.04283000  | -4.39702100 | 2.37390300  |
| H | 0.15868700  | -4.62340900 | 3.43864100  |
| H | -0.66449200 | -5.11336400 | 1.95204700  |
| H | 1.00756100  | -4.55957200 | 1.88910600  |
| H | -2.24454600 | -6.32141500 | -6.30415800 |
| H | 1.14739200  | -0.03970400 | -2.48545300 |

S\*\*2 before annihilation    -0.0000,    after    -0.0000

*S-TS6*<sup>CSS</sup>

|   |             |             |             |
|---|-------------|-------------|-------------|
| C | 0.93844200  | -2.95435300 | 2.60078600  |
| C | -0.05542800 | -3.92419700 | 1.92966000  |
| C | 2.22382100  | -2.60601200 | 1.82612600  |
| H | -0.82464500 | -4.15631900 | 2.67557200  |
| H | 0.43779900  | -2.02506400 | 2.89142300  |
| H | 1.25101400  | -3.43066900 | 3.53786600  |
| H | 2.57525900  | -3.50030900 | 1.30098300  |
| P | 1.87879300  | -1.38083300 | 0.46345700  |
| P | -0.95381400 | -3.15188400 | 0.49775400  |
| C | 3.51448700  | -1.02749700 | -0.26565400 |
| C | 3.82592700  | 0.27117100  | -0.69503400 |
| C | 4.43908900  | -2.05918900 | -0.49310500 |
| C | 5.04690800  | 0.53502000  | -1.31493400 |
| H | 3.12170300  | 1.07920800  | -0.53306600 |
| C | 5.65655700  | -1.79405100 | -1.12007100 |
| H | 4.22406300  | -3.07256600 | -0.17098600 |
| C | 5.96579700  | -0.49441900 | -1.52330400 |
| H | 5.28055800  | 1.54694000  | -1.63061900 |
| H | 6.36309500  | -2.59707900 | -1.29754600 |
| H | 6.91440200  | -0.29349100 | -2.00595500 |
| C | 1.35531500  | 0.17020500  | 1.26577700  |
| C | 2.20985000  | 0.93588500  | 2.07773500  |
| C | 0.03655600  | 0.60241500  | 1.06551000  |
| C | 1.73704700  | 2.09202300  | 2.69443900  |
| H | 3.24454700  | 0.64192200  | 2.20971300  |
| C | -0.43609900 | 1.75835600  | 1.68595300  |
| H | -0.63607400 | 0.03349900  | 0.43430900  |
| C | 0.41338000  | 2.50045900  | 2.50599300  |
| H | 2.40262500  | 2.67783500  | 3.32031000  |
| H | -1.46393100 | 2.06749100  | 1.52930800  |
| H | 0.05077800  | 3.40071500  | 2.99184400  |
| C | -2.14500200 | -1.96423500 | 1.22345200  |
| C | -2.92781100 | -1.22430200 | 0.31847700  |
| C | -2.28017800 | -1.72841100 | 2.59743400  |

|    |             |             |             |
|----|-------------|-------------|-------------|
| C  | -3.81638000 | -0.25876700 | 0.78663500  |
| H  | -2.82402600 | -1.40426700 | -0.74655500 |
| C  | -3.17086400 | -0.75848700 | 3.06018900  |
| H  | -1.70197000 | -2.29234200 | 3.31952900  |
| C  | -3.93489200 | -0.01848800 | 2.15817300  |
| H  | -4.41908400 | 0.30432200  | 0.08079100  |
| H  | -3.26702500 | -0.58447100 | 4.12718300  |
| H  | -4.62605000 | 0.73532000  | 2.52162900  |
| C  | -2.02149100 | -4.48750100 | -0.14405700 |
| C  | -2.88150500 | -5.16400400 | 0.73600300  |
| C  | -3.68805500 | -6.19842400 | 0.26911100  |
| H  | -2.93139000 | -4.87555200 | 1.78194700  |
| C  | -2.81157700 | -5.87829700 | -1.96164700 |
| C  | -3.64974400 | -6.56024400 | -1.08049000 |
| H  | -4.34981300 | -6.71860900 | 0.95420900  |
| H  | -2.79242200 | -6.14810800 | -3.01298600 |
| H  | -4.27996300 | -7.36601600 | -1.44305700 |
| Co | 0.29120900  | -1.96776900 | -1.00014700 |
| C  | 1.19147200  | -0.80252200 | -2.43141400 |
| C  | 1.99134200  | -1.63538400 | -3.13485100 |
| C  | 3.15866500  | -1.35681400 | -4.03816600 |
| H  | 2.90256100  | -0.65915800 | -4.84061400 |
| H  | 4.00014500  | -0.93666800 | -3.46564600 |
| N  | 3.43746600  | -2.69043500 | -4.58681800 |
| C  | 3.05014300  | -3.72617100 | -3.62555000 |
| H  | 2.90962600  | -4.67733500 | -4.13747700 |
| H  | 3.79755200  | -3.84655700 | -2.82595100 |
| S  | 4.67496300  | -2.93616400 | -5.67675900 |
| O  | 4.48785500  | -4.29406000 | -6.18349600 |
| O  | 4.68090300  | -1.75141900 | -6.53443800 |
| C  | 6.19014700  | -2.92503600 | -4.72309900 |
| C  | 6.56786000  | -4.08016300 | -4.03275400 |
| C  | 6.96921800  | -1.76845900 | -4.69261900 |
| C  | 7.74378300  | -4.06536300 | -3.28381900 |
| H  | 5.96886600  | -4.97992400 | -4.11707200 |
| C  | 8.15105300  | -1.77055200 | -3.95065600 |
| H  | 6.66167400  | -0.90315600 | -5.26844700 |
| C  | 8.53320600  | -2.91185700 | -3.24188000 |
| H  | 8.05696400  | -4.95892500 | -2.75329000 |
| H  | 8.78125700  | -0.88664600 | -3.93858500 |
| C  | -1.99905800 | -4.84237500 | -1.49809400 |
| H  | -1.37544700 | -4.28520100 | -2.18358700 |
| C  | 1.74606500  | -3.12258600 | -3.06227700 |
| C  | 1.32785000  | -3.51127400 | -1.65727200 |



|   |             |             |             |
|---|-------------|-------------|-------------|
| C | 3.31729200  | -2.15043200 | 2.80258200  |
| H | 2.96183800  | -1.32859300 | 3.42937100  |
| H | 3.58208100  | -2.98094800 | 3.46442400  |
| H | 4.22490800  | -1.82635500 | 2.28930200  |
| C | 0.59696800  | -5.25332600 | 1.51834400  |
| H | 1.16709000  | -5.65899300 | 2.36036200  |
| H | -0.15699800 | -5.98919700 | 1.23421100  |
| H | 1.28072100  | -5.14118600 | 0.67366000  |
| H | 0.94358800  | -3.34864900 | -3.78006500 |
| H | 2.19370700  | -3.68142600 | -1.01535600 |
| H | 0.68037400  | -4.38695200 | -1.62772300 |
| H | 9.45712500  | -2.91019600 | -2.67214100 |
| C | -0.96425300 | -2.98495400 | -6.34491800 |
| C | -0.47500200 | -2.04487700 | -7.25140700 |
| C | -0.09048000 | -0.77380300 | -6.80765900 |
| C | -0.18426400 | -0.45208000 | -5.45932800 |
| C | -0.64688000 | -1.40501300 | -4.53801900 |
| C | -1.04796100 | -2.66981100 | -4.98854100 |
| H | -1.27908100 | -3.96317400 | -6.69371100 |
| H | -0.39807700 | -2.29503500 | -8.30441500 |
| H | 0.27991800  | -0.04085800 | -7.51673400 |
| H | 0.11831200  | 0.53142000  | -5.10890300 |
| H | -1.44527700 | -3.37980600 | -4.27226000 |
| C | -0.69671400 | -1.07538600 | -3.09763000 |
| O | -1.15563300 | -1.95943700 | -2.24718100 |
| H | -0.89900400 | -0.01690100 | -2.88731600 |
| H | 1.37013500  | 0.27157200  | -2.41982000 |

S\*\*2 before annihilation -0.0000, after -0.0000

*R-TS6*<sup>CSS</sup>

|   |             |             |            |
|---|-------------|-------------|------------|
| C | -0.23276700 | -2.49114800 | 2.85898900 |
| C | -0.29615400 | -3.33861900 | 1.56974400 |
| C | 1.15767400  | -2.00126700 | 3.31456400 |
| H | -1.32644900 | -3.69887400 | 1.46910300 |
| H | -0.91264200 | -1.63489200 | 2.79239200 |
| H | -0.63058700 | -3.12355600 | 3.66180300 |
| H | 1.89928300  | -2.77452600 | 3.08842300 |
| P | 1.68670800  | -0.52684300 | 2.30917400 |
| P | -0.00269800 | -2.31781400 | 0.03490900 |
| C | 3.37759500  | -0.11305500 | 2.84964800 |
| C | 3.85992300  | 1.18316100  | 2.60245400 |
| C | 4.24414800  | -1.07458000 | 3.39035100 |
| C | 5.18232500  | 1.50709200  | 2.89991200 |
| H | 3.20444600  | 1.92894600  | 2.16933200 |

|    |             |             |             |
|----|-------------|-------------|-------------|
| C  | 5.56716800  | -0.74419500 | 3.68682200  |
| H  | 3.89789700  | -2.08390800 | 3.58583400  |
| C  | 6.03861200  | 0.54543900  | 3.44116200  |
| H  | 5.54356500  | 2.51250000  | 2.70816100  |
| H  | 6.22579900  | -1.49466700 | 4.11205700  |
| H  | 7.06734700  | 0.80141000  | 3.67351600  |
| C  | 0.65855700  | 0.86367600  | 2.88776200  |
| C  | 0.92881400  | 1.51808000  | 4.10124800  |
| C  | -0.44124000 | 1.26818800  | 2.12043100  |
| C  | 0.09783800  | 2.54613200  | 4.54075200  |
| H  | 1.79278300  | 1.23382000  | 4.69126300  |
| C  | -1.27290700 | 2.29532600  | 2.56533400  |
| H  | -0.64378800 | 0.79079900  | 1.17242400  |
| C  | -1.00622200 | 2.93323600  | 3.77642600  |
| H  | 0.31368600  | 3.04811200  | 5.47848400  |
| H  | -2.12100400 | 2.59654700  | 1.95909800  |
| H  | -1.64961800 | 3.73598200  | 4.12246400  |
| C  | -1.47995600 | -1.24047100 | -0.09762800 |
| C  | -1.41821100 | -0.15655600 | -0.99293300 |
| C  | -2.62924800 | -1.39601600 | 0.69073300  |
| C  | -2.46977900 | 0.75342600  | -1.08500400 |
| H  | -0.54174500 | -0.02181600 | -1.61420900 |
| C  | -3.67800900 | -0.48086400 | 0.60153700  |
| H  | -2.72111900 | -2.22412800 | 1.38250100  |
| C  | -3.59988800 | 0.59770300  | -0.28060700 |
| H  | -2.40346700 | 1.58442200  | -1.77983200 |
| H  | -4.55779700 | -0.61303000 | 1.22294600  |
| H  | -4.41767500 | 1.30811900  | -0.34542700 |
| C  | -0.12986900 | -3.48011000 | -1.36607300 |
| C  | -1.24016200 | -3.48183600 | -2.22035700 |
| C  | -1.28726500 | -4.35919600 | -3.30577900 |
| H  | -2.06468700 | -2.80093900 | -2.04309100 |
| C  | 0.87453700  | -5.24922600 | -2.69311400 |
| C  | -0.23435100 | -5.24239100 | -3.54250600 |
| H  | -2.15118300 | -4.35174600 | -3.96283700 |
| H  | 1.69388200  | -5.93481700 | -2.87097300 |
| H  | -0.26927600 | -5.92420400 | -4.38541900 |
| Co | 1.63522300  | -0.80404800 | 0.04653000  |
| C  | 1.82463800  | -0.83052200 | -2.02998700 |
| C  | 2.81929400  | -1.69688200 | -2.31210000 |
| C  | 3.14866900  | -2.42648700 | -3.58561200 |
| H  | 2.34064900  | -3.12172600 | -3.86160800 |
| H  | 3.31809900  | -1.74172600 | -4.42183400 |
| N  | 4.39784800  | -3.11060400 | -3.22657300 |

|   |            |             |             |
|---|------------|-------------|-------------|
| C | 4.47404400 | -3.34432300 | -1.78130700 |
| H | 3.90741100 | -4.23636800 | -1.47173700 |
| H | 5.51321600 | -3.46598400 | -1.47892500 |
| S | 5.16568900 | -4.10385900 | -4.32258400 |
| O | 5.09157800 | -3.40537100 | -5.60502200 |
| O | 6.42421000 | -4.49138800 | -3.68827900 |
| C | 4.14670300 | -5.57007100 | -4.45407300 |
| C | 3.17779500 | -5.63997200 | -5.45672700 |
| C | 4.33647300 | -6.61553600 | -3.54633100 |
| C | 2.38241200 | -6.78254700 | -5.54888600 |
| H | 3.08277800 | -4.82612300 | -6.16617400 |
| C | 3.53058000 | -7.74969100 | -3.64514900 |
| H | 5.12665400 | -6.54919500 | -2.80690700 |
| H | 1.64038900 | -6.85947600 | -6.33730000 |
| H | 3.67493700 | -8.57566700 | -2.95621600 |
| C | 0.92906600 | -4.36658100 | -1.61844500 |
| H | 1.80059900 | -4.36788400 | -0.97658200 |
| C | 3.81874900 | -2.05121800 | -1.24652800 |
| H | 4.59368200 | -1.27128400 | -1.26932100 |
| C | 3.15129900 | -2.07995200 | 0.12000600  |
| H | 2.78679200 | -3.07383100 | 0.38005200  |
| H | 3.81427300 | -1.72116400 | 0.90620300  |
| C | 4.14141700 | 1.27049000  | -3.30570500 |
| C | 5.43378300 | 1.37731400  | -3.80516800 |
| C | 6.52677200 | 1.32859100  | -2.93121800 |
| C | 6.32204100 | 1.17978300  | -1.55932500 |
| C | 5.02713800 | 1.05779600  | -1.05473200 |
| C | 3.93199000 | 1.09832100  | -1.92922100 |
| H | 3.28932000 | 1.30442100  | -3.97984500 |
| H | 5.59630500 | 1.49942400  | -4.87090200 |
| H | 7.53496800 | 1.41159800  | -3.32402400 |
| H | 7.16989000 | 1.15358900  | -0.88219500 |
| H | 4.84577200 | 0.94331400  | 0.00802700  |
| O | 2.38560200 | 0.91034200  | -0.10019700 |
| C | 2.56117100 | 0.95447800  | -1.39684500 |
| H | 1.78594600 | 1.45809400  | -1.98869200 |
| C | 2.55545000 | -7.83253600 | -4.64396900 |
| H | 1.94011100 | -8.72300900 | -4.72457700 |
| C | 1.16165900 | -1.73350100 | 4.82533200  |
| H | 0.38465300 | -1.01344100 | 5.09447800  |
| H | 0.96223200 | -2.66443400 | 5.36542100  |
| H | 2.12089300 | -1.34161200 | 5.16997000  |
| C | 0.59422100 | -4.58725200 | 1.64755900  |
| H | 0.38708200 | -5.11747500 | 2.58261500  |

|   |            |             |             |
|---|------------|-------------|-------------|
| H | 0.39108100 | -5.27226900 | 0.82358100  |
| H | 1.66117000 | -4.35156300 | 1.63383800  |
| H | 1.07860100 | -0.60005600 | -2.79010900 |
